# Supplementary material for: Which Species Are We Researching and Why? A Case Study of the Ecology of British Breeding Birds
Source: PLoS One. 2015 Jul 8;10(7):e0131004. doi: 10.1371/journal.pone.0131004 (PMC4496060; doi:10.1371/journal.pone.0131004)
Supplement: S1 Database — (XLSX) [file pone.0131004.s001.xlsx]

## Sheet: Sheet1
Paper no.	Species	Times Cited	Author	BA	CA	GP	RI	OI	BE	Z2	Title	X1	Y1	Z1	FT	PN	AE	Z3	SE	BS	Abstract	Vol	Issue	Start Page	End Page	Publication Year	Source
1	Accipiter gentilis	27	Petty, SJ; Anderson, DIK; Davison, M; Little, B; Sherratt, TN; Thomas, CJ; Lambin, X				Lambin, Xavier/E-8284-2011	Lambin, Xavier/0000-0003-4643-2653			The decline of Common Kestrels Falco tinnunculus in a forested area of northern England: the role of predation by Northern Goshawks Accipiter gentilis										We have previously documented the decline of the Common Kestrel Falco tinnunculus over a 23-year period in a large coniferous forest in northern England. Kestrels fed predominantly on Field Voles Microtus agrestis, which were most abundant in young plantations (1-11 years old). Over the 23 years, voles remained abundant in the study area, but their numbers fluctuated cyclically. Here we consider …	145	3	472	483	2003	IBIS
2	Accipiter gentilis	22	Robertson, PA; Aebischer, NJ; Kenward, RE; Hanski, IK; Williams, NP				Robertson, Peter/H-1614-2013	Robertson, Peter/0000-0003-1567-8677			Simulation and jack-knifing assessment of home-range indices based on underlying trajectories										1. Home-range indices. describing, the area over which an animal moves or within which it concentrates its activity, are widely used in the analysis of animal movement, habitat selection, interaction and survival. the basic topics of applied animal ecology. However, the wide range of available indices and a poor understanding of their statistical properties limits their applicability, their inter…	35	6	928	940	1998	JOURNAL OF APPLIED ECOLOGY
3	Accipiter gentilis	18	Kenward, Robert E.						Bird, David M.; Varland, Daniel E.; Negro, Juan Jose		Goshawk adaptation to deforestation: does Europe differ from North America?													233	243	1996	Raptors in human landscapes: adaptations to built and cultivated environments.
4	Accipiter gentilis	15	Rutz, Christian; Bijlsma, Rob G.; Marquiss, Mick; Kenward, Robert E.								Population limitation in the Northern Goshawk in Europe: A review with case studies.										This paper investigates factors limiting breeding densities in populations of Northern Goshawk (Accipiter gentilis gentilis) in western, central, and southern Europe. We review the current status of the species and describe major population trends during the last century. Large-scale trends in numbers coincided with marked changes in the external environment (early 20th century-extensive human pe…	31		158	197	2006	Studies in Avian Biology
5	Accipiter gentilis	12	Toyne, EP								Breeding season diet of the Goshawk Accipiter gentilis in Wales										Information on the diet of the Goshawk Accipiter gentilis during the breeding season was collected in Wales during 1991-1993. Diet consisted mainly of birds (87%) and mammals (13%), Forty-five prey species were collected, ten of which were important in numerical or biomass terms: Feral Pigeon Columba livia, Woodpigeon Columba palumbus, Crow/Rook Corvus corone/Corvus frugilegus, Magpie Pica pica, …	140	4	569	579	1998	IBIS
6	Accipiter gentilis	10	Petty, SJ; Lurz, PWW; Rushton, SP								Predation of red squirrels by northern goshawks in a conifer forest in northern England: can this limit squirrel numbers and create a conservation dilemma's										Red squirrels (Sciurus vulgaris) have been lost from most broadleaved habitats in England due to the range expansion of grey squirrels (S. carolinensis). Currently, the main refugia for red squirrels in England are the extensive exotic conifer forests in the north. These forests are also home to an expanding population of northern goshawks (Accipiter gentilis) that were re-established in the 1970…	111	1	105	114	2003	BIOLOGICAL CONSERVATION
7	Accipiter gentilis	8	Toyne, EP								Nesting chronology of northern goshawks (Accipiter gentilis) in Wales: Implications for forest management										Northern Goshawks (Accipiter gentilis) in Wales built or refurbished nests between September and April in a semi-upland environment. Dates of first egg-laying ranged between late March and mid-May. There was no statistically significant annual difference in these dates. Most young hatched in late May and juveniles had left their nesting territories by early August. Goshawks did not tolerate distu…	70	2	121	127	1997	FORESTRY
8	Accipiter gentilis	7	Petty, Steve						Holmes, J.S.; Simons, J.R.		History of the northern goshawk Accipiter gentilis in Britain.													95	102	1996	The introduction and naturalisation of birds.
9	Accipiter gentilis	6	Toyne, EP; Ashford, RW								Blood parasites of nestling goshawks											31	1	81	83	1997	JOURNAL OF RAPTOR RESEARCH
10	Accipiter gentilis	1	Marquiss, Mick; Petty, Steve J.; Anderson, Dave I.K.; Legge, Gavin						Thompson, D.B.A.; Redpath, S.M.; Fielding, A.H.; Marquiss, M.; Galbraith, C.A.		Contrasting population trends of the northern goshawk (Accipiter gentilis) in the Scottish/English borders and north-east Scotland.													143	148	2003	Birds of prey in a changing environment. National Heritage of Scotland Vol 12.
11	Accipiter gentilis	0	Mawson, Geoff								Apparent nesting association of northern goshawks and firecrests.											103	4	243	244	2010	British Birds
12	Accipiter gentilis	0	Petty, Steve J.								An unsuccessful attempt to establish northern goshawks in Argyll.										Details are provided of an unsuccessful attempt to establish a breeding population of Northern Goshawks in Argyll with 11 birds imported from northern Europe. Birds were released in 2 batches, during 1969-1973 (8 birds) and in July-August 1980 (3 birds). One successful breeding attempt was reported following each batch of releases, in 1973 and 1982-83, and although apparently genuine, with the pa…	27		40	45	2007	Scottish Birds
13	Accipiter gentilis	0	Rollie, Chris								Hen harriers driving goshawk away from a roost.											27		71	72	2007	Scottish Birds
14	Accipiter gentilis	0	Toyne, EP; Ostroznik, H								Notes on Northern Goshawks nesting in an abandoned heronry in Wales											31	1	89	89	1997	JOURNAL OF RAPTOR RESEARCH
15	Accipiter gentilis	0	Vittery, Alan								Wing 'flick' of northern goshawk.											89	10	451	452	1996	British Birds
1	Accipiter nisus	145	HINSLEY, SA; BELLAMY, PE; NEWTON, I; SPARKS, TH				Hinsley, Shelley/E-6790-2012				HABITAT AND LANDSCAPE FACTORS INFLUENCING THE PRESENCE OF INDIVIDUAL BREEDING BIRD SPECIES IN WOODLAND FRAGMENTS										Bird species distributions in 151 woods (0.02-30 ha) in a lowland arable landscape in eastern England were investigated using logistic regression analysis. Of 31 species included in the study, only Marsh Tit Parus palustris, Nightingale Luscinia mega-rhynchos and Chiffchaff Phylloscopus collybita failed to breed in woods of <0.5 ha. For many woodland species, the probability of breeding was posit…	26	2	94	104	1995	JOURNAL OF AVIAN BIOLOGY
2	Accipiter nisus	134	NEWTON, I; MARQUISS, M				Piper, Walter/B-7908-2009				FIDELITY TO BREEDING AREA AND MATE IN SPARROWHAWKS ACCIPITER-NISUS											51	1	327	341	1982	JOURNAL OF ANIMAL ECOLOGY
3	Accipiter nisus	116	NEWTON, I								FEEDING AND DEVELOPMENT OF SPARROWHAWK ACCIPITER-NISUS NESTLINGS											184	APR	465	487	1978	JOURNAL OF ZOOLOGY
4	Accipiter nisus	113	CRESSWELL, W				Cresswell, Will/B-1472-2013				AGE-DEPENDENT CHOICE OF REDSHANK (TRINGA-TOTANUS) FEEDING LOCATION - PROFITABILITY OR RISK										1. The effect of a varying risk of predation by sparrowhawks (Accipiter nisus L.) on choice of overwinter feeding site was studied for redshank (Tringa totanus L.), on a small Scottish estuary at low tide.2. Adult and juvenile redshank segregated into two areas, a mussel bed and a salt-marsh area, respectively. Juveniles were excluded from the mussel beds by the adults, but there were no aggressi…	63	3	589	600	1994	JOURNAL OF ANIMAL ECOLOGY
5	Accipiter nisus	99	Cresswell, W				Cresswell, Will/B-1472-2013				Surprise as a winter hunting strategy in Sparrowhawks Accipiter nisus, Peregrines Falco peregrinus and merlins F-columbarius										Sparrowhawks Accipiter nisus, Peregrines Falco peregrinus and Merlins Falco columbarius were studied hunting Redshanks Tringa totanus, Dunlins Calidris alpina and Skylarks Alauda arvensis over three winters on a small Scottish estuary. Most Sparrowhawk and Merlin hunts consisted of a single attack (mean = 1.0 and 1.1, respectively), whereas Peregrine hunts often consisted of several attacks (mean…	138	4	684	692	1996	IBIS
6	Accipiter nisus	82	Newton, I; Rothery, P								Senescence and reproductive value in Sparrowhawks										A long-term study of marked individuals in a numerically stable Sparrowhawk breeding population enabled the reproductive and survival rates of females of different ages to be calculated. These estimates were then used to calculate reproductive value, the mean number of young produced by females of different ages during the rest of their lives. The data provided evidence, not only for improvement …	78	4	1000	1008	1997	ECOLOGY
7	Accipiter nisus	81	Hilton, GM; Cresswell, W; Ruxton, GD				Cresswell, Will/B-1472-2013				Intraflock variation in the speed of escape-flight response on attack by an avian predator										The benefits of flocking to prey species, whether through collective vigilance, dilution of risk, or predator confusion, depend on flock members responding in a coordinated way to attack. We videotaped sparrowhawks attacking redshank flocks to determine if there were differences in the timing of escape flights between flock members and the factors that might affect any differences. Sparrowhawks a…	10	4	391	395	1999	BEHAVIORAL ECOLOGY
8	Accipiter nisus	70	Quinn, JL; Cresswell, W				Cresswell, Will/B-1472-2013				Predator hunting behaviour and prey vulnerability										1. Game theoretic models of how animals manage predation risk have begun to describe predator responses to prey behaviour relatively recently. This is partly because our understanding of how terrestrial predators select vertebrate prey is often limited to numerical and functional responses to measures of prey abundance. Prey vulnerability, however, may improve our understanding of predation becau…	73	1	143	154	2004	JOURNAL OF ANIMAL ECOLOGY
9	Accipiter nisus	69	CRESSWELL, W; WHITFIELD, DP				Cresswell, Will/B-1472-2013				THE EFFECTS OF RAPTOR PREDATION ON WINTERING WADER POPULATIONS AT THE TYNINGHAME ESTUARY, SOUTHEAST SCOTLAND										Raptor predation on waders was studied by direct observation of raptors hunting a known wader population and subsequent recovery of dead waders. In each of three winters, raptor predation was shown to be the most significant cause of mortality in most small wader species. Sparrowhawks Accipiter nisus, Merlins Falco columbarius and Peregrines F. peregrinus attacked waders with a success rate of 11…	136	2	223	232	1994	IBIS
10	Accipiter nisus	66	MOSS, D								GROWTH OF NESTLING SPARROWHAWKS (ACCIPITER-NISUS)											187	MAR	297	314	1979	JOURNAL OF ZOOLOGY
11	Accipiter nisus	64	SPEAKMAN, JR				John, Speakman/A-9494-2008	John, Speakman/0000-0002-2457-1823			THE IMPACT OF PREDATION BY BIRDS ON BAT POPULATIONS IN THE BRITISH-ISLES										The role played by predation of birds in the mortality of British bats is assessed. A review of dietary studies and anecdotal accounts revealed eleven species of bird which occasionally feed on bats-Herring Gull Larus argentatus, Black-headed Gull Larus ridibundus, Rook Corvus frugilegus, Carrion Crow Corvus corone, Little Owl Athene noctua, Short-eared Owl Asio flammeus, Kestrel Falco tinnunculu…	21	3	123	142	1991	MAMMAL REVIEW
12	Accipiter nisus	62	Whittingham, MJ; Butler, SJ; Quinn, JL; Cresswell, W				Whittingham, Mark/C-4958-2008; Cresswell, Will/B-1472-2013; Butler, Simon/H-1703-2011				The effect of limited visibility on vigilance behaviour and speed of predator detection: implications for the conservation of granivorous passerines										Foraging animals frequently change their pattern of vigilance when they move from a patch with a clear view to one with a relatively obstructed view. This has been widely interpreted as compensation for a reduced ability to detect approaching predators in obstructed habitats. We test the extent to which changes in vigilance may compensate for the effect of reduced visibility on an animal's abilit…	106	2	377	385	2004	OIKOS
13	Accipiter nisus	60	Hilton, GM; Ruxton, GD; Cresswell, W				Cresswell, Will/B-1472-2013				Choice of foraging area with respect to predation risk in redshanks: the effects of weather and predator activity										Animals often trade off risk of predation and risk of starvation when making foraging decisions. Redshanks, Tringa totanus, wintering in an area of high sparrow-hawk, Accipiter. nisus, predation were studied to determine how simultaneous variations in energy requirements and the risk of predation determine choice of foraging area. In particular, we focus on the effects of weather on this trade-of…	87	2	295	302	1999	OIKOS
14	Accipiter nisus	58	Lindholm, AK; Thomas, RJ				Thomas, Robert/A-6612-2010; Lindholm, Anna/E-5207-2012	Thomas, Robert/0000-0001-5256-3313; Lindholm, Anna/0000-0001-8460-9769			Differences between populations of reed warblers in defences against brood parasitism					1					Two potential defences against brood parasitism by the cuckoo Cuculus canorus were compared experimentally between British populations of reed warblers Acrocephalus scirpaceus that are parasitised at different rates. (I) Rates of rejection of model cuckoo eggs were lower at two unparasitised populations which did not have resident cuckoos, than at a rarely parasitised population which had cuckoos…	137		25	42	2000	BEHAVIOUR
15	Accipiter nisus	55	NEWTON, I; MARQUISS, M								FOOD, PREDATION AND BREEDING-SEASON IN SPARROWHAWKS (ACCIPITER-NISUS)											197	JUN	221	240	1982	JOURNAL OF ZOOLOGY
16	Accipiter nisus	53	NEWTON, I								BREEDING OF SPARROWHAWKS(ACCIPITER-NISUS) IN DIFFERENT ENVIRONMENTS											45	3	831	849	1976	JOURNAL OF ANIMAL ECOLOGY
17	Accipiter nisus	49	Thomson, DL; Green, RE; Gregory, RD; Baillie, SR				Baillie, Stephen/H-3023-2013	Baillie, Stephen/0000-0001-5126-9470			The widespread declines of songbirds in rural Britain do not correlate with the spread of their avian predators										During the last 30 years, there have been marked declines in the populations of many British songbirds breeding on farmland, while two of their main predators, sparrowhawk (Accipiter nisus) and magpie (Pica pica), have spread back into areas horn which they had disappeared. The causes of the songbird declines remain unclear but given the coincidence in timing, it might appear that increased preda…	265	1410	2057	2062	1998	PROCEEDINGS OF THE ROYAL SOCIETY B-BIOLOGICAL SCIENCES
18	Accipiter nisus	49	Yasue, M; Quinn, JL; Cresswell, W				Cresswell, Will/B-1472-2013				Multiple effects of weather on the starvation and predation risk trade-off in choice of feeding location in Redshanks										1. Animals should choose the feeding habitat that allows them to meet their energy requirements while minimizing predation risk, but as weather becomes more severe, animals may choose riskier, but more profitable, feeding habitats.2. At the Tyninghame estuary, Scotland, Redshanks (Tringa totanus) chose to feed on either a mudflat or saltmarsh. Energy intake rates were 23% higher and thermoregulat…	17	6	727	736	2003	FUNCTIONAL ECOLOGY
19	Accipiter nisus	48	Cresswell, W; Hilton, GM; Ruxton, GD				Cresswell, Will/B-1472-2013				Evidence for a rule governing the avoidance of superfluous escape flights										When an imminent attack by a predator on a group of birds is signalled to non-detectors only by the departure of the detector, non-detectors ma!: make time-wasting false-alarm flights in response to mistaken or non-predator-driven departures. The frequency of false-alarm flights might be reduced if group members assess the reason for single departures before responding. Immediate Rights should on…	267	1444	733	737	2000	PROCEEDINGS OF THE ROYAL SOCIETY B-BIOLOGICAL SCIENCES
20	Accipiter nisus	48	DUCKWORTH, JW								RESPONSES OF BREEDING REED WARBLERS ACROCEPHALUS-SCIRPACEUS TO MOUNTS OF SPARROWHAWK ACCIPITER-NISUS, CUCKOO CUCULUS-CANORUS AND JAY GARRULUS-GLANDARIUS										Mounts of a Cuckoo Cuculus canorus, a Sparrowhawk Accipiter nisus and a Jay Garrulus glandarius were presented at nests of Reed Warblers Acrocephalus scirpaceus at all breeding stages. Response strength could best be classified according to approach distance (to the mount) and vocalizations used. Warblers reacted much more aggressively to a mount on the nest than to one 3 m adjacent; they approac…	133	1	68	74	1991	IBIS
21	Accipiter nisus	47	Cresswell, W; Quinn, JL				Cresswell, Will/B-1472-2013				Faced with a choice, sparrowhawks more often attack the more vulnerable prey group										Whether predators always attack the most vulnerable prey or simply attack prey that exceeds a minimum vulnerability level is an important question to answer in furthering our understanding of predator and antipredation behaviour. Predators may attack any reasonably vulnerable prey rather than waste time identifying the most vulnerable prey, particularly when prey can respond quickly to alter thei…	104	1	71	76	2004	OIKOS
22	Accipiter nisus	46	Whitfield, DP								Redshank Tringa totanus flocking behaviour, distance from cover and vulnerability to sparrowhawk Accipiter nisus predation										Over 11 winters I examined the interactions between sparrowhawk Accipiter nisus attack behaviour, the gregariousness of redshanks Tringa totanus and local geography to test hypotheses that suggest birds should flock to reduce their risk of predation and that predation risk should decline with the prey's distance from cover. Sparrowhawk attacks on redshanks feeding on beaches around the high tide …	34	2	163	169	2003	JOURNAL OF AVIAN BIOLOGY
23	Accipiter nisus	42	Quinn, John L.; Cresswell, Will				Cresswell, Will/B-1472-2013				Testing domains of danger in the selfish herd: sparrowhawks target widely spaced redshanks in flocks										The main tenet of Hamilton's 'selfish herd theory' for the evolution of group living is that individual risk of being killed upon attack by a predator is greater when relatively far from conspecifics. Here we examine the role of spacing using video analysis of encounters between redshanks, Tringa totanus, in flocks on saltmarsh, and sparrowhawks, Accipiter nisus, surprise hunting from adjacent wo…	273	1600	2521	2526	2006	PROCEEDINGS OF THE ROYAL SOCIETY B-BIOLOGICAL SCIENCES
24	Accipiter nisus	40	Jagannath, A.; Shore, R. F.; Walker, L. A.; Ferns, P. N.; Gosler, A. G.				Ferns, Peter/A-5902-2010; Shore, Richard/A-2638-2012				Eggshell pigmentation indicates pesticide contamination										1. Persistent pesticide residues remain a significant environmental pollutant, reducing breeding success of predatory birds even where such pesticides have been banned for many years. The ability to detect such residues inexpensively without destructive sampling would be a valuable tool for ecotoxicological monitoring. We suggest that assaying eggshell colour might provide such a tool.2. Recent s…	45	1	133	140	2008	JOURNAL OF APPLIED ECOLOGY
25	Accipiter nisus	38	Walther, BA; Gosler, AG				publist, CMEC/C-3010-2012				The effects of food availability and distance to protective cover on the winter foraging behaviour of tits (Aves : Parus)										To maximize fitness, many animals must trade off their need to forage efficiently against their need to avoid predators. We studied such a trade-off in four species of tits (Paridae) in a forest near Oxford, UK. During winter, tits form flocks which increase feeding efficiency and reduce predation risk. These flocks feed extensively on beech (Fagus sylvatica) seeds, the abundance of which may be …	129	2	312	320	2001	OECOLOGIA
26	Accipiter nisus	37	Watson, Mark; Aebischer, Nicholas J.; Cresswell, Will				Cresswell, Will/B-1472-2013				Vigilance and fitness in grey partridges Perdix perdix: the effects of group size and foraging-vigilance trade-offs on predation mortality										1. Vigilance increases fitness by improving predator detection but at the expense of increasing starvation risk. We related variation in vigilance among 122 radio-tagged overwintering grey partridges Perdix perdix (L.) across 20 independent farmland sites in England to predation risk (sparrowhawk Accipiter nisus L., kill rate), use of alternative antipredation behaviours (grouping and use of cove…	76	2	211	221	2007	JOURNAL OF ANIMAL ECOLOGY
27	Accipiter nisus	37	WYLLIE, I; NEWTON, I								DEMOGRAPHY OF AN INCREASING POPULATION OF SPARROWHAWKS										(1) The recolonization of an area in east-central England by sparrowhawks Accipiter nisus (L.) was studied after the local population had been eliminated, almost certainly by organochlorine pesticides. Over a 10-year period, nest numbers increased rapidly to begin with and then more slowly, with a mean rate of 21% per year. (2) Over the whole 10 years, the estimated annual survival of breeders wa…	60	3	749	766	1991	JOURNAL OF ANIMAL ECOLOGY
28	Accipiter nisus	36	MARQUISS, M; NEWTON, I								A RADIO-TRACKING STUDY OF THE RANGING BEHAVIOR AND DISPERSION OF EUROPEAN SPARROWHAWKS ACCIPITER-NISUS											51	1	111	133	1982	JOURNAL OF ANIMAL ECOLOGY
29	Accipiter nisus	35	WHITFIELD, DP								SPARROWHAWKS ACCIPITER-NISUS AFFECT THE SPACING BEHAVIOR OF WINTERING TURNSTONE ARENARIA-INTERPRES AND REDSHANK TRINGA-TOTANUS											130	2	284	287	1988	IBIS
30	Accipiter nisus	33	Cresswell, W; Lind, J; Kaby, U; Quinn, JL; Jakobsson, S				Cresswell, Will/B-1472-2013				Does an opportunistic predator preferentially attack nonvigilant prey?					4					The dilution effect as an antipredation behaviour is the main theoretical reason for grouping in animals and states that all individuals in a group have an equal risk of being predated if equally spaced from each other and the predator. Stalking predators, however, increase their chance of attack success by preferentially targeting nonvigilant individuals, potentially making relative vigilance ra…	66		643	648	2003	ANIMAL BEHAVIOUR
31	Accipiter nisus	30	MARQUISS, M; NEWTON, I								HABITAT PREFERENCE IN MALE AND FEMALE SPARROWHAWKS ACCIPITER-NISUS											124	3	324	328	1982	IBIS
32	Accipiter nisus	29	Wienburg, CL; Shore, RF				Shore, Richard/A-2638-2012				Factors influencing liver PCB concentrations in sparrowhawks (Accipiter nisus), kestrels (Falco tinnunculus) and herons (Ardea cinerea) in Britain										Large scale temporal and spatial changes in the exposure of terrestrial vertebrates to PCBs have been monitored in the UK by measuring liver residues in sparrowhawks (Accipiter nisus), kestrels (Falco tinnunculus) and grey herons (Ardea cinerea) from throughout the country. Residues in the three species are typically characterised by large intra- and inter-specific variation. Data for 306 sparrow…	132	1	41	50	2004	ENVIRONMENTAL POLLUTION
33	Accipiter nisus	27	Cresswell, W				Cresswell, Will/B-1472-2013				Selection of avian prey by wintering Sparrowhawks Accipiter nisus in southern Scotland										Sparrowhawks Accipiter nisus were studied hunting a wide range of avian species during three winters on a small Scottish estuary to determine which species were the most vulnerable to Sparrowhawk predation. Selection of avian prey was studied by comparing the proportions of different species among prey items found, with their proportions in the bird population. Certain prey species were more vuln…	83	2	381	389	1995	ARDEA
34	Accipiter nisus	27	NEWTON, I								AGE AND SITE FIDELITY IN FEMALE SPARROWHAWKS, ACCIPITER-NISUS											46	1	161	168	1993	ANIMAL BEHAVIOUR
35	Accipiter nisus	26	Davies, N. B.; Welbergen, J. A.								Cuckoo-hawk mimicry? An experimental test										The similarity between many Old World parasitic cuckoos (Cuculinae) and Accipiter hawks, in size, shape and plumage, has been noted since ancient times. In particular, hawk-like underpart barring is more prevalent in parasitic than in non-parasitic cuckoos. Cuckoo-hawk resemblance may reflect convergent evolution of cryptic plumage that reduces detection by hosts and prey, or evolved mimicry of h…	275	1644	1817	1822	2008	PROCEEDINGS OF THE ROYAL SOCIETY B-BIOLOGICAL SCIENCES
36	Accipiter nisus	25	HINSLEY, SA; BELLAMY, PE; MOSS, D				Hinsley, Shelley/E-6790-2012				SPARROWHAWK ACCIPITER-NISUS PREDATION AND FEEDING SITE SELECTION BY TITS											137	3	418	420	1995	IBIS
37	Accipiter nisus	25	Minderman, J; Lind, J; Cresswell, W				Cresswell, Will/B-1472-2013				Behaviourally mediated indirect effects: interference competition increases predation mortality in foraging redshanks										The effect of competition for a limiting resource on the population dynamics of competitors is usually assumed to operate directly through starvation, yet may also affect survival indirectly through behaviourally mediated effects that affect risk of predation. Thus, competition can affect more than two trophic levels, and we aim here to provide an example of this.We show that the foraging success…	75	3	713	723	2006	JOURNAL OF ANIMAL ECOLOGY
38	Accipiter nisus	25	NEWTON, I; MOSS, D								POSTFLEDGING SURVIVAL OF SPARROWHAWKS ACCIPITER-NISUS IN RELATION TO MASS, BROOD SIZE AND BROOD COMPOSITION AT FLEDGING											128	1	73	80	1986	IBIS
39	Accipiter nisus	25	Whitfield, DP								Predation by Eurasian sparrowhawks produces density-dependent mortality of wintering redshanks										1. This study examined annual differences in redshank Tringa totanus winter mortality caused by predation by Eurasian sparrowhawks Accipiter nisus over an 11-year period at a rocky shore in south-east Scotland.2. Redshank numbers at the beginning of a winter showed no trend over the study period and winter mortality rates also showed no temporal trend. Mean winter mortality through predation by s…	72	1	27	35	2003	JOURNAL OF ANIMAL ECOLOGY
40	Accipiter nisus	24	WALKER, CH; NEWTON, I; HALLAM, SD; RONIS, MJJ								ACTIVITIES AND TOXICOLOGICAL SIGNIFICANCE OF HEPATIC-MICROSOMAL ENZYMES OF THE KESTREL (FALCO-TINNUNCULUS) AND SPARROWHAWK (ACCIPITER-NISUS)											86	2	379	382	1987	COMPARATIVE BIOCHEMISTRY AND PHYSIOLOGY C-PHARMACOLOGY TOXICOLOGY & ENDOCRINOLOGY
41	Accipiter nisus	22	COOKE, AS								CHANGES IN EGG-SHELL CHARACTERISTICS OF THE SPARROWHAWK (ACCIPITER-NISUS) AND PEREGRINE (FALCO-PEREGRINUS) ASSOCIATED WITH EXPOSURE TO ENVIRONMENTAL POLLUTANTS DURING RECENT DECADES											187	FEB	245	263	1979	JOURNAL OF ZOOLOGY
42	Accipiter nisus	22	GEER, T								FACTORS AFFECTING THE DELIVERY OF PREY TO NESTLING SPARROWHAWKS (ACCIPITER, NISUS)											195	SEP	71	80	1981	JOURNAL OF ZOOLOGY
43	Accipiter nisus	22	Newton, I; Wyllie, I; Dale, L								Trends in the numbers and mortality patterns of sparrowhawks (Accipiter nisus) and kestrels (Falco tinnunculus) in Britain, as revealed by carcass analyses					2					The numbers of sparrowhawks Accipiter nisus received for study at Monks Wood Research Station increased greatly between 1963 and 1992, then declined by 50% in 1992-97. The long-term increase reflected the national population recovery over this period and followed the reduction in the use of organochlorine pesticides. It was most marked in the eastern parts of Britain where the earlier population …	248		139	147	1999	JOURNAL OF ZOOLOGY
44	Accipiter nisus	22	Whitfield, DP; Cresswell, W; Ashmole, NP; Clark, NA; Evans, AD				Cresswell, Will/B-1472-2013				No evidence for Sparrowhawks selecting Redshanks according to size or condition										During a 10-year study at two adjacent Scottish sites we tested the null hypotheses that Sparrowhawks Accipiter sisus selected overwintering Redshanks Tringa totanus independently of body size and condition, There was no significant difference in wing length, leg length and bill length between Redshanks killed by Sparrowhawks and the Redshank population as assessed from cannon-netted samples. On …	30	1	31	39	1999	JOURNAL OF AVIAN BIOLOGY
45	Accipiter nisus	21	Cresswell, Will; Lind, Johan; Quinn, John L.				Cresswell, Will/B-1472-2013				Predator-hunting success and prey vulnerability: quantifying the spatial scale over which lethal and non-lethal effects of predation occur										P>1. The shape of the function linking predator-attack success rate with distance to predator-concealing cover, or prey refuge, will affect population dynamics, distribution patterns and community trophic structure. Theory predicts that predator-attack success should decline exponentially with distance from predator-concealing cover, resulting in a threshold distance value above which there is li…	79	3	556	562	2010	JOURNAL OF ANIMAL ECOLOGY
46	Accipiter nisus	20	Newton, I; Dale, L; Rothery, P								Apparent lack of impact of Sparrowhawks on the breeding densities of some woodland songbirds					2					Counts of singing male songbirds on Bookham Common (southeast England), conducted almost every year from 1949 to 1979, covered the periods of Sparrowhawk decline and recovery. We examined these counts for evidence of an influence of Sparrowhawk predation on the breeding densities of their songbird prey. Of 13 species examined, no convincing evidence of Sparrowhawk effects was found. However most …	44		129	135	1997	BIRD STUDY
47	Accipiter nisus	20	WYLLIE, I								POST-FLEDGING PERIOD AND DISPERSAL OF YOUNG SPARROWHAWKS ACCIPITER-NISUS											32	NOV	196	198	1985	BIRD STUDY
48	Accipiter nisus	19	GEER, TA								THE SELECTION OF TITS PARUS SPP BY SPARROWHAWKS ACCIPITER-NISUS											124	2	159	167	1982	IBIS
49	Accipiter nisus	19	Sibly, RM; Newton, I; Walker, CH								Effects of dieldrin on population growth rates of sparrowhawks 1963-1986										1. A recent reappraisal of the evidence of the effects of cyclodiene insecticides on sparrowhawks Accipiter nisus and kestrels Falco tinnunculus in Britain suggested that during 1963-75 at least 29% of sparrowhawks found in an eastern area of high cyclodiene use died directly from dieldrin poisoning, compared with only 6% in a more western area of low cyclodiene use. Here, these data are used in …	37	3	540	546	2000	JOURNAL OF APPLIED ECOLOGY
50	Accipiter nisus	17	Cresswell, Will; Whitfield, D. Philip				Cresswell, Will/B-1472-2013				How starvation risk in Redshanks Tringa totanus results in predation mortality from Sparrowhawks Accipiter nisus										Redshanks Tringa totanus that are preyed upon by Sparrowhawks Accipiter nisus at the Tyninghame Estuary, Firth of Forth, Scotland, provide an example of how the starvation-predation risk trade-off results in mortality. In this trade-off, animals cannot always optimize anti-predation behaviour because anti-predation behaviours, such as avoiding predators, are usually incompatible with foraging beh…	150		209	218	2008	IBIS
51	Accipiter nisus	17	Erry, BV; Macnair, MR; Meharg, AA; Shore, RF; Newton, I				Shore, Richard/A-2638-2012				Arsenic residues in predatory birds from an area of Britain with naturally and anthropogenically elevated arsenic levels										Birds of prey forage over large areas and so might be expected to accumulate contaminants which are elevated but heterogeneously distributed in the general environment. The aim of this study was to test the hypothesis that arsenic levels in raptors from a region with elevated environmental arsenic concentrations were higher than those in birds from an uncontaminated part of Britain. Arsenic conce…	106	1	91	95	1999	ENVIRONMENTAL POLLUTION
52	Accipiter nisus	17	Newton, I								Causes and consequences of breeding dispersal in the Sparrowhawk Accipiter nisus										Most Sparrowhawks Accipiter nisus were present on particular territories for only one breeding season, but others were present on the same territory for up to eight seasons. Short periods of occupancy were due partly to mortality and partly to about one third of surviving birds of both sexes changing territories between one breeding season and the next. The mean number of territories used per ind…	89	1	143	154	2001	ARDEA
53	Accipiter nisus	17	NEWTON, I; MARQUISS, M				Piper, Walter/B-7908-2009				REMOVAL EXPERIMENTS AND THE LIMITATION OF BREEDING DENSITY IN SPARROWHAWKS										(1) When the breeding population had settled, female sparrowhawks were removed from seven different nesting territories, and males from seven other territories in southern Scotland. In the same season, three of the removed females were subsequently replaced by other females, and three of four of the males were replaced by other males.(2) All three replacement females laid eggs, but only one (the …	60	2	535	544	1991	JOURNAL OF ANIMAL ECOLOGY
54	Accipiter nisus	17	Newton, I; Rothery, P								Age-related trends in the breeding success of individual female Sparrowhawks Accipiter nisus										Overall, female Sparrowhawks improved in the mean number of young they raised per year up to the 5th year of life, and then declined. An attempt is made to find to what extent this mean trend is caused by similar trends in the breeding of individual females, and to what extent to the progressive appearance and disappearance of high performing females among breeders of different ages. It is conclu…	86	1	21	31	1998	ARDEA
55	Accipiter nisus	17	NEWTON, I; WYLLIE, I; ROTHERY, P								ANNUAL SURVIVAL OF SPARROWHAWKS ACCIPITER-NISUS BREEDING IN 3 AREAS OF BRITAIN										Annual survival of breeding female Sparrowhawks Accipiter nisus was estimated by a capture-recapture procedure in three different areas, Eskdale and Annandale in southern Scotland and Rockingham Forest in east-central England. In Eskdale, where the breeding population remained fairly stable during a 19-year study, annual survival averaged 59% (s.e. = 4%). In Annandale, where the breeding populati…	135	1	49	60	1993	IBIS
56	Accipiter nisus	16	FRUMKIN, R								INTRASPECIFIC BROOD-PARASITISM AND DISPERSAL IN FLEDGLING SPARROWHAWKS ACCIPITER-NISUS										The progeny of early-nesting Sparrowhawks Accipiter nisus have a higher survival rate than those of late nesters. To ascertain the reasons for greater survival in early-season Sparrowhawk fledglings, I studied post-fledging dispersal behaviour in this species by direct observations and radio-tracking during 3 years in Rockingham Forest, Northamptonshire, U.K.Post-fledging brood-parasitism was fou…	136	4	426	433	1994	IBIS
57	Accipiter nisus	15	Newton, I; Rothery, P								Post-fledging recovery and dispersal of ringed Eurasian Sparrowhawks Accipiter nisus										Ring recoveries were used to explore the effect of early experience on the subsequent survival and dispersal of young Sparrowhawks in two areas in south Scotland. Young raised on high grade territories were recovered in greater proportion than young on low grade territories, implying that they had survived better after leaving the nest. Recovery rate tended to decline with increasing elevation of…	31	2	226	236	2000	JOURNAL OF AVIAN BIOLOGY
58	Accipiter nisus	14	Newton, I; Rothery, P								Age-related trends in different aspects of the breeding performance of individual female Eurasian Sparrowhawks (Accipiter nisus)										Age-related trends in breeding performance of female Eurasian Sparrow-hawks (Accipiter nisus) were examined in south Scotland. Over a 22 year period, most individuals were banded and of known age. Previous analyses had shown that average number of young raised per breeding attempt (or year) increased progressively in successive age-groups to midlife (around five years) and declined thereafter. He…	119	3	735	748	2002	AUK
59	Accipiter nisus	13	Cresswell, Will; Quinn, John L.				Cresswell, Will/B-1472-2013				Predicting the optimal prey group size from predator hunting behaviour										P>1. How group size affects predator attack and success rate, and so prey vulnerability, is important in determining the nonlethal consequences of predation risk on animal populations and communities. Theory predicts that both predator attack success rate and the dilution effect decline exponentially with group size and that selection generates optimal group sizes at a 'risk threshold' above whic…	80	2	310	319	2011	JOURNAL OF ANIMAL ECOLOGY
60	Accipiter nisus	13	Newton, I; Rothery, P; Wyllie, I								Age-related survival in female Sparrowhawks Accipiter nisus										Long-term capture-recapture of female Sparrowhawks Accipiter nisus nesting in three different areas enabled age-related survival rates to be calculated, after correcting for age-related and annual variations in recapture frequency The data provided strong evidence for an improvement in survival rates in the first 3 years of life and for a decline in the last 5-6 years, during a maximum life span …	139	1	25	30	1997	IBIS
61	Accipiter nisus	12	ASHFORD, RW; WYLLIE, I; NEWTON, I								LEUCOCYTOZOON-TODDI IN BRITISH SPARROWHAWKS ACCIPITER-NISUS - OBSERVATIONS ON THE DYNAMICS OF INFECTION											24	5	1101	1107	1990	JOURNAL OF NATURAL HISTORY
62	Accipiter nisus	12	NEWTON, I; WYLLIE, I								FIDELITY TO NESTING TERRITORY AMONG EUROPEAN SPARROWHAWKS IN 3 AREAS										In three separate study areas, two in south Scotland and one in east-central England, about 70% of European Sparrowhawks (Accipiter nisus) trapped in successive years had stayed on the same nesting territory, while the remaining 30% had changed territories between one breeding season and the next. Comparing age-groups, the frequency of territory changes was greatest in 1-2 year birds and became p…	26	3	108	114	1992	JOURNAL OF RAPTOR RESEARCH
63	Accipiter nisus	12	Park, Kirsty J.; Graham, Kate E.; Calladine, John; Wernham, Chris W.								Impacts of birds of prey on gamebirds in the UK: a review										The influence of predators on the distribution, density and dynamics of their prey species has long been of interest to ecologists and wildlife managers. Where the prey population is also utilized by humans, conflicts may arise through competition for a limited resource. Because gamebird shooting in the UK provides employment, recreation and income, the impact of birds of prey on gamebird populat…	150		9	26	2008	IBIS
64	Accipiter nisus	11	Newton, I; Rothery, P								Estimation and limitation of numbers of floaters in a Eurasian Sparrowhawk population										Over a 20-year period, the numbers of Eurasian Sparrowhawk Accipiter nisus nests found in a 200 km(2) area in south Scotland remained relatively stable (mean 33.3 pairs, CV = 10.6%). Nest numbers fluctuated from year to year in a manner expected of a population subject to density-dependent regulation. The numbers of non-breeders (floaters) could not be counted directly, but the number of female f…	143	3	442	449	2001	IBIS
65	Accipiter nisus	11	WYLLIE, I; NEWTON, I								LATITUDINAL VARIATION IN THE BODY-SIZE OF SPARROWHAWKS ACCIPITER-NISUS WITHIN BRITAIN										On the basis of Sparrowhawks Accipiter nisus found dead in various parts of Britain during 1979-1991, wing-length was found to provide the most reliable index of overall body-size because it gave the best and most consistent correlations with five other measures of body-size.A marked latitudinal trend in the body-size of Sparrowhawks was found within Britain, with birds of each sex and age group …	136	4	434	440	1994	IBIS
66	Accipiter nisus	10	Gaston, Kevin J.; Blackburn, Tim M.; Gregory, Richard D.								Intraspecific abundance-occupancy relationships: case studies of six bird species in Britain.										Although acknowledged to be common, intraspecific relationships between local abundance and site occupancy have been examined in detail for few species. Here we report such analyses for six widespread species of breeding birds in Britain, using data from the Common Birds Census. These exhibit a range of temporal trends, including different combinations of increase and decrease in abundance and oc…	5	5	197	212	1999	Diversity and Distributions
67	Accipiter nisus	10	Newson, Stuart E.; Rexstad, Eric A.; Baillie, Stephen R.; Buckland, Stephen T.; Aebischer, Nicholas J.				Buckland, Stephen/A-1998-2012; Baillie, Stephen/H-3023-2013	Baillie, Stephen/0000-0001-5126-9470			Population change of avian predators and grey squirrels in England: is there evidence for an impact on avian prey populations?										P>1. Using novel analytical methods applied to extensive national bird and mammal monitoring data, we examine whether 29 English bird populations may have been depressed by increases in the abundance of two broad categories of predators. The first includes predators of juvenile and adult birds: Eurasian sparrowhawks Accipiter nisus, common kestrels Falco tinnunculus and common buzzards Buteo bute…	47	2	244	252	2010	JOURNAL OF APPLIED ECOLOGY
68	Accipiter nisus	10	Walker, CH; Newton, I								Effects of cyclodiene insecticides on the sparrowhawk (Accipiter nisus) in Britain - a reappraisal of the evidence										Cyclodiene insecticides were introduced in Britain in the mid-1950s, after which there was a rapid decline of sparrowhawk populations in agricultural areas associated with the lethal toxicity of these compounds. Subsequently the recovery of sparrowhawk populations was studied in different areas of Britain following the ban on dieldrin seed dressings in 1975. Frequency distribution diagrams of die…	7	4	185	189	1998	ECOTOXICOLOGY
69	Accipiter nisus	8	Cresswell, Will; Lind, Johan; Quinn, John L.; Minderman, Jeroen; Whitfield, D. Philip				Cresswell, Will/B-1472-2013				Ringing or colour-banding does not increase predation mortality in redshanks Tringa totanus										The use of metal and colour-rings or bands as a means of measuring Survival, movements and behaviour in birds is universal and fundamental to testing ecological and evolutionary theories. The practice rests on the largely untested assumption that the rings do not affect survival. However this assumption may not hold for several reasons, for example because the 'oddity effect' predicts predators s…	38	3	309	316	2007	JOURNAL OF AVIAN BIOLOGY
70	Accipiter nisus	7	Bell, Christopher P.; Baker, Sam W.; Parkes, Nigel G.; Brooke, M. De L.; Chamberlain, Dan E.								THE ROLE OF THE EURASIAN SPARROWHAWK (ACCIPITER NISUS) IN THE DECLINE OF THE HOUSE SPARROW (PASSER DOMESTICUS) IN BRITAIN										We compared the pronounced geographic pattern in the recolonization of Britain by the Eurasian Sparrowhawk (Accipiter nisus) from 1970 onward with the spatiotemporal pattern among House Sparrow (Passer domesticus) populations over the same period, using data on the occurrence of both species at garden feeding stations. Using a simulation of House Sparrow population trends based on a logistic mode…	127	2	411	420	2010	AUK
71	Accipiter nisus	7	Chamberlain, D. E.; Glue, D. E.; Toms, M. P.				Toms, Mike/E-7252-2011				Sparrowhawk Accipiter nisus presence and winter bird abundance										The decline and subsequent re-colonisation of the Sparrowhawk Accipiter nisus in the UK has allowed an examination of its potential impacts on passerine abundance through analysis of long-term garden bird monitoring data. Weekly counts in gardens in winter have been collected annually since the early 1970s, a period when Sparrowhawks were initially rare but recolonised to a point in the 1990s whe…	150	1	247	254	2009	JOURNAL OF ORNITHOLOGY
72	Accipiter nisus	7	Cresswell, W.; Clark, J. A.; Macleod, R.				Cresswell, Will/B-1472-2013				How climate change might influence the starvation-predation risk trade-off response										Climate change within the UK will affect winter starvation risk because higher temperatures reduce energy budgets and are likely to increase the quality of the foraging environment. Mass regulation in birds is a consequence of the starvation-predation risk trade-off: decreasing starvation risk because of climate change should decrease mass, but this will be countered by the effects of predation r…	276	1672	3553	3560	2009	PROCEEDINGS OF THE ROYAL SOCIETY B-BIOLOGICAL SCIENCES
73	Accipiter nisus	7	Proffitt, FM; Newton, I; Wilson, JD; Siriwardena, GM								Bullfinch Pyrrhula pyrrhula breeding ecology in lowland farmland and woodland: comparisons across time and habitat										Bullfinch Pyrrhula pyrrhula populations decreased by 33% in Britain over the years 1977-82, the period of steepest decline. The timing of this decline and its greater severity on farmland (-65%) than in woodland (-28%) point to agricultural intensification as a likely environmental cause, but previous analyses of survival rate and breeding success data have not been able to identify a clear demog…	146		78	86	2004	IBIS
74	Accipiter nisus	5	Cresswell, Will; Quinn, John L.				Cresswell, Will/B-1472-2013				Attack frequency, attack success and choice of prey group size for two predators with contrasting hunting strategies										The selective benefits of living in groups may increase with group size but this will depend on predator species or hunting mode. We tested whether the strength of selection for flock size in redshanks, Tringa totanus, depended on hunting mode used by sparrowhawks, Accipiter nisus, and peregrine falcons, Falco peregrinus. Sparrowhawks prefer to ambush prey from cover, whereas peregrines normally …	80	4	643	648	2010	ANIMAL BEHAVIOUR
75	Accipiter nisus	5	Marquiss, Mick								Seasonal pattern in hawk predation on common Bullfinches Pyrrhula pyrrhula: evidence of an interaction with habitat affecting food availability					1					Capsule Where predators occur, Bullfinch populations are probably limited as much by landscape structure as by the abundance of key food species.Aims To explore the interaction between food, cover and predation by comparing the seasonal patterns of the foraging behaviour of Common Bullfinches, with their frequency in the diet of Eurasian Sparrowhawks Accipiter nisus.Methods Foraging Bullfinches w…	54		1	11	2007	BIRD STUDY
76	Accipiter nisus	5	NEWTON, I; MARQUISS, M								EYE COLOR, AGE AND BREEDING PERFORMANCE IN SPARROWHAWKS ACCIPITER-NISUS											29	NOV	195	200	1982	BIRD STUDY
77	Accipiter nisus	4	Barton, NW; Houston, DC								Factors influencing the size of some internal organs in raptors										The size of the small intestine, stomach, kidney, liver and heart were compared among raptor species and considered in relation to hunting strategy and body size. Species relying on rapid acceleration and maneuverability to capture prey in flight, such as sparrowhawk (Accipiter nisus), goshawk (A. gentilis), and peregrine (Fake peregrinus), had the smallest digestive tracts for their size. Specie…	30	4	219	223	1996	JOURNAL OF RAPTOR RESEARCH
78	Accipiter nisus	4	Wyllie, I; Newton, I								Use of carcasses to estimate the proportions of female Sparrowhawks and Kestrels which bred in their first year of life											141	3	504	506	1999	IBIS
79	Accipiter nisus	3	Mallord, John W.; Orsman, Christopher J.; Cristinacce, Andrew; Butcher, Nigel; Stowe, Tim J.; Charman, Elisabeth C.								Mortality of Wood Warbler Phylloscopus sibilatrix nests in Welsh Oakwoods: predation rates and the identification of nest predators using miniature nest cameras										Capsule Predation was the main cause of nest failure, but predation rates have remained unchanged since the 1980s. Eurasian Jays Garrullus glandarius were the most common predator.Aims To quantify, and compare, nest predation rates for 1982-84 and 2009-11, and to identify predators of Wood Warbler Phylloscopus sibilatrix nests in Welsh oakwoods.Methods During 2009-11, 167 Wood Warbler nests were …	59	3	286	295	2012	BIRD STUDY
80	Accipiter nisus	3	Newton, Ian						Meyburg, B.-U.; Chancellor, R.D.; Ferrero, J.J.		The role of the individual bird and the individual territory in the population biology of sparrowhawks Accipiter nisus.													117	129	1998	Holarctic birds of prey. Proceedings of an international conference. Actas del Congreso Internacional sobre Rapaces del Holartico. Badajoz, Extremadura (Spain), 17-22 Abril 1995.
81	Accipiter nisus	3	Walker, Colin H.						van Emden, Helmut F.; Rothschild, Miriam		Organochlorine insecticides and raptors in Britain.													133	145	2004	Insect and bird interactions.
82	Accipiter nisus	3	Weekley, David R.								Eurasian sparrowhawk drowning Eurasian jay.											90	11	524	524	1997	British Birds
83	Accipiter nisus	3	Young, George R.; Dawson, Alistair; Newton, Ian; Walker, Lee				Young, George/C-6733-2009; Dawson, Alistair/B-4221-2012	Young, George/0000-0002-1203-588X;			The timing of gonadal development and moult in three raptors with different breeding seasons: effects of gender, age and body condition										Differences between species in breeding seasons are thought to be mediated through differences in their reproductive physiology. Little is known about how the timing and duration of gonadal maturation varies between raptor species, how the timing of moult relates to the gonadal cycle, whether the timing and degree of sexual maturation varies between juveniles and adults or whether body condition …	151	4	654	666	2009	IBIS
84	Accipiter nisus	2	Newton, I.						Bird, David M.; Varland, Daniel E.; Negro, Juan Jose		Sparrowhawks in conifer plantations.													191	199	1996	Raptors in human landscapes: adaptations to built and cultivated environments.
85	Accipiter nisus	2	Stoate, C; Thomson, DL						Aebischer, NJ; Evans, AD; Grice, PV; Vickery, JA		Predation and songbird populations										In order to consider whether the widespread declines of British songbirds may be linked with the spread of their avian predators, we provide an overview of two studies. In one, the abundance of Magpies Pica pica and Carrion Crows Corvus corone were manipulated at three farms in Leicestershire and the breeding success and abundance of songbirds was studied. In the other, extensive historical data …			134	139	2000	ECOLOGY AND CONSERVATION OF LOWLAND FARMLAND BIRDS
86	Accipiter nisus	2	Summers-Smith, J. Denis								Changes in the house sparrow population in Britain.										The number of House Sparrows has declined markedly in mid-latitude western Europe in the last 25-30 years. This was first noticed in Britain in farmland about 1979, though after a fall of about 60% the population appears to have stabilised at this lower level. It is now generally accepted that this decline was a consequence of reduction in the availability of food resulting from intensification o…	30		23	37	2005	International Studies on Sparrows
87	Accipiter nisus	2	Whitfield, DP								Density-dependent mortality of wintering Dunlins Calidris alpina through predation by Eurasian Sparrowhawks Accipiter nisus										Density-dependent mortality in wintering shorebirds is critical to shorebird population dynamics, but is difficult to study and demonstrate. Most winter mortality of small shorebirds probably results from predation by raptors. Over 13 winters, I studied Eurasian Sparrowhawk Accipiter nisus predation on wintering Dunlins Calidris alpina at a rocky shore in south-east Scotland, a site apparently of…	145	3	432	438	2003	IBIS
88	Accipiter nisus	1	Cresswell, Will; Quinn, John L.				Cresswell, Will/B-1472-2013				Contrasting risks from different predators change the overall nonlethal effects of predation risk										Prey are often at risk from multiple predator species with differing hunting modes, but the resulting response to the spatial variation in predation risk (the landscape of fear) has rarely been considered in predator prey models. We tested whether attack frequency and hunting success along a habitat gradient (distance from an estuarine shoreline) differed between 2 predators hunting a single prey…	24	4	871	876	2013	BEHAVIORAL ECOLOGY
89	Accipiter nisus	1	Drew, Cicely C.								Eurasian sparrowhawk drowning magpie.											90	11	524	525	1997	British Birds
90	Accipiter nisus	1	Quinn, John L.; Cresswell, Will				Cresswell, Will/B-1472-2013				Local prey vulnerability increases with multiple attacks by a predator										Theory and empirical evidence suggest that predator activity makes prey more wary and less vulnerable to predation. However if at least some prey in the population are energetically or spatially constrained, then predators may eventually increase local prey vulnerability because of the cumulative costs of anti-predation behaviour. We tested whether repeated attacks by a predator might increase pr…	121	8	1328	1334	2012	OIKOS
91	Accipiter nisus	1	Walker, CH; Newton, I								Effects of cyclodiene insecticides on raptors in Britain (vol 7, pg 185, 1998)											8	6	425	429	1999	ECOTOXICOLOGY
92	Accipiter nisus	1	Wells, Jill								Eurasian sparrowhawk drowning common starling.											90	11	525	525	1997	British Birds
93	Accipiter nisus	1	Wyllie, Ian								The return of the sparrowhawk in Rockingham Forest.											1995		66	70	1995	Northamptonshire Bird Report
94	Accipiter nisus	0	Archer, Michael G.								Male sparrowhawk apparently preying on swift.											41		40	41	2005	Sorby Record
95	Accipiter nisus	0	Ashford, R.W.			British Ornithologists' Union					Blood parasites in the life of the sparrow hawk Accipiter nisus.													3pp.	3pp.	1999	Diseases and parasites of birds. Autumn Scientific Meeting, 8th to 10th, September 1993. Madingley Hall, Cambridge.
96	Accipiter nisus	0	Bloomfield, Andrew								Hunting technique used by Eurasian sparrowhawk attempting to catch a common swift.											99	7	368	368	2006	British Birds
97	Accipiter nisus	0	Burden, K.								Urban sparrowhawks.											39		14	15	2003	Yorkshire Naturalists Union Bulletin
98	Accipiter nisus	0	Burden, Kenneth								Some observations of the hunting techniques of the sparrowhawk.											42		14	14	2004	Yorkshire Naturalists Union Bulletin
99	Accipiter nisus	0	Capps, Ken								Green woodpecker chasing Eurasian sparrowhawk.											95	1	24	24	2002	British Birds
100	Accipiter nisus	0	Carter, Robin								Female Eurasian sparrowhawk catching a Eurasian collared dove in flight and drowning it.											5		63	64	1999	Magpie
101	Accipiter nisus	0	Christie, David A.; Christie, Carmelia M.								Eurasian sparrowhawk taking insects in flight.											95	10	531	531	2002	British Birds
102	Accipiter nisus	0	Cinderey, RN								Female Eurasian sparrowhawk caching prey.											24	1	41	41	2003	Scottish Birds
103	Accipiter nisus	0	Cresswell, Will	Chancellor, R.D.; Meyburg, B.-U.							Kleptoparasitism rates and aggressive interactions between raptors.										Kleptoparasitism between raptor species may determine raptor occurrence but there are few data on kleptoparasitism rates. Sparrowhawks, Merlins, Peregrines and Kestrels were observed catching 181 birds on a Scottish estuary. Other raptors and carrion crows attempted to steal the prey on 11% and 28% of the occasions respectively, resulting in a rate of prey loss due to kleptoparasitism by raptors …			805	813	2004	Raptors worldwide: proceedings of the VI World Conference on Birds of Prey and Owls, Budapest, Hungary, 18-23 May 2003.
104	Accipiter nisus	0	Dickson, R.C.								Common kestrel robbing Eurasian sparrowhawk.											93	1	42	42	2000	British Birds
105	Accipiter nisus	0	Dickson, R.C.								Eurasian sparrowhawk attacking red squirrels.											27		77	77	2007	Scottish Birds
106	Accipiter nisus	0	Dickson, R.C.								Hunting times of sparrowhawks in the non breeding season.											19	3	174	175	1998	Scottish Birds
107	Accipiter nisus	0	Dickson, R.C.								Little egret attacked by a Eurasian sparrowhawk.											25		56	56	2005	Scottish Birds
108	Accipiter nisus	0	Dickson, R.C.								Prey species attacked and captured by Eurasian sparrowhawks outside the breeding season.											22	1	62	63	2001	Scottish Birds
109	Accipiter nisus	0	Dickson, R.C.								Raptors perching in close proximity.											95	2	86	86	2002	British Birds
110	Accipiter nisus	0	Dolphin, Alan K.								Eurasian sparrowhawks repeatedly using same nest.											93	1	40	41	2000	British Birds
111	Accipiter nisus	0	Fathers, Jason								Polygyny in the Eurasian sparrowhawk.											99	5	265	266	2006	British Birds
112	Accipiter nisus	0	Hood, Dan								Female Eurasian sparrowhawk caching prey.											23	1	53	53	2002	Scottish Birds
113	Accipiter nisus	0	Hopton, M.R.; Richardson, D.A.								Eurasian sparrowhawk apparently eating insects in flight.											90	9	357	358	1997	British Birds
114	Accipiter nisus	0	Hughes, J.; Sharp, E.; Taylor, M. J.; Melton, L.; Hartley, G.								Monitoring agricultural rodenticide use and secondary exposure of raptors in Scotland										Despite the documented risk of secondary poisoning to non-target species by anticoagulant rodenticides there is no statutory post-approval monitoring of their use in the UK. This paper presents results from two Scottish monitoring schemes for the period 2000-2010; recording rodenticide use on arable farms and the presence of residues in raptor carcasses. More than three quarters of arable farms u…	22	6	974	984	2013	ECOTOXICOLOGY
115	Accipiter nisus	0	Hull, Susan L.								Alarm calls and predator discrimination in populations of the house sparrow Passer domesticus in Leeds.											123	1024	19	24	1998	Naturalist (Sheffield)
116	Accipiter nisus	0	Jones, Maurice								Eurasian sparrowhawk entering building.											91	7	282	282	1998	British Birds
117	Accipiter nisus	0	Langton, Tom								A sparrowhawk Accipiter nisus mortality incident and the potential impacts on wildlife from on and off shore wind turbines in Suffolk.											47		55	59	2012	Suffolk Natural History
118	Accipiter nisus	0	Lewis, Dewi E.								Unusual hunting behaviour by sparrowhawk.											3	3	211	211	2002	Welsh Birds
119	Accipiter nisus	0	Main, Iain								Eurasian sparrowhawk taking nestling song thrushes.											103	5	303	303	2010	British Birds
120	Accipiter nisus	0	Montier, David J.								Male Eurasian sparrowhawk waiting for prey to become accessible.											93	1	41	41	2000	British Birds
121	Accipiter nisus	0	Moore, P.R.								Interaction between sparrowhawk and jackdaw near Newtonmore, Highland.											19	2	125	126	1997	Scottish Birds
122	Accipiter nisus	0	Needle, K.; Dougall, T.W.								Female Eurasian sparrowhawk caching prey.											22	2	104	104	2001	Scottish Birds
123	Accipiter nisus	0	Newton, I.						Sharma, B.D.		A 20 year study of sparrow hawks in Britain. (A guest contribution on the Indian genus : Accipiter).													134	143	1999	Indian wildlife resources ecology and development. (A study of ecology, conservation, economic and applied aspects of Indian wildlife resources).
124	Accipiter nisus	0	Newton, I.; Wyllie, I.								Monogamy in the sparrowhawk.											6		249	267	1996	Oxford Ornithology Series
125	Accipiter nisus	0	Newton, Ian								Highlights from a long-term study of sparrowhawks.										The numbers of Eurasian Sparrowhawks Accipiter nisus that breed in any landscape depend primarily on the amount of woodland, but within that woodland breeding densities vary with the prey supply. In continuous woodland, pairs space themselves regularly, but more widely in areas where prey are scarce. In particular areas, providing that the environment remains stable, breeding numbers remain fairl…	101	11	607	623	2008	British Birds
126	Accipiter nisus	0	Niemann, Sarah; Niemann, Derek; Odell, Dave								Eurasian sparrowhawk attacking soprano pipistrelle bat.											100	6	383	383	2007	British Birds
127	Accipiter nisus	0	Paice, Michael R.; Glaves, Peter								A study of the sparrowhawk Accipiter nisus and the kestrel Falco tinnunculus in an urban environment.											76		133	152	1997	London Naturalist
128	Accipiter nisus	0	Paterson, Gavin; Paterson, Alan								Persistent searching for prey by Eurasian sparrowhawk.											96	12	653	654	2003	British Birds
129	Accipiter nisus	0	Radford, A.P.								Eurasian sparrowhawk extracting great tit from feeding cage.											95	3	141	141	2002	British Birds
130	Accipiter nisus	0	Ralston, Craig								Eurasian sparrowhawk drowning corn bunting.											90	11	525	525	1997	British Birds
131	Accipiter nisus	0	Robertson, Derek								Hunting behaviour of raptors targeting hirundine flocks.											32	2	134	135	2012	Scottish Birds
132	Accipiter nisus	0	Sage, Bryan								Unusual feeding behaviour by Eurasian sparrowhawks.											102	7	405	405	2009	British Birds
133	Accipiter nisus	0	Sellers, Robin M.								Two carrion crows robbing a Eurasian sparrowhawk of its prey.											29	3	225	225	2009	Scottish Birds
134	Accipiter nisus	0	Sharrock, J.T.R.								Persistent attacks by Eurasian Sparrowhawk on Eurasian Jays.											106	7	413	414	2013	British Birds
135	Accipiter nisus	0	Shawyer, Colin R.; Clarke, Roger; Dixon, Nicholas						Thompson, D.B.A.; Redpath, S.M.; Fielding, A.H.; Marquiss, M.; Galbraith, C.A.		Causes of racing pigeon (Columba livia) losses, including predation by raptors, in the United Kingdom.													263	268	2003	Birds of prey in a changing environment. National Heritage of Scotland Vol 12.
136	Accipiter nisus	0	Shrubb, Michael								Raptors feeding on flying insects.											3	5	343	343	2003	Welsh Birds
137	Accipiter nisus	0	Stirling-Aird, Patrick								Letter: hunting behaviour of raptors targeting hirundine flocks.											32	3	220	220	2012	Scottish Birds
138	Accipiter nisus	0	Thornton, Michael; Coventry, Hugh; Coventry, Laura								Sparrowhawk nest predation by carrion crow - unique footage recorded from a nest camera.											32	1	32	34	2012	Scottish Birds
139	Accipiter nisus	0	Vedder, Oscar; Bouwhuis, Sandra; Sheldon, Ben C.								The contribution of an avian top predator to selection in prey species										Natural selection can vary in magnitude, form and direction, yet the causes of selection, and of variation in selection, are poorly understood.We quantified the effect of a key predator (Eurasian sparrowhawks) on selection on fledging body mass in two bird species (blue tits and great tits). By partitioning selection into within- and between-brood components, we were able to separate individual f…	83	1	99	106	2014	JOURNAL OF ANIMAL ECOLOGY
140	Accipiter nisus	0	Whitfield, D. Philip						Thompson, D.B.A.; Redpath, S.M.; Fielding, A.H.; Marquiss, M.; Galbraith, C.A.		The effects of predation by sparrowhawks (Accipiter nisus) on the behaviour and population dynamics of wintering redshanks (Tringa totanus).													269	273	2003	Birds of prey in a changing environment. National Heritage of Scotland Vol 12.
141	Accipiter nisus	0	Woodruff, Peter								Hunting strategy of Eurasian sparrowhawk.											98	1	46	46	2005	British Birds
1	Acrocephalus palustris	49	KELSEY, MG								A COMPARISON OF THE SONG AND TERRITORIAL BEHAVIOR OF A LONG-DISTANCE MIGRANT, THE MARSH WARBLER ACROCEPHALUS-PALUSTRIS, IN SUMMER AND WINTER											131	3	403	414	1989	IBIS
2	Acrocephalus palustris	5	KELSEY, MG								BREEDING BIOLOGY OF MARSH WARBLERS ACROCEPHALUS-PALUSTRIS IN WORCESTERSHIRE - A COMPARISON WITH EUROPEAN POPULATIONS					3						97	6	276	299	2004	British Birds
3	Acrocephalus palustris	2	Wilson, Jeremy D.; Akriotis, Triantaphyllos; Balmer, Dawn E.; Kyrkos, Antonios								Identification of marsh warblers Acrocephalus palustris and reed warblers A. scirpaceus on autumn migration through the eastern Mediterranean.										Published criteria for the separation of Reed Warbler Acrocephalus scirpaceus and Marsh Warbler A palustris in the hand were found to be of limited value in identifying these species in samples captured during autumn migration through the island of Lesvos in the Aegean Sea. This is probably because Reed Warbler morphology varies clinally with birds in eastern Europe (likely to be migrating throug…	20	3	224	232	2001	Ringing & Migration
4	Acrocephalus palustris	0	Barrett, Ken								The status of the marsh warbler in Essex.											1997		159	166	1998	Essex Bird Report
5	Acrocephalus palustris	0	Blair, Michael; Fleming, Sue								A mimic responding to the mimicked species from playback (Acrocephalus palustris versus Sylvia nisoria).											20		95	96	2008	Tichodroma
1	Acrocephalus schoenobaenus	116	CATCHPOL.CK								FUNCTIONS OF ADVERTISING SONG IN SEDGE WARBLER (ACROCEPHALUS-SCHOENOBAENUS) AND REED WARBLER (ACROCEPHALUS-SCIRPACEUS)											133	3	300	305	1991	IBIS
2	Acrocephalus schoenobaenus	113	BAILLIE, SR; PEACH, WJ				Baillie, Stephen/H-3023-2013	Baillie, Stephen/0000-0001-5126-9470			POPULATION LIMITATION IN PALEARCTIC-AFRICAN MIGRANT PASSERINES										We report the results of key factor analyses for Sedge Warbler Acrocephalus schoenobaenus, Blackcap Sylvia atricapilla, Whitethroat Sylvia communis and Willow Warbler Phylloscopus trochilus based on extensive data from the United Kingdom gathered by the British Trust for Ornithology. These results are compared with those from published key factor analyses based on intensive studies of Swallows Hi…	134		120	132	1992	IBIS
3	Acrocephalus schoenobaenus	112	PEACH, W; BAILLIE, S; UNDERHILL, L				Baillie, Stephen/H-3023-2013	Baillie, Stephen/0000-0001-5126-9470			SURVIVAL OF BRITISH SEDGE WARBLERS ACROCEPHALUS-SCHOENOBAENUS IN RELATION TO WEST AFRICAN RAINFALL										Fluctuations in the population levels and annual adult survival rates of British Sedge Warblers Acrocephalus schoenobaenus since the late 1960s are strongly correlated with indices of wet season rainfall in the west African winter quarters. Population changes are unrelated to estimates of breeding productivity in the previous year. Habitat availability in the winter quarters has probably been the…	46	N	300	320	1973	BEHAVIOUR
4	Acrocephalus schoenobaenus	99	Buchanan, KL; Catchpole, CK				Buchanan, Katherine/A-8178-2012				Female choice in the sedge warbler, Acrocephalus schoenobaenus: Multiple cues from song and territory quality										Recent models of animal signalling emphasize the evolution of complex displays containing 'multiple messages'. A variety of potential cues used in female choice were investigated during a three-year field study of the sedge warbler, Acrocephalus schoenobaenus. Twelve possible cues were investigated, and three were found to have a significant influence upon pairing date. Two were different measure…	264	1381	521	526	1997	PROCEEDINGS OF THE ROYAL SOCIETY B-BIOLOGICAL SCIENCES
5	Acrocephalus schoenobaenus	73	Buchanan, KL; Catchpole, CK; Lewis, JW; Lodge, A				Buchanan, Katherine/A-8178-2012				Song as an indicator of parasitism in the sedge warbler					2					We studied female Choice and reproductive success ina marked population of sedge warblers, Acrocephalus schoenobaenus, from 1995 to 1996. Three genera of parasitic blood protozoans, namely Haemoproteus sp., Trypanosoma sp. and Plasmodium sp., were identified from blood samples taken from all breeding adults. Relatively high prevalence values of 19.5% in 1995 and 37.5% in 1996 were associated with…	57		307	314	1999	ANIMAL BEHAVIOUR
6	Acrocephalus schoenobaenus	68	Buchanan, KL; Catchpole, CK				Buchanan, Katherine/A-8178-2012				Song as an indicator of male parental effort in the sedge warbler										Repertoire size has been found to be a sexually selected trait in a number of bird species, although the advantages of mating with a male who possesses a complex song remain unclear. We studied the potential role of song as an indicator of male parental effort in the sedge warbler Acrocephalus schoenobaenus. The male provisioning rate was used as a measure of male parental effort and was found to…	267	1441	321	326	2000	PROCEEDINGS OF THE ROYAL SOCIETY B-BIOLOGICAL SCIENCES
7	Acrocephalus schoenobaenus	57	Marshall, RC; Buchanan, KL; Catchpole, CK				Marshall, Rupert/C-7093-2008; Buchanan, Katherine/A-8178-2012				Sexual selection and individual genetic diversity in a songbird										Here, we report for the first time, to our knowledge, a strong correlation between a measure of individual genetic diversity and song complexity, a sexually selected male trait in sedge warblers, Acrocephalus schoenobaenus. We also find that females prefer to mate with males who will maximize this diversity in individual progeny. The genetic diversity of each offspring is further increased by mea…	270		S248	S250	2003	PROCEEDINGS OF THE ROYAL SOCIETY B-BIOLOGICAL SCIENCES
8	Acrocephalus schoenobaenus	38	CATCHPOLE, CK								TEMPORAL AND SEQUENTIAL ORGANIZATION OF SONG IN SEDGE WARBLER (ACROCEPHALUS-SCHOENOBAENUS)											59		226	246	1976	BEHAVIOUR
9	Acrocephalus schoenobaenus	33	CATCHPOLE, CK								AGGRESSIVE RESPONSES OF MALE SEDGE WARBLERS (ACROCEPHALUS-SCHOENOBAENUS) TO PLAYBACK OF SPECIES SONG AND SYMPATRIC SPECIES SONG, BEFORE AND AFTER PAIRING											25	MAY	489	496	1977	ANIMAL BEHAVIOUR
10	Acrocephalus schoenobaenus	27	BRACKENBURY, JH								COMPARISON OF ORIGIN AND TEMPORAL ARRANGEMENT OF PULSED SOUNDS IN SONGS OF GRASSHOPPER AND SEDGE WARBLERS, LOCUSTELLA-NAEVIA AND ACROCEPHALUS-SCHOENOBAENUS											184	FEB	187	206	1978	JOURNAL OF ZOOLOGY
11	Acrocephalus schoenobaenus	21	Nicholson, Joanne S.; Buchanan, Katherine L.; Marshall, Rupert C.; Catchpole, Clive K.				Marshall, Rupert/C-7093-2008; Buchanan, Katherine/A-8178-2012				Song sharing and repertoire size in the sedge warbler, Acrocephalus schoenobaenus: changes within and between years										The complex song of the male sedge warbler functions mainly in sexual attraction and the evolution of repertoire size is driven primarily by female choice. As male song ceases upon pairing, male-male singing interactions are relatively brief and have not been studied to our knowledge. This study shows that young males in their first breeding season shared significantly more syllables with their n…	74		1585	1592	2007	ANIMAL BEHAVIOUR
12	Acrocephalus schoenobaenus	18	Buchanan, KL; Catchpole, CK				Buchanan, Katherine/A-8178-2012				Extra-pair paternity in the socially monogamous Sedge Warbler Acrocephalus schoenobaenus as revealed by multilocus DNA fingerprinting										A marked population of Sedge Warblers Acrocephalus schoenobaenus was studied from 1993-95, the reproductive success of pairs was monitored and blood samples collected for DNA profiling. Measures of male physical and behavioural traits were also made, including song repertoire size, the amount of time spent singing and song-flighting, as well as territory quality. Although the Sedge Warbler is gen…	142	1	12	20	2000	IBIS
13	Acrocephalus schoenobaenus	13	Bayly, Nicholas J.								Extreme fattening by sedge warblers, Acrocephalus schoenobaenus, is not triggered by food availability alone					3					The strategies adopted by birds during migration are expected to be strongly influenced by resource availability and the efficiency with which these resources are used. The migratory strategy of the sedge warbler in northwest Europe has been linked to superabundances of plum- reed aphids Hyalopterus pruni that enable birds to accumulate extensive fat reserves and make nonstop flights to sub- Saha…	74		471	479	2007	ANIMAL BEHAVIOUR
14	Acrocephalus schoenobaenus	13	Marshall, Rupert C.; Buchanan, Katherine L.; Catchpole, Clive K.				Marshall, Rupert/C-7093-2008; Buchanan, Katherine/A-8178-2012				Song and female choice for extrapair copulations in the sedge warbler, Acrocephalus schoenobaenus					4					Although 90% of passerine birds live in socially monogamous pair bonds, molecular studies have revealed that genetic polygamy occurs in 86% of surveyed passerines, because individuals engage in copulations outside the pair bond (extrapair copulations; EPCs). Most explanations for the occurrence of EPCs involve female gaining indirect benefits from the extrapair male. The sedge warbler is a social…	73		629	635	2007	ANIMAL BEHAVIOUR
15	Acrocephalus schoenobaenus	10	Redfern, Chris P.F.; Topp, Vicky J.; Jones, Phil								Fat and pectoral muscle in migrating sedge warblers Acrocephalus schoenobaenus.										Increases in fat and pectoral muscle mass are important physiological changes associated with migration, but the extent to which these are linked is uncertain. The relationship between fat and pectoral muscle in first-year Sedge Warblers Acrocephalus schoenobaenus was investigated using the carcasses of 20 birds that died by flying into the lighthouse on Bardsey Island, North Wales, UK, in autumn…	22	1	24	34	2004	Ringing & Migration
16	Acrocephalus schoenobaenus	7	Alker, PJ; Redfern, CPF								Double brooding and polygyny in Sedge Warblers Acrocephalus schoenobaenus breeding in north-west England					3					Sedge Warbler breeding was studied at a site in Greater Manchester, UK, during 1991 and 1993. Birds were individually colour-ringed and, in the 2 years of the study, 18 pairs and 38 nesting attempts were observed. In both years, the majority of pairs (> 90%) attempted a second brood after successfully raising their first. Overall nest survival was 44% and the median reproductive output of individ…	27	2	157	163	1996	JOURNAL OF AVIAN BIOLOGY
17	Acrocephalus schoenobaenus	7	THOMAS, DK								ASPECTS OF HABITAT SELECTION IN THE SEDGE WARBLER ACROCEPHALUS-SCHOENOBAENUS											43		356	363	1996	BIRD STUDY
18	Acrocephalus schoenobaenus	6	Cave, Vanessa M.; King, Ruth; Freeman, Stephen N.				Freeman, Stephen/E-7267-2012				An Integrated Population Model From Constant Effort Bird-Ringing Data										Data from annual bird-ringing programs, in which catch effort is standardized, are routinely used to index abundance, productivity, and adult survival. Efficient models have been developed for each. Such monitoring schemes, based on ringing across a number of sites, are perhaps unique in providing this combination of demographic information and make the data particularly amenable to an integrated…	31	NOV	187	194	1984	BIRD STUDY
19	Acrocephalus schoenobaenus	4	Brumm, Henrik; Robertson, Kathryn A.; Nemeth, Erwin								Singing direction as a tool to investigate the function of birdsong: an experiment on sedge warblers										Directional communication, in other words the use of body orientation to increase transmission of directional signals, has been widely neglected in studies of animal communication. Here we propose that the experimental analysis of singing direction in birds can provide insights into the function of song. We studied three populations of sedge warblers, Acrocephalus schoenobaenus, in Austria, Brita…	81	3	653	659	2011	ANIMAL BEHAVIOUR
20	Acrocephalus schoenobaenus	4	Harrison, N.M.; Whitehouse, M.J.; Prince, P.A.; Huin, N.								What problems do local habitat change represent for the Constant Effort Site ringing scheme?										A mist-netting site at Cow Lane Gravel Pits, Cambridgeshire, contributes to the British Trust for Ornithology's (BTO) Constant Effort Site (CES) ringing scheme. Standard net sites are located in relatively stable osier scrub Salix, but the nearby habitat is subject to rapid change which has resulted from the restoration of a gravel pit. This study addresses the question of whether this local habi…	20	1	1	8	2000	Ringing & Migration
21	Acrocephalus schoenobaenus	1	Mason, CF; MacDonald, SM								The bird assemblage of coastal borrowdykes in relation to habitat features										The birds along twenty 500 in lengths of coastal borrowdyke (water-filled ditches left when clay is extracted to make a sea wall) in eastern England were counted in spring 2004 and occurrence related to features of habitat. A total of 45 species was recorded with species richness ranging from 5-21. The most widespread species were little grebe Tachybaptus ruficollis, mute swan Cygnus olor, mallar…	81	2	115	121	2010	OSTRICH
22	Acrocephalus schoenobaenus	0	Bowey, Keith								Sedge warblers nesting in rape crops.											92	7	371	371	1999	British Birds
23	Acrocephalus schoenobaenus	0	Buchanan, K.L.				Buchanan, Katherine/A-8178-2012				Sexy songs: sedge warblers advertise their quality through song complexity.											9	2	23	27	2000	Wildlife Sound
24	Acrocephalus schoenobaenus	0	Eddowes, Mark J.								Correlations between long distance migrants in year-to-year fluctuations of arrival timing.										This study investigated the year-to-year fluctuations in arrival timing in the UK of 23 species of summer migrants. Median arrival dates, estimated from BirdTrack survey data from 2002-10, and Cheshire and Wirral first-arrival dates were analysed using Pearson correlations. Highly statistically significant correlations were found for pairings within a group comprising some warblers and the Pied F…	54	3	293	300	2005	FOLIA ZOOLOGICA
1	Acrocephalus scirpaceus	165	Kilner, RM; Noble, DG; Davies, NB				Kilner, Rebecca/B-2867-2012				Signals of need in parent-offspring communication and their exploitation by the common cuckoo										Nestling birds present vivid gapes and produce loud calls as they solicit food, but the complexity of the display is poorly understood, Here we explain the function of reed warbler begging signals and show how they are exploited by the common cuckoo, Cuculus canorus, a brood parasite. Reed warbler parents integrate visual and vocal signals from their young to adjust their provisioning rates, and …	397	6721	667	672	1999	NATURE
2	Acrocephalus scirpaceus	162	Davies, NB; Brooke, MDL; Kacelnik, A								Recognition errors and probability of parasitism determine whether reed warblers should accept or reject mimetic cuckoo eggs										Reed warblers sometimes make recognition errors when faced with a mimetic cuckoo egg in their nest and reject one or more of their own eggs rather than the foreign egg. Using the framework of signal detection theory, we analyse responses to model eggs to quantify the costs and benefits of acceptance versus rejection in parasitized and unparasitized nests. We show that below a threshold of 19-41% …	263	1372	925	931	1996	PROCEEDINGS OF THE ROYAL SOCIETY B-BIOLOGICAL SCIENCES
3	Acrocephalus scirpaceus	116	CATCHPOL.CK								FUNCTIONS OF ADVERTISING SONG IN SEDGE WARBLER (ACROCEPHALUS-SCHOENOBAENUS) AND REED WARBLER (ACROCEPHALUS-SCIRPACEUS)											46	N	300	320	1973	BEHAVIOUR
4	Acrocephalus scirpaceus	105	Brooke, MD; Davies, NB; Noble, DG								Rapid decline of host defences in response to reduced cuckoo parasitism: behavioural flexibility of reed warblers in a changing world										On Wicken Fen and nearby watercourses in eastern England, parasitism by cuckoos, Cuculus canorus, declined from 26% and 16% of reed warbler (Acrocephalus scirpaceus) nests in 1985 and 1986, respectively, to 2-6% of nests in 1995-97, owing to a decline in cuckoos. Experiments with model eggs showed that over this 12-year period there was a marked decline in host rejection of non-mimetic eggs, from…	265	1403	1277	1282	1998	PROCEEDINGS OF THE ROYAL SOCIETY B-BIOLOGICAL SCIENCES
5	Acrocephalus scirpaceus	94	Davies, NB; Kilner, RM; Noble, DG				Kilner, Rebecca/B-2867-2012				Nestling cuckoos, Cuculus canorus, exploit hosts with begging calls that mimic a brood										Nestling cuckoos, Cuculus canorus, eject host eg gs or young from the nest and are then raised alone by the hosts. Using reed warblers, Acrocephalus scirpaceus, as hosts, we investigated how the single cuckoo chick can command the same provisioning rate as a whole brood of host young. Large size alone is not sufficient to stimulate adequate provisioning because single blackbird, Turdus merula, or…	265	1397	673	678	1998	PROCEEDINGS OF THE ROYAL SOCIETY B-BIOLOGICAL SCIENCES
6	Acrocephalus scirpaceus	67	DAVIES, NB; GREEN, RE								DEVELOPMENT AND ECOLOGICAL SIGNIFICANCE OF FEEDING TECHNIQUES IN REED WARBLER (ACROCEPHALUS-SCIRPACEUS)											24	FEB	213	229	1976	ANIMAL BEHAVIOUR
7	Acrocephalus scirpaceus	56	Lindholm, AK; Thomas, RJ				Thomas, Robert/A-6612-2010; Lindholm, Anna/E-5207-2012	Lindholm, Anna/0000-0001-8460-9769			Differences between populations of reed warblers in defences against brood parasitism					1					Two potential defences against brood parasitism by the cuckoo Cuculus canorus were compared experimentally between British populations of reed warblers Acrocephalus scirpaceus that are parasitised at different rates. (I) Rates of rejection of model cuckoo eggs were lower at two unparasitised populations which did not have resident cuckoos, than at a rarely parasitised population which had cuckoos…	137		25	42	2000	BEHAVIOUR
8	Acrocephalus scirpaceus	47	DUCKWORTH, JW								RESPONSES OF BREEDING REED WARBLERS ACROCEPHALUS-SCIRPACEUS TO MOUNTS OF SPARROWHAWK ACCIPITER-NISUS, CUCKOO CUCULUS-CANORUS AND JAY GARRULUS-GLANDARIUS										Mounts of a Cuckoo Cuculus canorus, a Sparrowhawk Accipiter nisus and a Jay Garrulus glandarius were presented at nests of Reed Warblers Acrocephalus scirpaceus at all breeding stages. Response strength could best be classified according to approach distance (to the mount) and vocalizations used. Warblers reacted much more aggressively to a mount on the nest than to one 3 m adjacent; they approac…	133	1	68	74	1991	IBIS
9	Acrocephalus scirpaceus	40	Welbergen, Justin A.; Davies, Nicholas B.								Strategic Variation in Mobbing as a Front Line of Defense against Brood Parasitism										Coevolutionary arms races, where adaptations in one party select for counter-adaptations in another and vice versa, are fundamental to interactions between organisms and their predators, pathogens, and parasites [1]. Avian brood parasites and their hosts have emerged as model systems for studying such reciprocal coevolutionary processes [2, 3]. For example, hosts have evolved changes in egg appea…	19	3	235	240	2009	CURRENT BIOLOGY
10	Acrocephalus scirpaceus	39	Davies, NB; Madden, JR; Butchart, SHM								Learning fine-tunes a specific response of nestlings to the parental alarm calls of their own species										Parent birds often give alarm calls when a predator approaches their nest. However, it is not clear whether these alarms function to warn nestlings, nor is it known whether nestling responses are species-specific. The parental alarms of reed warblers, Acrocephalus scirpaceus ('churr'), dunnocks, Prunella modularis ('tseep'), and robins, Erithacus rubecula ('seee') are very different. Playback exp…	271	1554	2297	2304	2004	PROCEEDINGS OF THE ROYAL SOCIETY B-BIOLOGICAL SCIENCES
11	Acrocephalus scirpaceus	38	BROOKE, MD; DAVIES, NB								A FAILURE TO DEMONSTRATE HOST IMPRINTING IN THE CUCKOO (CUCULUS-CANORUS) AND ALTERNATIVE HYPOTHESES FOR THE MAINTENANCE OF EGG MIMICRY										The cuckoo Cuculus canorus is divided into various gentes, each laying a distinctive egg and favouring a different species as host. It has long been assumed that the gentes remain distinct because female cuckoos lay the same egg-type as their mother and prefer the same host, developing this preference by imprinting on their foster parents. We tested whether imprinting occurred by laboratory exper…	89	2	154	166	1991	ETHOLOGY
12	Acrocephalus scirpaceus	36	Davies, Nicholas B.; Welbergen, Justin A.								Social Transmission of a Host Defense Against Cuckoo Parasitism										Coevolutionary arms races between brood parasites and hosts involve genetic adaptations and counter-adaptations. However, hosts sometimes acquire defenses too rapidly to reflect genetic change. Our field experiments show that observation of cuckoo (Cuculus canorus) mobbing by neighbors on adjacent territories induced reed warblers (Acrocephalus scirpaceus) to increase the mobbing of cuckoos but n…	324	5932	1318	1320	2009	SCIENCE
13	Acrocephalus scirpaceus	35	BROOKE, MD; DAVIES, NB								PROVISIONING OF NESTLING CUCKOOS CUCULUS-CANORUS BY REED WARBLER ACROCEPHALUS-SCIRPACEUS HOSTS											131	2	250	256	1989	IBIS
14	Acrocephalus scirpaceus	33	CATCHPOL.CK								HABITAT SELECTION AND BREEDING SUCCESS IN REED WARBLER (ACROCEPHALUS-SCIRPACEUS)											43	2	363	&	1974	JOURNAL OF ANIMAL ECOLOGY
15	Acrocephalus scirpaceus	32	Welbergen, J. A.; Davies, N. B.								Reed warblers discriminate cuckoos from sparrowhawks with graded alarm signals that attract mates and neighbours					3					Brood parasites and predators pose unique threats that may favour the evolution of enemy-specific defence strategies. We considered whether reed warblers, Acrocephalus scirpaceus, have a specific alarm call for common cuckoos, Cuculus canorus, and whether their alarms attract mates and neighbours. Mounts of cuckoos ( threat to nest but harmless to adults) were significantly more likely to be mobb…	76		811	822	2008	ANIMAL BEHAVIOUR
16	Acrocephalus scirpaceus	29	Davies, NB; Butchart, SHM; Burke, TA; Chaline, N; Stewart, IRK				Burke, Terry/B-3196-2011; Chaline, Nicolas/J-7276-2012	Chaline, Nicolas/0000-0002-4905-5702			Reed warblers guard against cuckoos and cuckoldry					2					Previous studies have shown that reed warblers, Acrocephalus scirpaceus, are more likely to reject a cuckoo, Cuculus canorus, egg if they have seen a cuckoo, at their nest. This suggests that they would benefit from watching out for cuckoos. We tested whether presentations of a cuckoo mount near the nest (to simulate nest inspection) led to increased nest attendance by the warblers. Cuckoo presen…	65		285	295	2003	ANIMAL BEHAVIOUR
17	Acrocephalus scirpaceus	28	DUCKWORTH, JW								EFFECTS OF MATE REMOVAL ON THE BEHAVIOR AND REPRODUCTIVE SUCCESS OF REED WARBLERS ACROCEPHALUS-SCIRPACEUS										The Reed Warbler Acrocephalus scirpaceus is a largely monogamous insectivorous passerine in which males and females provide equal care by day to eggs and chicks. Polygyny occurs occasionally, with males leaving one female unaided. When females were temporarily removed from three recently-completed clutches their males deserted and resumed the high song levels typical of unmated males. Males may d…	134	2	164	170	1992	IBIS
18	Acrocephalus scirpaceus	28	Lindholm, AK				Lindholm, Anna/E-5207-2012	Lindholm, Anna/0000-0001-8460-9769			Tests of phenotypic plasticity in reed warbler defences against cuckoo parasitism					1					As there is geographic and temporal variation in the rate at which reed warblers Acrocephalus scirpaceus are parasitised by the cuckoo Cuculus canorus, phenotypic plasticity of defences against parasitism could be advantageous. Three experiments were conducted using three populations of reed warblers, parasitised by cuckoos to varying degrees, to test if reed warbler defences against parasitism a…	137		43	60	2000	BEHAVIOUR
19	Acrocephalus scirpaceus	26	Kilner, RM; Davies, NB				Kilner, Rebecca/B-2867-2012				How selfish is a cuckoo chick?					4					We studied the begging display of nestling cuckoos, Cuculus canorus, reared by reed warbler, Acrocephalus scirpaceus, hosts, to test various hypotheses for the cuckoo's unusually rapid begging call. The hypotheses are not mutually exclusive but focus on different parts of the chain: chick need-begging signals-provisioning by hosts. We reject two hypotheses. (1) Cuckoo chicks do not use their exag…	58		797	808	1999	ANIMAL BEHAVIOUR
20	Acrocephalus scirpaceus	25	Stokke, Bard G.; Hafstad, Inge; Rudolfsen, Geir; Bargain, Bruno; Beier, Josef; Campas, David Bigas; Dyrcz, Andrzej; Honza, Marcel; Leisler, Bernd; Pap, Peter L.; Patapavicius, Ricardas; Prochazka, Petr; Schulze-Hagen, Karl; Thomas, Rob; Moksnes, Arne; Moller, Anders Pape; Roskaft, Eivin; Soler, Manuel				Prochazka, Petr/A-9727-2008; Thomas, Robert/A-6612-2010; Honza, Marcel/A-1123-2011	Prochazka, Petr/0000-0001-9385-4547;			Host density predicts presence of cuckoo parasitism in reed warblers										In some hosts of avian brood parasites, several populations apparently escape parasitism, while others are parasitized. Many migratory specialist brood parasites like common cuckoos, Cuculus canorus, experience a short breeding season, and in order to maintain local parasite populations host densities should be sufficiently high to allow efficient nest search. However, no studies have investigate…	116	6	913	922	2007	OIKOS
21	Acrocephalus scirpaceus	24	Butchart, SHM; Kilner, RM; Fuisz, T; Davies, NB				Kilner, Rebecca/B-2867-2012				Differences in the nestling begging calls of hosts and host-races of the common cuckoo, Cuculus canorus					2					We compared nestling begging calls of four hosts (reed warbler,, Acrocephalus scirpaceus; great reed warbler, A. arundinaceus; dunnock, Prunella modularis; and meadow pipit, Anthus pratensis) and the respective host-races of the common cuckoo. Note structure varied between host species, but not between cuckoo host-races, so cuckoos did not vary their call-note structure to match that of their hos…	65		345	354	2003	ANIMAL BEHAVIOUR
22	Acrocephalus scirpaceus	22	Madden, Joah R.; Davies, Nicholas B.								A host-race difference in begging calls of nestling cuckoos Cuculus canorus develops through experience and increases host provisioning										The structure of common cuckoo nestling begging calls differs between the two host-races parasitizing reed warblers (reed warbler-cuckoos) and dunnocks (dunnock-cuckoos; longer syllable duration, lower peak and maximum frequency, narrower bandwidth). Cross-fostering experiments demonstrated that this difference is not genetically fixed but develops through experience. When newly hatched reed warb…	273	1599	2343	2351	2006	PROCEEDINGS OF THE ROYAL SOCIETY B-BIOLOGICAL SCIENCES
23	Acrocephalus scirpaceus	18	Davies, NB; Madden, JR; Butchart, SHM; Rutila, J								A host-race of the cuckoo Cuculus canorus with nestlings attuned to the parental alarm calls of the host species										The common cuckoo has several host-specific races, each with a distinctive egg that tends to match its host's eggs. Here, we show that the host-race specializing on reed warblers also has a host-specific nestling adaptation. In playback experiments, the nestling cuckoos responded specifically to the reed warbler's distinctive 'churr' alarm (given when a predator is near the nest), by reducing beg…	71		173	182	2006	ANIMAL BEHAVIOUR
24	Acrocephalus scirpaceus	16	Bayly, NJ								Optimality in avian migratory fuelling behaviour: a study of a trans-Saharan migrant					1					The fuelling behaviour of long-distance migratory birds is expected to have evolved to minimize a number of potential costs associated with migratory behaviour. Optimality models have generated unique and testable predictions for some of these costs, including time, energy and predation risk. By remotely weighing free-living reed warblers, Acrocephalus scirpaceus, attracted to supplementary food,…	102	2	441	444	2000	CONDOR
25	Acrocephalus scirpaceus	16	Merom, K; Yom-Tov, Y; McClery, R								Philopatry to stopover site and body condition of transient Reed Warblers during autumn migration through Israel										Philopatry to stopover site and changes in body condition of migrating Reed Warblers Acrocephalus scirpaceus were studied in Bet Shean Valley, Israel, where warblers were netted throughout the year. Although the majority of birds were seen only once, the proportion of transients seen twice or more in different years is comparable to the figure for summer residents returning between years, indicat…	273	1587	693	699	2006	PROCEEDINGS OF THE ROYAL SOCIETY B-BIOLOGICAL SCIENCES
26	Acrocephalus scirpaceus	12	Noble, DG; Davies, NB; Hartley, IR; McRae, SB								The red gape of the nestling cuckoo (Cuculus canorus) is not a supernormal stimulus for three common hosts					6					The bright red gape of the nestling common cuckoo Cuculus canorus has often been supposed to act as a supernormal stimulus to elicit provisioning from its foster parents. Parents of three main host species were tested for their response to their own nestlings with artificially reddened gapes. Robins, dunnocks and reed warblers allocated no more food to red-mouthed nestlings than to control nestli…	46		249	255	1999	BIRD STUDY
27	Acrocephalus scirpaceus	9	Harrison, Paula A.; Vanhinsbergh, Des P.; Fuller, Robert J.; Berry, Pam M.								Modelling climate change impacts on the distribution of breeding birds in Britain and Ireland.										Predictions of the availability of suitable climate space for the breeding distributions of eight birds of conservation importance were modelled for the current climate and four climate change scenarios using the SPECIESv2 neural network model. Changes were quantified in relation to six bioclimatic variables and the model was trained on a combination of observed data derived from the European and…	97	6	276	299	2004	British Birds
28	Acrocephalus scirpaceus	6	Howlett, P; Juttner, I; Ormerod, SJ				Ormerod, Steve/A-4326-2010				Migration strategies of sylviid warblers: chance patterns or community dynamics?										The effects of community dynamics in birds on the optimisation of their migratory strategies is a neglected area. For three years, we captured migrating warblers on autumn passage at a coastal site in western Britain. We used canonical correspondence analysis (CCA) to assess spatio-temporal patterns of occurrence, and principal components analysis (PCA) to assess morphological variation. We calcu…	279	1731	1068	1076	2012	PROCEEDINGS OF THE ROYAL SOCIETY B-BIOLOGICAL SCIENCES
29	Acrocephalus scirpaceus	6	Thorogood, Rose; Davies, Nicholas B.								Cuckoos Combat Socially Transmitted Defenses of Reed Warbler Hosts with a Plumage Polymorphism										In predator-prey and host-parasite interactions, an individual's ability to combat an opponent often improves with experience-for example, by learning to identify enemy signals. Although learning occurs through individual experience, individuals can also assess threats from social information. Such recognition could promote the evolution of polymorphisms if socially transmitted defenses depend on…	27	2	126	138	2005	Sandgrouse
30	Acrocephalus scirpaceus	4	Harrison, N.M.; Whitehouse, M.J.; Prince, P.A.; Huin, N.								What problems do local habitat change represent for the Constant Effort Site ringing scheme?										A mist-netting site at Cow Lane Gravel Pits, Cambridgeshire, contributes to the British Trust for Ornithology's (BTO) Constant Effort Site (CES) ringing scheme. Standard net sites are located in relatively stable osier scrub Salix, but the nearby habitat is subject to rapid change which has resulted from the restoration of a gravel pit. This study addresses the question of whether this local habi…	145	2	159	160	2004	JOURNAL OF ORNITHOLOGY
31	Acrocephalus scirpaceus	3	Douglas, David J. T.; Newson, Stuart E.; Leech, David I.; Noble, David G.; Robinson, Robert A.				Robinson, Robert/B-8237-2009	Robinson, Robert/0000-0003-0504-9906			How important are climate-induced changes in host availability for population processes in an obligate brood parasite, the European cuckoo?										In recent years, populations of long-distance migrant birds have declined markedly. Resource availability, both on breeding and wintering grounds, is likely to be important particularly since changing climates are affecting the timing and synchrony of such resources. We use novel analytical methods to examine whether large-scale population declines in the brood-parasite common cuckoo Cuculus cano…	23	2	65	79	2006	Ringing & Migration
32	Acrocephalus scirpaceus	3	Welbergen, Justin A.; Davies, Nicholas B.								Direct and indirect assessment of parasitism risk by a cuckoo host										When the risk of encountering enemies varies in space or in time, this may select for plasticity of costly defenses. Hosts are known to vary both mobbing of adult cuckoos and egg rejection with spatiotemporal variation in brood parasitism, but it is unclear what parasitism cues they use to guide their defense plasticity. There is evidence that hosts use cuckoo activity near their nests as a direc…	119	11	1834	1840	2010	OIKOS
33	Acrocephalus scirpaceus	1	Harrison, M. D.; Broom, M.								A game-theoretic model of interspecific brood parasitism with sequential decisions										The interaction between hosts and parasites in bird populations has been studied extensively. This paper uses game-theoretic methods to model this interaction. This has been done in previous papers but has not been studied taking into account the detailed sequential nature of this game. We introduce a model allowing the host and parasite to make a number of decisions which will depend on various …	25	1	27	41	2010	Ringing & Migration
34	Acrocephalus scirpaceus	1	Kilner, RM; Noble, DG; Davies, NB				Kilner, Rebecca/B-2867-2012				How should cuckoo chicks signal in different host nests?											54	3	293	300	2005	FOLIA ZOOLOGICA
35	Acrocephalus scirpaceus	1	Mason, CF; MacDonald, SM								The bird assemblage of coastal borrowdykes in relation to habitat features										The birds along twenty 500 in lengths of coastal borrowdyke (water-filled ditches left when clay is extracted to make a sea wall) in eastern England were counted in spring 2004 and occurrence related to features of habitat. A total of 45 species was recorded with species richness ranging from 5-21. The most widespread species were little grebe Tachybaptus ruficollis, mute swan Cygnus olor, mallar…	31	2	182	188	2009	Sandgrouse
36	Acrocephalus scirpaceus	1	Thorogood, Rose; Davies, Nicholas B.								Hawk mimicry and the evolution of polymorphic cuckoos.										The resemblance of some parasitic cuckoos to Accipiter hawks has been known since ancient times. Recent experiments show that the hawk-like features of Common Cuckoos (Cuculus canorus) facilitate access to Reed Warbler (Acrocephalus scirpaceus) host nests. However, social information alerts hosts to see through the cuckoo's mimetic disguise. In turn, this has promoted the evolution of a cuckoo po…	26	1	48	55	2011	Ringing & Migration
37	Acrocephalus scirpaceus	0	Bruce, Ken								Reed warblers breeding in south west Scotland.											19	2	119	120	1997	Scottish Birds
38	Acrocephalus scirpaceus	0	Calvert, Malcolm; Cook, Katrina								Abnormal reed warbler chicks.											98	8	433	433	2005	British Birds
39	Acrocephalus scirpaceus	0	Davies, Nick								Driving parents cuckoo.											9	5	40	42	2002	Wildlife Sound
40	Acrocephalus scirpaceus	0	de L. Brooke, M.; Davies, N.B.; Noble, D.G.								Rapid decline of host defences in response to reduced cuckoo parasitism: behavioural flexibility of reed warblers in a changing world.										On Wicken Fen and nearby watercourses in eastern England, parasitism by cuckoos, Cuculus canorus, declined from 26% and 16% of reed warbler (Acrocephalus scirpaceus) nests in 1983 and 1986, respectively, to 2-6% of nests in 1995-97, owing to a decline in cuckoos. Experiments with model eggs showed that over this 12-year period there was a marked decline in host rejection of non-mimetic eggs, from…	265	1403	1277	1282	1998	Proceedings of the Royal Society of London Series B Biological Sciences
41	Acrocephalus scirpaceus	0	Dennis, Mike								Reed warblers sunning.											89	7	318	318	1996	British Birds
42	Acrocephalus scirpaceus	0	Eddowes, Mark J.								Correlations between long distance migrants in year-to-year fluctuations of arrival timing.										This study investigated the year-to-year fluctuations in arrival timing in the UK of 23 species of summer migrants. Median arrival dates, estimated from BirdTrack survey data from 2002-10, and Cheshire and Wirral first-arrival dates were analysed using Pearson correlations. Highly statistically significant correlations were found for pairings within a group comprising some warblers and the Pied F…	14	8	322	322	1999	TRENDS IN ECOLOGY & EVOLUTION
43	Acrocephalus scirpaceus	0	Harrison, Nancy; Whitehouse, Mick								Drivers of songbird productivity at a restored gravel pit: Influence of seasonal flooding and rainfall patterns and implications for habitat management										The restoration of riparian sites following aggregate extraction frequently aims to expand the wetland habitat, and enhance the wetland wildlife community. However, aggregate extraction sites, typically on river flood plains, are subject to unpredictable flooding along with climate variability and other factors beyond the control of local management that may be equally important in determining th…	162		138	143	2012	AGRICULTURE ECOSYSTEMS & ENVIRONMENT
44	Acrocephalus scirpaceus	0	Kilner, Rebecca M.	Espmark, Yngve; Amundsen, Trond; Rosenqvist, Gunilla							Multiple nestling begging signals: reed warbler chicks and cuckoo tricks.													353	364	2000	Animal signals: signalling and signal design in animal communication.
45	Acrocephalus scirpaceus	0	Lindholm, Anna K.								Tests of phenotypic plasticity in reed warbler defences against cuckoo parasitism.											137	1	42	60	2000	Behaviour
46	Acrocephalus scirpaceus	0	Radford, A.P.								Reed warbler apparently using willow-bark pieces in nest construction.											100	6	383	383	2007	British Birds
47	Acrocephalus scirpaceus	0	Robertson, D.								Eurasian reed warblers in Scotland: a review of probable breeding records.											24	1	36	39	2003	Scottish Birds
48	Acrocephalus scirpaceus	0	Voiter, Stephen C.; Riddington, Roger								Tail pattern of reed warblers.											98	2	99	100	2005	British Birds
49	Acrocephalus scirpaceus	0	Warden, D.								Two reed warblers laying in same nest.											91	8	329	329	1998	British Birds
50	Acrocephalus scirpaceus	0	Warden, David								Reed warblers reusing nests.											96	6	303	303	2003	British Birds
51	Acrocephalus scirpaceus	0	Westwood, N.J.								Reed warblers reusing nests.											98	2	101	101	2005	British Birds
1	Actitis hypoleucos	25	Buckton, ST; Ormerod, SJ				Ormerod, Steve/A-4326-2010				Use of a new standardized habitat survey for assessing the habitat preferences and distribution of upland river birds					3					Assessments of the habitat requirements of river birds are central to understanding their distribution and abundance. Here, we make an initial appraisal of the suitability for this purpose of a new standardized method of river habitat survey (RHS) developed by the Environment Agency (EA). We carried out RHS and recorded the presence of five common birds along 74 upland Welsh streams. RHS provided…	29	JUL	99	110	1982	BIRD STUDY
2	Actitis hypoleucos	23	HOLLAND, PK; YALDEN, DW								POPULATION-DYNAMICS OF COMMON SANDPIPERS ACTITIS-HYPOLEUCOS BREEDING ALONG AN UPLAND RIVER SYSTEM					3					The survival rate of a colour-ringed Common Sandpiper population followed from 1977 to 1989 averaged 0.79 per year, but fluctuated in response to April weather. Late April snowstorms in 1981 and 1989 reduced the apparent survival rates, from the previous years, to 0.39 and 0.50, respectively, and the breeding populations fell from 21 to 14 and from 20 to 12 pairs. Recovery from the reduced popula…	44		327	337	1997	BIRD STUDY
3	Actitis hypoleucos	21	HOLLAND, PK; ROBSON, JE; YALDEN, DW								THE BREEDING BIOLOGY OF THE COMMON SANDPIPER ACTITIS-HYPOLEUCOS IN THE PEAK DISTRICT											61	1	41	49	1992	BIOLOGICAL CONSERVATION
4	Actitis hypoleucos	20	YALDEN, DW								THE INFLUENCE OF RECREATIONAL DISTURBANCE ON COMMON SANDPIPERS ACTITIS-HYPOLEUCOS BREEDING BY AN UPLAND RESERVOIR, IN ENGLAND										Common sandpipers Actitis hypoleucos breading around the Ladybower Reservoir in the Peak District National Park, England, are disturbed by anglers and other visitors, so that they take flight about 29% more than they would if undisturbed; they frequently are forced to encroach on their neighbours' territories. causing far more fighting than done by nearby riverine birds. They take flight from an …	38		151	159	1991	BIRD STUDY
5	Actitis hypoleucos	19	VICKERY, J								BREEDING DENSITY OF DIPPERS CINCLUS-CINCLUS GRAY WAGTAILS MOTACILLA-CINEREA AND COMMON SANDPIPERS ACTITIS-HYPOLEUCOS IN RELATION TO THE ACIDITY OF STREAMS IN SOUTH-WEST SCOTLAND										The distribution of breeding pairs of Dippers Cinclus cinclus, Grey Wagtails Motacilla cinerea and Common Sandpipers Actitis hypoleucos was assessed along 18 streams in south-west Scotland during summer 1987, and the lengths of territories, occupied by 55 breeding pairs of Dippers, were measured. In each stream the water chemistry, physical structure (e.g. gradient, altitude, nature of bankside v…	133	2	178	185	1991	IBIS
6	Actitis hypoleucos	13	THOMPSON, PS; THOMPSON, DBA								GREENSHANKS TRINGA-NEBULARIA AND LONG-TERM STUDIES OF BREEDING WADERS										Despite great variation in breeding, social and migration systems, there have been few long-term (more than 5 years) studies of waders. This paper describes a 27-year study of breeding Greenshanks Tringa nebularia, and briefly reviews the scope for long-term work on breeding waders in the Western Palaearctic.Between 1964 and 1990 a Greenshank population in NW Scotland varied threefold in number b…	133		99	112	1991	IBIS
7	Actitis hypoleucos	13	YALDEN, DW								DIET, FOOD AVAILABILITY AND HABITAT SELECTION OF BREEDING COMMON SANDPIPERS ACTITIS-HYPOLEUCOS											128	1	23	36	1986	IBIS
8	Actitis hypoleucos	13	YALDEN, DW								THE HABITAT AND ACTIVITY OF COMMON SANDPIPERS ACTITIS-HYPOLEUCOS BREEDING BY UPLAND RIVERS					3						33		214	222	1986	BIRD STUDY
9	Actitis hypoleucos	11	Mee, A; Whitfield, DP; Thompson, DBA; Burke, T								Extrapair paternity in the common sandpiper, Actitis hypoleucos, revealed by DNA fingerprinting					2					The prevalence of extrapair paternity in many socially monogamous passerines has not been mirrored in most monogamous nonpasserines studied to date. Here, we investigated the reproductive behaviour of a socially monogamous shorebird, the common sandpiper, using multilocus DNA fingerprinting. Given the high level of paternal care in the species, and the likely high costs in allocating care between…	159	3	649	659	2009	OECOLOGIA
10	Actitis hypoleucos	10	Pearce-Higgins, J. W.; Yalden, D. W.; Dougall, T. W.; Beale, C. M.								Does climate change explain the decline of a trans-Saharan Afro-Palaearctic migrant?										There is an urgent need to understand how climate change will impact on demographic parameters of vulnerable species. Migrants are regarded as particularly vulnerable to climate change; phenological mismatch has resulted in the local decline of one passerine, whilst variations in the survival of others have been related to African weather conditions. However, there have been few demographic studi…	67		333	342	2004	ANIMAL BEHAVIOUR
11	Actitis hypoleucos	9	Brewin, PA; Buckton, ST; Ormerod, SJ				Ormerod, Steve/A-4326-2010				River habitat surveys and biodiversity in acid-sensitive rivers										1. The distribution of aquatic invertebrates (102 sites) and river birds (74 sites) was assessed along acid-sensitive streams in upland Wales. River Habitat Surveys (RHS) and measurements of pH at the same sites were then used to ask the questions: (i) do RHS measures indicate habitat requirements for individual species? (ii) do RHS measures reflect patterns in community composition? (iii) are th…	8	4	501	514	1998	AQUATIC CONSERVATION-MARINE AND FRESHWATER ECOSYSTEMS
12	Actitis hypoleucos	5	Dougall, TW; Holland, PK; Mee, A; Yalden, DW								Comparative population dynamics of Common Sandpipers Actitis hypoleucos: living at the edge					1					Capsule Common Sandpiper populations at the edge of their range do not recruit so well.Aims To compare the survival rates, breeding success and recruitment of a population near the edge of its range (Peak District) with one more centrally placed (Borders).Methods Populations were censused weekly; adults and chicks were ringed, and apparent survival of adults determined by resighting colour-ringed…	52		80	87	2005	BIRD STUDY
13	Actitis hypoleucos	3	HOLLAND, PK; YALDEN, DW								AN ESTIMATE OF LIFETIME REPRODUCTIVE SUCCESS FOR THE COMMON SANDPIPER ACTITIS-HYPOLEUCOS					2					Field evidence, interpreted conservatively, suggests that female Common Sandpipers reared only 1.46 fledglings in their lifetimes. Fledgling output was positively correlated with longevity, and improved over the first 3 years. Over half the fledglings were produced by just 14% of the females. Calculating the likely errors in our interpretation of the field data suggests that the true production m…	41		110	119	1994	BIRD STUDY
14	Actitis hypoleucos	3	Holland, PK; Yalden, DW								Population dynamics of Common Sandpipers Actitis hypoleucos in the Peak District of Derbyshire - a different decade					2					Capsule A report of the failure of a population to recover from a catastrophic snow storm.Aims To examine why our study population of Common Sandpipers failed to recover from a sharp drop in 1989, caused by a severe late April snowstorm, when it had recovered from a similar event in 1981.Methods Populations were censused weekly, with extra visits to ring adults and chicks. Hatching was assumed to…	49		131	138	2002	BIRD STUDY
15	Actitis hypoleucos	2	Dougall, Tom W.; Mee, Allan; Yalden, Derek W.								Recent fluctuations in a common sandpiper breeding population.											116	2	83	85	2009	Wader Study Group Bulletin
16	Actitis hypoleucos	1	Yalden, D.W.								A century of wader studies? Not quite, but it should be!											105		42	49	2004	Wader Study Group Bulletin
17	Actitis hypoleucos	1	Yalden, D.W.; Dougall, T.W.								Production, survival and catchability of chicks of common sandpipers Actitis hypoleucos.										Previous estimates of Common Sandpiper chick survival confound the different ages at ringing with subsequent survival. Most chicks in our Peak District study site, the source of previous estimates, are ringed at 3-5 days old, but elsewhere, and previously in the Peak District, many chicks were ringed in the nest. Survival rates of newly hatched Common Sandpiper chicks are 0.77 on their first day,…	103	2	100	114	2010	British Birds
18	Actitis hypoleucos	0	Barron, Pete								Breeding survey of common sandpiper at Bassenthwaite Lake 1995.											1995		72	73	1996	Birds and Wildlife in Cumbria
19	Actitis hypoleucos	0	Bates, Brian; Etheridge, Brian; Elkins, Norman; Fox, James; Summers, Ron W.								Pre-migratory change in mass and the migration track of a Common Sandpiper Actitis hypoleucos from Scotland.										In Britain, Common Sandpipers Actitis hypoleucos mainly prepare for southward migration at coastal sites. On the Moray Firth, NE Scotland, they increased in mass at an average rate of 0.95 g (SE = 0.20) per day during late June to early August. However, there was no overall increase with date of the mean mass in the local population. A higher proportion of adults than juveniles were caught in Jun…	119	3	149	154	2012	Wader Study Group Bulletin
20	Actitis hypoleucos	0	Dougall, T.W.; Holland, P.K.; Yalden, D.W.								A revised estimate of the breeding population of common sandpipers Actitis hypoleucos in Great Britain and Ireland.										Breeding densities of Common Sandpipers in Great Britain (there are no density estimates for Ireland) are summarised, along with surveys of their national and local distribution, to produce new estimates of the total national populations. Extrapolating from linear densities to the populations of areas is problematical and a range of population estimates from 11,500 to 51,500 can be justified. Rea…	119	2	84	88	2012	Wader Study Group Bulletin
21	Actitis hypoleucos	0	Dougall, T.W.; Holland, P.K.; Yalden, D.W.								The population biology of common sandpipers in Britain.										The population biology of Common Sandpipers Actitis hypoleucos has been studied, especially by colour-ringing breeding adults, at two sites, in the Peak District and in the Scottish Borders. Adults are usually site-faithful, males more so than females, contributing to a good apparent survival rate (72% and 67%, respectively). Some, at least, return to breed at one year old, but usually not to the…	104		82	84	2004	Wader Study Group Bulletin
22	Actitis hypoleucos	0	Dougall, Tom								Common sandpipers also dive to escape danger: in Scotland.											97		51	52	2002	Wader Study Group Bulletin
23	Actitis hypoleucos	0	Holland, P.K.; Yalden, D.W.								Common sandpipers in the River Ashop-Alport Valley system.											5		60	62	1999	Magpie
24	Actitis hypoleucos	0	Holland, P.K.; Yalden, D.W.								Observations on desertion and recruitment in a population of breeding Common Sandpipers Actitis hypoleucos at the edge of their range.										More than thirty years of watching colour-ringed Common Sandpipers leads us to consider what attracts a recruit to join a population or a previous member to desert it. Experienced males reclaim their breeding territory when they return and experienced females join them almost immediately. New males arrive later, and we suggest that they judge the area by the behaviour of the birds already present…	119	3	172	177	2012	Wader Study Group Bulletin
25	Actitis hypoleucos	0	Holland, Philip K.								Relationship between common sandpipers Actitis hypoleucos breeding along the River Lune, England, and those fattening for migration near its mouth with a model of their onward migration.											20	1	44	45	1999	Scottish Birds
26	Actitis hypoleucos	0	Mearns, Richard; Mearns, Barbara								Unusually large roost of common sandpipers on the Solway.											25		53	53	2005	Scottish Birds
27	Actitis hypoleucos	0	Norman, David								Common sandpiper Actitis hypoleucos attempting to evade capture by swimming underwater.											98		48	48	2002	Wader Study Group Bulletin
28	Actitis hypoleucos	0	Yalden, D.W.								Common sandpipers also dive to escape danger: in England.											97		52	52	2002	Wader Study Group Bulletin
1	Aegithalos caudatus	145	HINSLEY, SA; BELLAMY, PE; NEWTON, I; SPARKS, TH				Hinsley, Shelley/E-6790-2012				HABITAT AND LANDSCAPE FACTORS INFLUENCING THE PRESENCE OF INDIVIDUAL BREEDING BIRD SPECIES IN WOODLAND FRAGMENTS										Bird species distributions in 151 woods (0.02-30 ha) in a lowland arable landscape in eastern England were investigated using logistic regression analysis. Of 31 species included in the study, only Marsh Tit Parus palustris, Nightingale Luscinia mega-rhynchos and Chiffchaff Phylloscopus collybita failed to breed in woods of <0.5 ha. For many woodland species, the probability of breeding was posit…	26	2	94	104	1995	JOURNAL OF AVIAN BIOLOGY
2	Aegithalos caudatus	113	Hatchwell, BJ								Investment strategies of breeders in avian cooperative breeding systems										An individual's optimal investment in young depends partly on the number of individuals caring for the same brood. In cooperative breeders, the investment strategy of parents with helpers is variable. When parents maintain the same effort regardless of helper number, helper care is additive. When parents fully compensate for the care of helpers by decreasing their own effort, total care does not …	154	2	205	219	1999	AMERICAN NATURALIST
3	Aegithalos caudatus	91	Russell, AF; Hatchwell, BJ								Experimental evidence for kin-biased helping in a cooperatively breeding vertebrate										The widespread belief that kin selection is necessary for the evolution of cooperative breeding in vertebrates has recently been questioned. These doubts have primarily arisen because of the paucity of unequivocal evidence for kin preferences in cooperative behaviour. Using the cooperative breeding system of long-tailed tits (Aegithalos caudatus) in which kin and non-kin breed within each social …	268	1481	2169	2174	2001	PROCEEDINGS OF THE ROYAL SOCIETY B-BIOLOGICAL SCIENCES
4	Aegithalos caudatus	77	Sharp, SP; McGowan, A; Wood, MJ; Hatchwell, BJ				Wood, Matthew/B-6124-2011				Learned kin recognition cues in a social bird										In many cooperatively breeding birds, kin selection has an important role in the evolution and maintenance of social behaviour, and 'helpers' can maximize indirect fitness gains by preferentially allocating care to close relatives(1-3). Although there is evidence for kin-biased helping behaviour in several species(1,4,5), the mechanism of kin recognition underlying this behaviour is poorly unders…	434	7037	1127	1130	2005	NATURE
5	Aegithalos caudatus	60	MacColl, ADC; Hatchwell, BJ								Heritability of parental effort in a passerine bird										The study of the evolution of parental care is central to our understanding of social systems, sexual selection, and interindividual conflict, yet we know virtually nothing about the genetic architecture of parental care traits in natural populations. In this paper, we use data from a long term field study of a passerine bird, the long-tailed tit (Aegithalos caudatus), to examine the heritability…	105	1	100	106	1996	OECOLOGIA
6	Aegithalos caudatus	59	Hinsley, SA; Bellamy, PE; Newton, I; Sparks, TH				Hinsley, Shelley/E-6790-2012				Influences of population size and woodland area on bird species distributions in small woods										Distributions of individual bird species in 151 small woods (size range 0.02-30 ha) were investigated in 3 consecutive years during which the abundance of certain species varied markedly. Relationships between the probabilities of certain bird species breeding and woodland area were described using incidence functions derived from logistic regression analysis. In general, for species which were l…	57	9	2191	2195	2003	EVOLUTION
7	Aegithalos caudatus	56	Hatchwell, BJ; Russell, AF								Provisioning rules in cooperatively breeding long-tailed tits Aegithalos caudatus: An experimental study										In a population of long-tailed tits Aegithalos caudatus all birds attempted to breed monogamously, but some helped to provision the nestlings of another pair if their own breeding attempt failed. An individual's investment rules will determine the fitness consequences of helping for breeders and helpers, and the aim of this study was to examine how individual investment varied with the number of …	263	1366	83	88	1996	PROCEEDINGS OF THE ROYAL SOCIETY B-BIOLOGICAL SCIENCES
8	Aegithalos caudatus	51	Hatchwell, BJ; Russell, AF; MacColl, ADC; Ross, DJ; Fowlie, MK; McGowan, A								Helpers increase long-term but not short-term productivity in cooperatively breeding long-tailed tits										Helpers at the nest in the cooperative breeding system of long-tailed tits Aegithalos caudatus exhibit kin preference in their helping behavior. The aim of this study was to use multivariate analyses to investigate whether helpers accrue indirect fitness benefits through their cooperation by increasing the productivity of relatives. All birds started each season breeding independently in pairs, b…	15	1	1	10	2004	BEHAVIORAL ECOLOGY
9	Aegithalos caudatus	43	Hatchwell, BJ; Ross, DJ; Fowlie, MK; McGowan, A								Kin discrimination in cooperatively breeding long-tailed tits										Long-tailed tits Aegithalos caudatus are cooperative breeders ih which helpers exhibit a kin preference in their cooperative behaviour. We investigated the mechanism through which this preference is achieved by first conducting an experiment for testing whether breeders could recognize the calls of their relatives while controlling for spatial effects. We found that there were significant differe…	268	1470	885	890	2001	PROCEEDINGS OF THE ROYAL SOCIETY B-BIOLOGICAL SCIENCES
10	Aegithalos caudatus	40	Hatchwell, BJ; Russell, AF; Fowlie, MK; Ross, DJ								Reproductive success and nest-site selection in a cooperative breeder: Effect of experience and a direct benefit of helping										We determined whether nest-site characteristics influence reproductive success and whether experience influences nest-site selection in a population of cooperatively breeding Long-tailed Tits (Aegithalos caudatus). Nest predation was high; only 17% of breeding attempts resulted in fledged young. The height of nests was an important determinant of success; low nests were significantly more success…	116	2	355	363	1999	AUK
11	Aegithalos caudatus	35	MacColl, ADC; Hatchwell, BJ								Sharing of caring: nestling provisioning behaviour of long-tailed tit, Aegithalos caudatus, parents and helpers					5					The optimal investment strategies of parents in biparental systems are well studied. This contrasts with a poor theoretical and empirical understanding of variation in individual investment in breeding systems with multiple carers. We used the cooperative breeding system of long-tailed tits, to investigate how parents and helpers adjust their rate of nestling provisioning in relation to measures …	73	6	1137	1148	2004	JOURNAL OF ANIMAL ECOLOGY
12	Aegithalos caudatus	34	Maccoll, ADC; Hatchwell, BJ								Determinants of lifetime fitness in a cooperative breeder, the long-tailed tit Aegithalos caudatus										1. Long-tailed tits (Aegithalos caudatus) are a cooperatively breeding species in which helpers often invest effort in the provisioning of young that are not their own.2. We quantified the lifetime reproductive success (LRS) and the individual fitness, lambda, of 228 long-tailed tits using 8 years of field data. Calculation of lambda took account of the effect of helpers on reproductive success, …	66		955	964	2003	ANIMAL BEHAVIOUR
13	Aegithalos caudatus	30	Hatchwell, BJ; Ross, DJ; Chaline, N; Fowlie, MK; Burke, T				Burke, Terry/B-3196-2011; Chaline, Nicolas/J-7276-2012	Chaline, Nicolas/0000-0002-4905-5702			Parentage in the cooperative breeding system of long-tailed tits, Aegithalos caudatus					1					In cooperatively breeding birds multiple maternity and paternity of broods is not uncommon, reproduction often being shared among group members as well as with extragroup members. We investigated the extent of extrapair paternity and intraspecific brood parasitism in a population of cooperatively breeding long-tailed tits. Our aim was to determine the frequency and cause of mixed parentage and to…	64		55	63	2002	ANIMAL BEHAVIOUR
14	Aegithalos caudatus	28	MacColl, ADC; Hatchwell, BJ								Temporal variation in fitness payoffs promotes cooperative breeding in long-tailed tits Aegithalos caudatus										Cooperative breeding is paradoxical because some individuals forego independent reproduction and instead help others to reproduce. The ecological constraints model states that such behavior arises because of constraints on independent reproduction. Spatial variation in constraints has been shown to co-vary with the incidence of cooperative breeding in correlational and experimental studies. Here,…	117	9	1371	1379	2008	OIKOS
15	Aegithalos caudatus	28	McGowan, A; Sharp, SP; Hatchwell, BJ								The structure and function of nests of Long-Tailed Tits Aegithalos caudatus										1. The aim of this study was to investigate the structure and thermoregulatory function of nests of the Long-Tailed Tit, Aegithalos caudatus.2. The feather lining of Long-Tailed Tit nests represents a major portion (41%) of the total nest mass.3. The mass of feathers varied among nests and declined through the breeding season, but there was no seasonal loss of nest insulation quality because of i…	77	1	92	102	2008	JOURNAL OF ANIMAL ECOLOGY
16	Aegithalos caudatus	27	Sharp, Stuart P.; Baker, Mitchell B.; Hadfield, Jarrod D.; Simeoni, Michelle; Hatchwell, Ben J.								Natal dispersal and recruitment in a cooperatively breeding bird										Dispersal is a fundamental but poorly understood process in ecology, evolution and conservation. Natal dispersal patterns are a major determinant of population kin structure and thus may play a key role in social evolution. We studied natal dispersal in the cooperatively breeding long-tailed tit Aegithalos caudatus, a non-territorial species that does not exhibit delayed dispersal. We investigate…	70	5	820	830	2001	JOURNAL OF ANIMAL ECOLOGY
17	Aegithalos caudatus	26	Hatchwell, BJ; Anderson, C; Ross, DJ; Fowlie, MK; Blackwell, PG								Social organization of cooperatively breeding long-tailed tits: kinship and spatial dynamics										1. Long-tailed tits Aegithalos caudatus L. are cooperative breeders in which breeders that have failed in their own breeding attempt become helpers at the nest of relatives. We investigated the effects of kinship on the spatial dynamics of non-breeding flocks of long-tailed tits in order to determine the information available on the kinship of other members of the population from their use of hom…	18	4	578	583	2004	FUNCTIONAL ECOLOGY
18	Aegithalos caudatus	25	Hatchwell, BJ; Russell, AF; Ross, DJ; Fowlie, MK								Divorce in cooperatively breeding long-tailed tits: a consequence of inbreeding avoidance?										The decision of whether to divorce a breeding partner between reproductive attempts can significantly affect individual fitness. In this paper, we report that 63% of surviving pairs of long-tailed tits Aegithalos caudatus divorced between years. We examine three likely explanations for the high divorce rate in this cooperative breeder. The 'better option' hypothesis predicts that divorce and re-p…	267	1445	813	819	2000	PROCEEDINGS OF THE ROYAL SOCIETY B-BIOLOGICAL SCIENCES
19	Aegithalos caudatus	25	McGowan, A; Hatchwell, BJ; Woodburn, RJW								The effect of helping behaviour on the survival of juvenile and adult long-tailed tits Aegithalos caudatus										1. In the cooperative breeding system of the long-tailed tit Aegithalos caudatus failed breeders may become helpers at the nest of another pair to whom they are usually related. The aim of this study was to determine the effect of helping behaviour on the survival of helpers and the recipients of their help.2. We used capture-mark-recapture data and the MARK program to analyse survival of 482 bir…	72	3	491	499	2003	JOURNAL OF ANIMAL ECOLOGY
20	Aegithalos caudatus	25	Sharp, Stuart P.; Simeoni, Michelle; Hatchwell, Ben J.								Dispersal of sibling coalitions promotes helping among immigrants in a cooperatively breeding bird										Kin selection is a major force in social evolution, but dispersal is often assumed to reduce its impact by diluting kinship. In most cooperatively breeding vertebrates, in which more than two individuals care for young, juveniles delay dispersal and become helpers in family groups. In long-tailed tits (Aegithalos caudatus), however, offspring disperse to breed and helpers are failed breeders that…	275	1647	2125	2130	2008	PROCEEDINGS OF THE ROYAL SOCIETY B-BIOLOGICAL SCIENCES
21	Aegithalos caudatus	23	Russell, AF								Dispersal costs set the scene for helping in an atypical avian cooperative breeder										The ecological constraints hypothesis is suggested to explain the evolution of cooperative breeding in birds. This hypothesis predicts that the scene for cooperative breeding is set when ecological factors constrain offspring from dispersal. This prediction was tested in the atypical cooperative breeding system of the long-tailed tit, Aegithalos caudatus, by comparing the degree of philopatry and…	268	1462	95	99	2001	PROCEEDINGS OF THE ROYAL SOCIETY B-BIOLOGICAL SCIENCES
22	Aegithalos caudatus	20	Bellamy, PE; Rothery, P; Hinsley, SA				Hinsley, Shelley/E-6790-2012				Synchrony of woodland bird populations: the effect of landscape structure										The influence of environmental stochasticity and dispersal in producing patterns in population synchrony was examined for 53 woods censused annually from 1990 to 1999 for nine resident bird species (wren Troglodytes troglodytes, dunnock Prunella modularis, robin Erithacus rubecula, blackbird Turdus merula, song thrush Turdus philomelos, long-tailed tit Aegithalos caudatus, blue tit Parus caeruleu…	26	3	338	348	2003	ECOGRAPHY
23	Aegithalos caudatus	18	Hatchwell, Ben J.; Sharp, Stuart P.						Brockmann, HJ; Slater, PJB; Snowdon, CT; Roper, TJ; Naguib, M; WynneEdwards, KE		Kin selection, constraints, and the evolution of cooperative breeding in long-tailed tits								Advances in the Study of Behavior			36		355	395	2006	ADVANCES IN THE STUDY OF BEHAVIOR, VOL 36
24	Aegithalos caudatus	17	Bellamy, PE; Rothery, P; Hinsley, SA; Newton, I				Hinsley, Shelley/E-6790-2012				Variation in the relationship between numbers of breeding pairs and woodland area for passerines in fragmented habitat										Species may differ in the relationship between the numbers of breeding pairs present and woodland area, because the proportion of a wood that forms suitable habitat will vary with woodland size. In this paper, we examine the pattern of variation in abundance with woodland area for eight breeding bird species, and also show how this pattern varied between years. During 1990-1997, we made annual ce…	23	1	130	138	2000	ECOGRAPHY
25	Aegithalos caudatus	14	Hatchwell, BJ; Fowlie, MK; Ross, DJ; Russell, AF								Incubation behavior of Long-tailed Tits: Why do males provision incubating females?										The incubation period of Long-tailed Tits Aegithalos caudatus is highly variable, ranging from 14 to 21 days. Females alone incubate the eggs, but males provide females with some food during the incubation period, although females must also forage for themselves. Our aim was to investigate whether male provisioning of incubating females influenced female incubation behavior and the length of the …	101	3	681	686	1999	CONDOR
26	Aegithalos caudatus	14	McGowan, Andrew; Sharp, Stuart P.; Simeoni, Michelle; Hatchwell, Ben J.								Competing for position in the communal roosts of long-tailed tits					5					Communal roosting is widespread among social animals and has several hypothesized functions, including reduction of predation risk and thermoregulatory costs, and information sharing. The benefit derived from roosting in close proximity to conspecifics is likely to depend on an individual's position within the roost, but there have been few quantitative studies of the process of communal roost fo…	72		1035	1043	2006	ANIMAL BEHAVIOUR
27	Aegithalos caudatus	14	Sharp, SP; Hatchwell, BJ								Individuality in the contact calls of cooperatively breeding long-tailed tits (Aegithalos caudatus)					41316					The ability to discriminate between individuals or groups of individuals is important for the evolution of sociality. Individual vocal recognition is thought to be widespread in social birds, yet few studies have investigated its role in cooperatively breeding species. In long-tailed tits, helpers preferentially provide care to close kin, and individuals are able to discriminate between the vocal…	142		1559	1575	2005	BEHAVIOUR
28	Aegithalos caudatus	13	Nam, Ki-Baek; Simeoni, Michelle; Sharp, Stuart P.; Hatchwell, Ben J.								Kinship affects investment by helpers in a cooperatively breeding bird										Helping behaviour in cooperative breeding systems has been attributed to kin selection, but the relative roles of direct and indirect fitness benefits in the evolution of such systems remain a matter of debate. In theory, helpers could maximize the indirect fitness benefits of cooperation by investing more in broods with whom they are more closely related, but there is little evidence for such fi…	277	1698	3299	3306	2010	PROCEEDINGS OF THE ROYAL SOCIETY B-BIOLOGICAL SCIENCES
29	Aegithalos caudatus	11	Hansell, MH								The function of lichen flakes and white spider cocoons on the outer surface of birds' nests										The predictions from two hypotheses for the adaptive significance of the application of lichen flakes and white silk cocoons to the outer surface of bird nests are compared. The hypotheses are: (a) concealment by resemblance to the branches to which the nest is attached, and (b) concealment by light reflection to make the nest dissolve into the background beyond the site of attachment. The predic…	30	2	303	311	1996	JOURNAL OF NATURAL HISTORY
30	Aegithalos caudatus	11	Holt, Chas A.; Fuller, Robert J.; Dolman, Paul M.								Breeding and post-breeding responses of woodland birds to modification of habitat structure by deer										Birds in woodland can be affected by increasing deer populations through changes to vegetation structure and potential impacts on foraging resources; these effects need to be better understood. Effects of deer browsing are reported from a replicated split-plot exclusion experiment in English coppiced woodland. All stages of growth were examined up to eight years after felling. We used standardise…	144	9	2151	2162	2011	BIOLOGICAL CONSERVATION
31	Aegithalos caudatus	11	Meade, Jessica; Nam, Ki-Baek; Beckerman, Andrew P.; Hatchwell, Ben J.				Beckerman, Andrew/D-3020-2011	Beckerman, Andrew/0000-0002-4797-9143			Consequences of 'load-lightening' for future indirect fitness gains by helpers in a cooperatively breeding bird										P>1. Helpers that invest energy in provisioning the offspring of related individuals stand to gain indirect fitness benefits from doing so. First, if the helper's effort is additional to that of the parents (additive) the productivity of the current breeding attempt can be increased. Secondly, if the parents reduce their workload (compensation) this can result in future indirect fitness gains to …	79	3	529	537	2010	JOURNAL OF ANIMAL ECOLOGY
32	Aegithalos caudatus	8	Sharp, Stuart P.; Hatchwell, Ben J.								Development of family specific contact calls in the Long-tailed Tit Aegithalos caudatus										Contact calls are ubiquitous among birds and are important in mediating social interactions. Despite this, the structure and function of these vocalizations have received relatively little attention, and the ontogeny of all bird calls is poorly known. In co-operatively breeding Long-tailed Tits Aegithalos caudatus, helpers preferentially provide care at the nests of close relatives and contact ca…	148	4	649	656	2006	IBIS
33	Aegithalos caudatus	7	Hatchwell, Ben J.; Sharp, Stuart P.; Simeoni, Michelle; McGowan, Andrew								Factors influencing overnight loss of body mass in the communal roosts of a social bird										1. Communal roosting behaviour in birds is hypothesized to reduce the risk of starvation by lowering the energetic expenditure required to survive the night. However, the metabolic benefit gained is likely to depend on various factors, including an individual's position within the roost.2. The long-tailed tit Aegithalos caudatus L. is a social species that lives in flocks during the non-breeding …	22	2	436	444	2011	BEHAVIORAL ECOLOGY
34	Aegithalos caudatus	6	HANSELL, MH								THE DEMAND FOR FEATHERS AS BUILDING MATERIAL BY WOODLAND NESTING BIRDS					3					The demand for feathers as a nest-building material was investigated by placing feather patches in woodland and garden sites between January and June 1993 and March and April 1994. The first of 18 species to breed in the area which use feathers in their nests was the Long-tailed Tit. The feather requirements of this species are known to far exceed that of the other species. Long-tailed Tits were …	23	2	367	372	2009	FUNCTIONAL ECOLOGY
35	Aegithalos caudatus	6	Meade, Jessica; Hatchwell, Ben J.								No direct fitness benefits of helping in a cooperative breeder despite higher survival of helpers										Helpers in cooperatively breeding species may gain direct fitness benefits that increase their survival probability and/or reproductive success. However, survival and productivity may be influenced by many other factors, including variation in dispersal, nepotistic interactions, or individual condition. High helper survival relative to nonhelpers has been reported in the long-tailed tit Aegithalo…	21	6	1186	1194	2010	BEHAVIORAL ECOLOGY
36	Aegithalos caudatus	5	Mcgowan, Andrew; Fowlie, Martin K.; Ross, Douglas J.; Hatchwell, Ben J.								Social organization of co-operatively breeding Long-tailed Tits Aegithalos caudatus: flock composition and kinship											7	6	1319	1322	2007	MOLECULAR ECOLOGY NOTES
37	Aegithalos caudatus	5	Nam, K. -B.; Meade, J.; Hatchwell, B. J.								Brood sex ratio variation in a cooperatively breeding bird										In cooperatively breeding species, the fitness consequences of producing sons or daughters depend upon the fitness impacts of positive (repayment hypothesis) and negative (local competition hypothesis) social interactions among relatives. In this study, we examine brood sex allocation in relation to the predictions of both the repayment and the local competition hypotheses in the cooperatively br…	24	4	904	913	2011	JOURNAL OF EVOLUTIONARY BIOLOGY
38	Aegithalos caudatus	4	Sharp, Stuart P.; Simeoni, Michelle; McGowan, Andrew; Nam, Ki-Baek; Hatchwell, Ben J.								Patterns of recruitment, relatedness and cooperative breeding in two populations of long-tailed tits										Cooperative breeding has evolved primarily in species in which individuals are organized into family groups, and kin selection is considered to be a major force in the evolution of helping behaviour. Family groups are generally thought to form through delayed or limited dispersal, but dispersal patterns vary considerably both between species and in different populations of the same species, and t…	149	1	170	174	2007	IBIS
39	Aegithalos caudatus	2	Nam, Ki-Baek; Meade, Jessica; Hatchwell, Ben J.								Do parents and helpers adjust their provisioning effort in relation to nestling sex in a cooperatively breeding bird?										In cooperatively breeding vertebrates, investment strategies of breeders and helpers may be affected by the sex of offspring that they provision because the fitness benefits gained from caring for sons or daughters will depend upon the fitness impacts of positive (i.e. local resource enhancement) and negative (i.e. local resource competition) social interactions between relatives. We investigated…	82	2	303	309	2011	ANIMAL BEHAVIOUR
40	Aegithalos caudatus	0	Cheke, Robert A.; Cheke, Anthony S.								Long-tailed tits feeding on peanuts.											91	7	286	287	1998	British Birds
41	Aegithalos caudatus	0	Glue, David								Peanuts as a winter food source for long-tailed tits.											91	7	287	289	1998	British Birds
42	Aegithalos caudatus	0	GREIGSMITH, PW								THE SIGNIFICANCE OF A HOVERING DISPLAY AT NESTS OF THE LONG-TAILED TIT AEGITHALOS CAUDATUS					41306						89		59	72	1984	BEHAVIOUR
43	Aegithalos caudatus	0	Gullett, Philippa; Hatchwell, Ben J.; Robinson, Robert A.; Evans, Karl L.				Robinson, Robert/B-8237-2009	Robinson, Robert/0000-0003-0504-9906			Phenological indices of avian reproduction: cryptic shifts and prediction across large spatial and temporal scales										Climate change-induced shifts in phenology have important demographic consequences, and are frequently used to assess species' sensitivity to climate change. Therefore, developing accurate phenological predictions is an important step in modeling species' responses to climate change. The ability of such phenological models to predict effects at larger spatial and temporal scales has rarely been a…	3	7	1864	1877	2013	ECOLOGY AND EVOLUTION
44	Aegithalos caudatus	0	Hatchwell, Ben J.; Sharp, Stuart P.; Beckerman, Andrew P.; Meade, Jessica				Beckerman, Andrew/D-3020-2011	Beckerman, Andrew/0000-0002-4797-9143			Ecological and demographic correlates of helping behaviour in a cooperatively breeding bird										The evolution of cooperation is a persistent problem for evolutionary biologists. In particular, understanding of the factors that promote the expression of helping behaviour in cooperatively breeding species remains weak, presumably because of the diverse nature of ecological and demographic drivers that promote sociality. In this study, we use data from a long-term study of a facultative cooper…	82	2	486	494	2013	JOURNAL OF ANIMAL ECOLOGY
45	Aegithalos caudatus	0	Kramer, David								Aggressive behaviour of long-tailed tits.											96	6	303	303	2003	British Birds
46	Aegithalos caudatus	0	Wemyss, Bob								Conflict between long-tailed tit and blue tit at nest site.											27		72	73	2007	Scottish Birds
1	Aix galericulata	6	DAVIES, AK; BAGGOTT, GK								EGG-LAYING, INCUBATION AND INTRASPECIFIC NEST PARASITISM BY THE MANDARIN DUCK AIX-GALERICULATA					2						24	1	1	10	2003	Scottish Birds
2	Aix galericulata	2	DAVIES, AK; BAGGOTT, GK								CLUTCH SIZE AND NESTING SITES OF THE MANDARIN DUCK AIX-GALERICULATA					1						91	8	327	327	1998	British Birds
3	Aix galericulata	0	Cosgrove, P.								Mandarin ducks in northern Scotland and the potential consequences for breeding goldeneye.										During 2002, an exceptional number of non native Mandarin Duck sightings were reported in and around Strathspey, including at least 2 breeding attempts. Recent records from the north of Scotland were collated and suggest that Mandarins are increasing in number and have begun to colonise sites close to and inside the core British Goldeneye breeding area. The pattern and origin of these records is …	25	8	280	285	1996	Irish Naturalists' Journal
4	Aix galericulata	0	Morris, P.I.								Mandarin ducks and mallards diving for acorns.											36		115	122	1989	BIRD STUDY
1	Alauda arvensis	320	Siriwardena, GM; Baillie, SR; Buckland, ST; Fewster, RM; Marchant, JH; Wilson, JD				Buckland, Stephen/A-1998-2012; Baillie, Stephen/H-3023-2013; Marchant, John/A-2510-2014	Baillie, Stephen/0000-0001-5126-9470;			Trends in the abundance of farmland birds: a quantitative comparison of smoothed Common Birds Census indices										1. Widespread declines in the populations of many British farmland birds have occurred since the early 1970s, We must understand the causes of these declines to make recommendations about conservation and agricultural management, and this can be approached by investigating the relationships, across species, between abundance and agricultural change. We describe novel, quantitative approaches to t…	35	1	24	43	1998	JOURNAL OF APPLIED ECOLOGY
2	Alauda arvensis	200	Wilson, JD; Evans, J; Browne, SJ; King, JR								Territory distribution and breeding success of skylarks Alauda arvensis on organic and intensive farmland in southern England										1, Skylark numbers declined by 51% between 1968 and 1995 on UK lowland farmland; a loss of approximately 3 million breeding birds. This study examined whether distribution and breeding success of skylarks varied with the cropping of organically and intensively managed fields in southern England in accordance with the hypothesis that changes in agricultural land-use and intensity of management hav…	34	6	1462	1478	1997	JOURNAL OF APPLIED ECOLOGY
3	Alauda arvensis	112	Robinson, RA; Wilson, JD; Crick, HQP				Robinson, Robert/B-8237-2009	Robinson, Robert/0000-0003-0504-9906			The importance of arable habitat for farmland birds in grassland landscapes										1. Over the last 25 years, populations of seed-eating birds have declined severely over most of western Europe. Local extinctions have occurred in grassland-dominated areas in western Britain, which may be influenced by loss in habitat diversity and a decline in the amount of arable cultivation.2. We used the large-scale British Breeding Bird Survey of 1998 to investigate the importance of arable…	38	5	1059	1069	2001	JOURNAL OF APPLIED ECOLOGY
4	Alauda arvensis	99	Cresswell, W				Cresswell, Will/B-1472-2013				Surprise as a winter hunting strategy in Sparrowhawks Accipiter nisus, Peregrines Falco peregrinus and merlins F-columbarius										Sparrowhawks Accipiter nisus, Peregrines Falco peregrinus and Merlins Falco columbarius were studied hunting Redshanks Tringa totanus, Dunlins Calidris alpina and Skylarks Alauda arvensis over three winters on a small Scottish estuary. Most Sparrowhawk and Merlin hunts consisted of a single attack (mean = 1.0 and 1.1, respectively), whereas Peregrine hunts often consisted of several attacks (mean…	138	4	684	692	1996	IBIS
5	Alauda arvensis	96	Chamberlain, DE; Wilson, JD; Fuller, RJ								A comparison of bird populations on organic and conventional farm systems in southern Britain										Field boundaries and fields on 22 pairs of organic and conventional farms in England and Wales were surveyed over three breeding seasons (April-July) and two autumn (September-November) and winter (December-February) periods in order to ascertain whether organic and conventional farms differed in the size and diversity of their associated bird populations. Species diversity was significantly high…	88	3	307	320	1999	BIOLOGICAL CONSERVATION
6	Alauda arvensis	93	Perkins, AJ; Whittingham, MJ; Bradbury, RB; Wilson, JD; Morris, AJ; Barnett, PR				Whittingham, Mark/C-4958-2008				Habitat characteristics affecting use of lowland agricultural grassland by birds in winter										Almost a third of the bird species designated as Species of European Conservation Concern exploit agricultural grasslands, yet few studies have focused on their use as foraging habitats for birds. This study investigated the influence of variation in sward structure, grassland management and landscape variables on the use of 77 grass fields by 14 field-feeding bird species wintering on lowland mi…	95	3	279	294	2000	BIOLOGICAL CONSERVATION
7	Alauda arvensis	89	Henderson, IG; Cooper, J; Fuller, RJ; Vickery, J								The relative abundance of birds on set-aside and neighbouring fields in summer										1. Set-aside is arable land rested from normal intensive operations, usually providing, in summer, a relatively sparse, weedy or grass-dominated sward without pesticide or fertilizer inputs. Set-aside is therefore potentially attractive to breeding and foraging birds and is predicted to contribute to increased avian biodiversity on arable or mixed farmland. Set-aside mimics low intensity farmland…	37	2	335	347	2000	JOURNAL OF APPLIED ECOLOGY
8	Alauda arvensis	88	Chamberlain, DE; Wilson, AM; Browne, SJ; Vickery, JA								Effects of habitat type and management on the abundance of skylarks in the breeding season										1. There is increasing evidence to link major declines in skylark populations in Britain to agricultural intensification. However, whether causal mechanisms identified through localized studies can be generalized to the national scale remains unknown. The abundance of breeding skylarks was determined by surveying singing males in over 600 randomly selected 1-km squares throughout Britain, in whic…	36	6	856	870	1999	JOURNAL OF APPLIED ECOLOGY
9	Alauda arvensis	82	Gregory, RD; Baillie, SR				Baillie, Stephen/H-3023-2013	Baillie, Stephen/0000-0001-5126-9470			Large-scale habitat use of some declining British birds										1. Large-scale habitat use of eight species of breeding birds was considered using data collected across Britain. The species were skylark Alauda arvensis (L.), dunnock Prunella modularis (L.), blackbird Turdus merula (L.), song thrush Turdus philomelos (L.), starling Sturnus vulgaris (L.), linnet Carduelis cannabina (L.), bullfinch Pyrrhula Pyrrhula (L.) and reed bunting Emberiza schoeniclus (L.…	35	5	785	799	1998	JOURNAL OF APPLIED ECOLOGY
10	Alauda arvensis	77	Vickery, J; Carter, N; Fuller, RJ								The potential value of managed cereal field margins as foraging habitats for farmland birds in the UK										Many farmland bird populations have exhibited marked declines in the last 20-30 years and there is growing evidence to link these declines to agricultural intensification. Field margin management is frequently proposed as a way of enhancing bird populations but there have been few attempts to assess the relative value of different management options. This paper aims to provide a preliminary asses…	89	2014-02-01	41	52	2002	AGRICULTURE ECOSYSTEMS & ENVIRONMENT
11	Alauda arvensis	72	Poulsen, JG; Sotherton, NW; Aebischer, NJ								Comparative nesting and feeding ecology of skylarks Alauda arvensis on arable farmland in southern England with special reference to set-aside										1. A study Of skylark Alauda arvensis L. breeding ecology in relation to crop type was carried out from April to August 1992 on arable land in southern England. Set-aside land was included in this comparative study.2. Territory density averaged 0.15 ha(-1). It was 2-3 times higher in fields of set-aside and grass, especially permanent pasture, than in winter and spring-sown cereals.3. Territory s…	35	1	131	147	1998	JOURNAL OF APPLIED ECOLOGY
12	Alauda arvensis	69	CRESSWELL, W				Cresswell, Will/B-1472-2013				SONG AS A PURSUIT-DETERRENT SIGNAL, AND ITS OCCURRENCE RELATIVE TO OTHER ANTI-PREDATION BEHAVIORS OF SKYLARK (ALAUDA-ARVENSIS) ON ATTACK BY MERLINS (FALCO-COLUMBARIUS)										Skylarks show a range of anti-predation behaviours including flocking, refuge-seeking and song. Responses by skylarks to merlin attack were recorded over three winters on a Scottish estuary to determine the effectiveness of song as a pursuit-deterrent signal, and its use with respect to other anti-predation options such as flocking. Mortality due to merlin predation was high. Skylarks used song a…	34	3	217	223	1994	BEHAVIORAL ECOLOGY AND SOCIOBIOLOGY
13	Alauda arvensis	69	Siriwardena, GM; Baillie, SR; Crick, HQP; Wilson, JD				Baillie, Stephen/H-3023-2013	Baillie, Stephen/0000-0001-5126-9470			The importance of variation in the breeding performance of seed-eating birds in determining their population trends on farmland										1. Changes in agriculture have been linked to widespread declines in farmland bird populations. One approach to the identification of the causes of observed population changes is to investigate historical changes in national demographic rates.2. We analysed the British Trust for Ornithology's nest records database to investigate whether long-term farmland population trends could have been driven …	37	1	128	148	2000	JOURNAL OF APPLIED ECOLOGY
14	Alauda arvensis	67	Robinson, RA; Sutherland, WJ				Robinson, Robert/B-8237-2009; Sutherland, William/B-1291-2013	Robinson, Robert/0000-0003-0504-9906;			The winter distribution of seed-eating birds: habitat structure, seed density and seasonal depletion										To understand the reasons for population change we need to understand the mechanisms through which it occurs. Throughout western Europe there have been declines in farmland birds. These declines have been paralleled by major changes in agricultural management, which have resulted in major changes in habitat structure. This paper describes the habitat selection at two scales (within and between fi…	22	4	447	454	1999	ECOGRAPHY
15	Alauda arvensis	64	Donald, PF; Evans, AD; Muirhead, LB; Buckingham, DL; Kirby, WB; Schmitt, SIA								Survival rates, causes of failure and productivity of Skylark Alauda arvensis nests on lowland farmland										This paper analyses data from 995 Skylark Alauda arvensis nests found on lowland farms in southern England from 1996 to 1998. The majority of recorded nest failures were caused by predation except in agricultural grass, where trampling and agricultural operations were equally important. Nest survival rates varied between crop types, nests in cereals being around twice as likely to succeed as nest…	144	4	652	664	2002	IBIS
16	Alauda arvensis	63	GREEN, R								FACTORS AFFECTING DIET OF FARMLAND SKYLARKS, ALAUDA-ARVENSIS											47	3	913	928	1978	JOURNAL OF ANIMAL ECOLOGY
17	Alauda arvensis	56	Bradbury, RB; Hill, RA; Mason, DC; Hinsley, SA; Wilson, JD; Balzter, H; Anderson, GQA; Whittingham, MJ; Davenport, IJ; Bellamy, PE				Balzter, Heiko/B-5976-2008; Whittingham, Mark/C-4958-2008; Hill, Ross/B-3871-2009; Hinsley, Shelley/E-6790-2012				Modelling relationships between birds and vegetation structure using airborne LiDAR data: a review with case studies from agricultural and woodland environments										Airborne LiDAR (Light Detection and Ranging) is a remote sensing technology that offers the ability to collect high horizontal sampling densities of high vertical resolution vegetation height data, over larger spatial extents than could be obtained by field survey. The influence of vegetation structure on the bird is a key mechanism underlying bird-habitat models. However, manual survey of vegeta…	147	3	443	452	2005	IBIS
18	Alauda arvensis	56	Newson, SE; Woodburn, RJW; Noble, DG; Baillie, SR; Gregory, RD				Baillie, Stephen/H-3023-2013	Baillie, Stephen/0000-0001-5126-9470			Evaluating the Breeding Bird Survey for producing national population size and density estimates					1					Capsule The BBS has potential for producing better estimates of habitat-specific densities and population sizes for many UK bird populations than those available previously.Aims To examine the use of the Breeding Bird Survey (BBS) in providing unbiased national population and habitat-specific density estimates of British birds.Methods Line transect data collected by volunteers in 1998 from 2287 1…	52		42	54	2005	BIRD STUDY
19	Alauda arvensis	52	Chamberlain, DE; Crick, HQP								Population declines and reproductive performance of Skylarks Alauda arvensis in different regions and habitats of the United Kingdom										Declines in the number of breeding Skylarks Alauda arvensis and changes in their reproductive performance were analysed using data from two long-running surveys co-ordinated by the British Trust for Ornithology: the Common Birds Census and the Nest Record Scheme. In the UK, the number of breeding Skylarks declined by approximately 55% between 1975 and 1994. This decline was steepest in agricultur…	141	1	38	51	1999	IBIS
20	Alauda arvensis	48	Boatman, ND; Brickle, NW; Hart, JD; Milsom, TP; Morris, AJ; Murray, AWA; Murray, KA; Robertson, PA				Robertson, Peter/H-1614-2013	Robertson, Peter/0000-0003-1567-8677			Evidence for the indirect effects of pesticides on farmland birds										Indirect effects of pesticides, operating through the food chain, have been proposed as a possible causal factor in the decline of farmland bird species. To demonstrate such a link, evidence is needed of (1) an effect of food abundance on breeding performance or survival; (2) an effect of breeding performance or survival on population change; and (3) pesticide effects on food resources, sufficien…	146		131	143	2004	IBIS
21	Alauda arvensis	44	Butler, SJ; Bradbury, RB; Whittingham, MJ				Whittingham, Mark/C-4958-2008; Butler, Simon/H-1703-2011				Stubble height affects the use of stubble fields by farmland birds										1. In the UK, over-wintered stubbles are an important foraging habitat for farmland birds, many of which are of current conservation concern. Maximizing the value of stubbles for farmland birds has largely focused on increasing food abundance but has ignored other aspects of foraging behaviour, such as predator avoidance and vigilance.2. In this study we investigated the effects of stubble height…	42	3	469	476	2005	JOURNAL OF APPLIED ECOLOGY
22	Alauda arvensis	41	Morris, AJ; Holland, JM; Smith, B; Jones, NE								Sustainable Arable Farming For an Improved Environment (SAFFIE): Managing winter wheat sward structure for Skylarks Alauda arvensis										Research has shown a close correlation between the decline of the UK Skylark Alauda arvensis population and the replacement of spring-sown cereals with winter-sown varieties, in which advanced sward development prevents successful multiple nesting attempts and reduces access for foraging. Widescale reversal of sowing times is unlikely for commercial reasons, so research has recently focused on wa…	146		155	162	2004	IBIS
23	Alauda arvensis	40	Browne, S; Vickery, J; Chamberlain, D								Densities and population estimates of breeding Skylarks Alauda arvensis in Britain in 1997					1					We present the results of a national survey of breeding Skylarks Alauda arvensis in Britain in 1997 carried out by the British Trust for Ornithology (BTO). Numbers of Skylarks and land-use types were recorded by volunteers in 608 1-km squares, selected using random stratification based on the Institute of Terrestrial Ecology's (ITE) Landscape Classification to avoid over- or under-sampling partic…	47		52	65	2000	BIRD STUDY
24	Alauda arvensis	38	Donald, PF; Buckingham, DL; Moorcroft, D; Muirhead, LB; Evans, AD; Kirby, WB								Habitat use and diet of skylarks Alauda arvensis wintering on lowland farmland in southern Britain										1. The habitat use and diet of skylarks wintering on lowland farms were studied to assess whether changes in agricultural practice could have reduced their most favoured wintering habitats or foods. Faecal samples were collected and soil seed densities were estimated. Skylarks in 122 cereal stubble fields in Oxfordshire were counted monthly to examine habitat use.2. Cereal stubble fields were mor…	38	3	536	547	2001	JOURNAL OF APPLIED ECOLOGY
25	Alauda arvensis	38	GOOCH, S; BAILLIE, SR; BIRKHEAD, TR				Baillie, Stephen/H-3023-2013	Baillie, Stephen/0000-0001-5126-9470			MAGPIE PICA-PICA AND SONGBIRD POPULATIONS - RETROSPECTIVE INVESTIGATION OF TRENDS IN POPULATION-DENSITY AND BREEDING SUCCESS										(1) British Trust for Ornithology Common Bird Census and Nest Record Scheme data were analysed for magpies and fifteen species of songbird: blackbird Turdus merula L., song thrush Turdus philomelos C. L. Brehm, mistle thrush Turdus viscivorous L., dunnock Punella modularis L., robin Erithacus rubecula L., chaffinch Fringilla coelebs L., greenfinch Carduelis chloris L., goldfinch Carduelis carduel…	28	3	1068	1086	1991	JOURNAL OF APPLIED ECOLOGY
26	Alauda arvensis	37	Mason, CF; Macdonald, SM								Influence of landscape and land-use on the distribution of breeding birds in farmland in eastern England					3					The relationships between landscape, land-use and the number of territories of eight species of birds, most with declining populations, were studied over 3 years in an area of largely arable agriculture in eastern England. Two species, skylark. Alauda arvensis and yellow wagtail Motaeilla flava, established territories within crops. More than half of skylark territories were in autumn-sown cereal…	251		339	348	2000	JOURNAL OF ZOOLOGY
27	Alauda arvensis	36	Pearce-Higgins, James W.; Grant, Murray C.								Relationships between bird abundance and the composition and structure of moorland vegetation					2					Capsule Variations in the composition, structure and heterogeneity of moorland vegetation are shown to affect the abundance of eight of nine moorland bird species, with implications for grazing management.Aims To determine how variation in vegetation characteristics affects breeding bird abundance on moorlands.Methods Bird and habitat data from 85 2-km(2) plots in south Scotland and northern Engl…	53		112	125	2006	BIRD STUDY
28	Alauda arvensis	34	Donald, PF; Evans, AD; Buckingham, DL; Muirhead, LB; Wilson, JD								Factors affecting the territory distribution of Skylarks Alauda arvensis breeding on lowland farmland					3					The distribution of breeding Skylarks on lowland farmland was examined on a monthly basis oil 13 farms in southern England in 1996. General linear models identified crop type and field area, drape and boundary characteristics as significant independent predictors of Skylark territory numbers ire most or all months. Models predicted territory numbers best during the height of the breeding sensory …	48		271	278	2001	BIRD STUDY
29	Alauda arvensis	34	Henderson, IG; Vickery, JA; Carter, N								The use of winter bird crops by farmland birds in lowland England										Winter food for farmland birds can be enhanced by planting seed-rich 'winter bird crops' (WBCs), the content of which is highly Variable. Data from three winters (October to March in 1998/1999, 1999/2000 and 2000/2001) were used to assess the value of different WBCs for lowland farmland birds in England, based on around 100 plots per winter. Densities of gamebirds, insectivorous and seed-eating p…	118	1	21	32	2004	BIOLOGICAL CONSERVATION
30	Alauda arvensis	32	Chamberlain, DE; Gregory, RD								Coarse and fine scale habitat associations of breeding Skylarks Alauda arvensis in the UK					1					The occurrence of breeding Skylarks, in terms of both density and presence/absence, was assessed from Breeding Bird,Survey data irt relation to habitat in a random sample of about 1500 1-km squares throughout the UK in two consecutive years, with particular emphasis on the farmland habitat. Upland grassland and other seminatural grassland habitats held the highest mean densities of Skylarks. With…	46		34	47	1999	BIRD STUDY
31	Alauda arvensis	32	Whittingham, MJ; Wilson, JD; Donald, PF				Whittingham, Mark/C-4958-2008				Do habitat association models have any generality? Predicting skylark Alauda arvensis abundance in different regions of southern England										Much of conservation science is based upon determining the use by organisms of different resources. However, the field data used to construct habitat association models generally come from a small number of sites covering a fraction of the area of interest. It is important therefore to assess the generality of those models for species occurring over large geographical areas. In this paper we test…	26	4	521	531	2003	ECOGRAPHY
32	Alauda arvensis	31	Sage, Rufus; Cunningham, Mark; Boatman, Nigel								Birds in willow short-rotation coppice compared to other arable crops in central England and a review of bird census data from energy crops in the UK										We present the results of spring and winter surveys of birds using 22 willow short-rotation coppice ( SRC) fields and 22 paired arable or grassland controls over a 5 year period in central and northern England. The study sites were linked to the first commercial wood-fuelled electricity plant in Yorkshire and were managed commercially. We use the findings of this study, in the context of other wo…	148		184	197	2006	IBIS
33	Alauda arvensis	30	Bradbury, RB; Browne, SJ; Stevens, DK; Aebischer, NJ								Five-year evaluation of the impact of the Arable Stewardship Pilot Scheme on birds										Agri-environment schemes could play a key role in the reversal of farmland bird declines. The effectiveness of the Arable Stewardship Pilot Scheme for delivering farmland birds was tested in a replicated, farm-scale field trial, in two lowland farmland regions of England. Changes in numbers of birds over five years were compared between control and scheme farms. In East Anglia, productivity of Gr…	146		171	180	2004	IBIS
34	Alauda arvensis	30	Van Strien, AJ; Pannekoek, J; Gibbons, DW								Indexing European bird population trends using results of national monitoring schemes: a trial of a new method					2					Many European countries have annual breeding bird monitoring schemes based on nationwide samples; most are in northern and western Europe. We have developed a method to produce yearly population indices of bird species across countries by combining the results of existing national schemes. The method takes into account the differences in population sizes per country, as well as the differences in…	48		200	213	2001	BIRD STUDY
35	Alauda arvensis	29	Wakeham-Dawson, A; Szoszkiewicz, K; Stern, K; Aebischer, NJ								Breeding skylarks Alauda arvensis on Environmentally Sensitive Area arable reversion grass in southern England: survey-based and experimental determination of density										1. In the South Downs and South Wessex Downs (southern England), designated an Environmentally Sensitive Area (ESA) in 1987 and 1993, respectively, farmers may undertake to conserve existing areas of downland turf(chalk grassland rich in plants and invertebrates) and to create new areas of grassland out of previously cultivated land (arable reversion), in exchange for annual payments. These areas…	35	5	635	648	1998	JOURNAL OF APPLIED ECOLOGY
36	Alauda arvensis	28	Fletcher, Kathy; Aebischer, Nicholas J.; Baines, David; Foster, Robin; Hoodless, Andrew N.								Changes in breeding success and abundance of ground-nesting moorland birds in relation to the experimental deployment of legal predator control										P>1. An 8-year-field experiment on moorland in northern England manipulated the abundance of legally controllable predators whilst maintaining consistent habitat conditions. Subsequent changes in both the breeding success and abundance of five ground-nesting bird species were monitored: lapwing Vanellus vanellus, golden plover Pluvialis apricaria, curlew Numenius arquata, red grouse Lagopus lagop…	47	2	263	272	2010	JOURNAL OF APPLIED ECOLOGY
37	Alauda arvensis	26	Gillings, S; Fuller, RJ								Habitat selection by Skylarks Alauda arvensis wintering in Britain in 1997/98					3					The results of a national survey of wintering Skylarks Alauda arvensis undertaken by the British Trust for Ornithology (BTO) between November 1997 and February 1998 are reported here. Over three visits, volunteers counted Skylarks and mapped habitats in 541 1-km squares selected from the Skylarks winter range based oil BTO Winter Atlas data and a stratified random sampling approach. Four landscap…	48		293	307	2001	BIRD STUDY
38	Alauda arvensis	26	Henderson, IG; Fuller, RJ; Conway, GJ; Gough, SJ								Evidence for declines in populations of grassland-associated birds in marginal upland areas of Britain					1					Capsule We report large declines among summer populations between 1968-80 and 2000.Aim To assess changes in the status of breeding populations of birds in pastoral uplands.Methods Volunteer observers revisited 13 areas of marginal upland in Britain where Common Birds Census data were collected during 1968-80. This allowed the status of 35 bird species to be examined over about 20 years and to mak…	51		12	19	2004	BIRD STUDY
39	Alauda arvensis	25	Wakeham-Dawson, A; Aebischer, NJ								Factors determining winter densities of birds on Environmentally Sensitive Area arable reversion grassland in southern England, with special reference to skylarks (Alauda arvensis)										In the South Downs and South Wessex Downs Environmentally Sensitive Areas (ESAs) in the UK, conservation emphasis was on maintenance and restoration (arable reversion) of grassland for landscape, archaeological and botanical purposes. This work investigated the effect of large-scale arable reversion on nationally declining grassland birds, especially skylarks, using repeated surveys (over 225 gra…	70	2014-03-02	189	201	1998	AGRICULTURE ECOSYSTEMS & ENVIRONMENT
40	Alauda arvensis	23	Poulsen, JG; Aebischer, NJ								Quantitative comparison of two methods of assessing diet of nestling Skylarks (Alauda arvensis)											112	4	1070	1073	1995	AUK
41	Alauda arvensis	21	Donald, PF; Vickery, JA						Aebischer, NJ; Evans, AD; Grice, PV; Vickery, JA		The importance of cereal fields to breeding and wintering Skylarks Alauda arvensis in the UK										Although agri-environment schemes and surplus reduction measures (particularly set-aside) create valuable wildlife habitats within the arable landscape, the area of land under intensively managed cereals remains huge, and territory densities of Skylarks Alauda arvensis are low in cereals compared with set-aside. However, simple comparisons of Skylark densities in different crop types take account…			140	150	2000	ECOLOGY AND CONSERVATION OF LOWLAND FARMLAND BIRDS
42	Alauda arvensis	21	Morris, Antony J.; Gilroy, James J.								Close to the edge: predation risks for two declining farmland passerines										Data on the breeding success of two crop-nesting passerines, Skylark Alauda arvensis and Yellow Wagtail Motacilla flava, were collected in relation to linear features within and surrounding arable crops. Both species were found to experience high rates of nest predation with increased proximity to field boundaries, although the exact nature of the relationship differed with species and, in the ca…	150		168	177	2008	IBIS
43	Alauda arvensis	20	Henderson, IG; Critchley, NR; Cooper, J; Fowbert, JA								Breeding season responses of Skylarks Alauda arvensis to vegetation structure in set-aside (fallow arable land)											143	2	317	321	2001	IBIS
44	Alauda arvensis	18	Bradbury, RB; Wilson, JD; Moorcroft, D; Morris, AJ; Perkins, AJ								Habitat and weather are weak correlates of nestling condition and growth rates of four UK farmland passerines										Agricultural intensification is believed to have driven declines of farmland bird populations and the invertebrates and weeds on which they feed. We investigated whether habitat and weather, as surrogates for food availability, influenced nestling growth rates and condition of four farmland passerines (Skylark Alauda arvensis , Chaffinch Fringilla coelebs , Linnet Carduelis cannabina and Yellowha…	145	2	295	306	2003	IBIS
45	Alauda arvensis	17	Donald, PF; Muirhead, LB; Buckingham, DL; Evans, AD; Kirby, WB; Gruar, DJ								Body condition, growth rates and diet of Skylark Alauda arvensis nestlings on lowland farmland										Factors affecting the diet, body condition and growth rates of Skylark chicks were assessed to examine their relationship to their agricultural environment during a critical period in the life cycle of this rapidly declining species. Rainfall explained the greatest amount of variation in body condition and growth rates and had a negative effect on both. Body condition indices were a good predicto…	143	4	658	669	2001	IBIS
46	Alauda arvensis	17	Watson, A; Rae, R								Some effects of set-aside on breeding birds in northeast Scotland					2					First-summer set-aside fields held more breeding species and higher wader densities than in the previous summer. They held more breeding species and higher densities of waders, Partridges (Perdix perdix) and Skylarks (Alauda arvensis) than fields in crop. Mowing nullified many breeding attempts. Corn Buntings bred in some first-summer set-aside fields but numbers were lower in other cases. Later …	44		245	251	1997	BIRD STUDY
47	Alauda arvensis	15	Poulsen, JG								Behaviour and parental care of Skylark Alauda arvensis chicks										I studied parental care and fledgling dispersion of Skylarks Alauda arvensis during the last 4 days of the nestling period and the first 4 days after the nestlings left the nest but before they were able to fly, The study compared parental care in three different crop types: spring barley, grass and set-aside, Both parents made more provisioning trips and delivered more food to fledglings than to…	138	3	525	531	1996	IBIS
48	Alauda arvensis	15	Siriwardena, GM; Crick, HQP; Baillie, SR; Wilson, JD				Baillie, Stephen/H-3023-2013	Baillie, Stephen/0000-0001-5126-9470			Agricultural habitat-type and the breeding performance of granivorous farmland birds in Britain					1					Conservation concern about granivorous birds has led to the implication of changing agricultural practices as causes of widespread population decline. We investigate relationships between breeding performance and the agricultural environment for ten granivorous farmland bird species (Stock Dove Columba oenas, Skylark Alauda arvensis, Trec Sparrow Passer montanus, Chaffinch Fringilla coelebs, Gree…	47		66	81	2000	BIRD STUDY
49	Alauda arvensis	14	Chamberlain, DE; Vickery, JA; Gough, S								Spatial and temporal distribution of breeding skylarks Alauda arvensis in relation to crop type in periods of population increase and decrease										The seasonal variation in Skylark Alauda arvensis occurrence, in terms of both presence and abundance, was examined in relation to crop type on a number of survey sites in English lowland farmland in two periods, 1965-70 and 1990-95. These two periods were selected to coincide with periods of population increase and decline respectively. We were able to consider the effects of changes in cropping…	88	1	61	73	2000	ARDEA
50	Alauda arvensis	14	THIRGOOD, SJ; LECKIE, FM; REDPATH, SM				Redpath, Steve/B-4640-2012				DIURNAL AND SEASONAL-VARIATION IN-LINE TRANSECT COUNTS OF MOORLAND PASSERINES					3						42		257	259	1995	BIRD STUDY
51	Alauda arvensis	13	Fuller, RJ; Ward, E; Hird, D; Brown, AF								Declines of ground-nesting birds in two areas of upland farmland in the south Pennines of England					2					Capsule We present evidence of large declines in numbers of breeding waders and passerines in some upland areas since the 1970s.Aims Changes in numbers of ground-nesting birds are documented for two areas of the Pennines and are qualitatively related to recent land-use history.Methods Territory mapping was used to estimate bird numbers on two areas (76 and 99 ha) in the Pennines for which more th…	49		146	152	2002	BIRD STUDY
52	Alauda arvensis	13	Pearce-Higgins, James W.; Stephen, Leigh; Douse, Andy; Langston, Rowena H. W.								Greater impacts of wind farms on bird populations during construction than subsequent operation: results of a multi-site and multi-species analysis										1. There has been a rapid increase in the development of renewable energy because of the need to combat climate change. One of the most widely used technologies has been onshore wind farms. These have the potential to affect birds through disturbance or collision, but the extent to which such developments cause general population declines, and therefore are of wider conservation concern, remains …	49	2	386	394	2012	JOURNAL OF APPLIED ECOLOGY
53	Alauda arvensis	12	Henderson, Ian G.; Ravenscroft, Neil; Smith, Gail; Holloway, Stephen								Effects of crop diversification and low pesticide inputs on bird populations on arable land										This 6-year experimental study measured the response of bird populations and abundance to combinations of mixed cropping and low pesticide regimes associated with a commercial crop rotation. The results show a rapid and sustained population increase among a wide range of bird species, in contrast to local regional trends for the same species. Seventy percent of the increase occurred within the fi…	129	2014-03-01	149	156	2009	AGRICULTURE ECOSYSTEMS & ENVIRONMENT
54	Alauda arvensis	11	Chamberlain, DE; Gough, S; Vickery, JA; Firbank, LG; Petit, S; Pywell, R; Bradbury, RB				Pywell, Richard/E-8738-2010; Petit, Sandrine/C-3310-2013				Rule-based predictive models are not cost-effective alternatives to bird monitoring on farmland										Monitoring bird populations is labour-intensive and requires expert knowledge. Development of more cost-effective methods of bird species monitoring is therefore desirable. Simple rule-based (RB) models were developed that predicted the presence of birds in lowland arable farmland in the breeding season. These were based on the presence of key habitat elements required by the birds identified fro…	101	1	1	8	2004	AGRICULTURE ECOSYSTEMS & ENVIRONMENT
55	Alauda arvensis	11	Evans, A. D.; Green, R. E.								An example of a two-tiered agri-environment scheme designed to deliver effectively the ecological requirements of both localised and widespread bird species in England										Intensification of agricultural practices over the last 50 years has resulted in the impoverishment of the wildlife associated with lowland farmland across much of Western Europe. This is perhaps best documented in birds. In England, populations of 15 species associated with lowland farmland have fallen by between 50% and 100%. Several species have become rare and localised. Others, formerly abun…	148		S279	S286	2007	JOURNAL OF ORNITHOLOGY
56	Alauda arvensis	11	Wilson, Jeremy D.	Donald, Paul F.; Vickery, Juliet A.							Foraging habitat selection by skylarks Alauda arvensis on lowland farmland during the nestling period.													91	101	2001	The ecology and conservation of skylarks (Alauda arvensis): proceedings of a conference held at the University of Southampton, 28-29 March 1999.
57	Alauda arvensis	10	Clarke, R; Combridge, M; Combridge, P								A comparison of the feeding ecology of wintering Hen Harriers Circus cyaneus centred on two heathland areas in England										Small passerines were the principal prey in pellets from Hen Harrier Circus cyaneus communal winter roosts in Breckland and the New Forest, Skylark Alauda arvensis remains predominate in the pellets from Breckland. Dunnock Prunella modularis and Greenfinch Carduelis chloris were also important. The contents of New Forest pellets reflected the position of each roost. In pellets from a roost on the…	139	1	4	18	1997	IBIS
58	Alauda arvensis	10	Pearce-Higgins, J.W.; Grant, M.C.								The effects of grazing-related variation in habitat on the distribution of moorland skylarks Alauda arvensis and meadow pipits Anthus pratensis.											67		155	163	2002	Aspects of Applied Biology
59	Alauda arvensis	9	Buchanan, GM; Pearce-Higgins, JW; Grant, MC								Observer variation in estimates of Meadow Pipit Anthus pratensis and Skylark Alauda arvensis abundance on moorland					1						53		92	95	2006	BIRD STUDY
60	Alauda arvensis	9	Hutchinson, John M. C.; Griffith, Simon C.				Griffith, Simon/A-1996-2010	Griffith, Simon/0000-0001-7612-4999			Extra-pair paternity in the Skylark Alauda arvensis										We present the first quantitative data on the genetic breeding system of a lark (Alaudidae), the Skylark Alauda arvensis. Using a set of eight microsatellite loci isolated in a variety of passerine species, we genotyped 171 offspring from 52 broods of Skylark and detected 35 extra-pair offspring (20%), in 14 different broods (27%). All offspring matched their putative mother, so there was no evid…	150	1	90	97	2008	IBIS
61	Alauda arvensis	9	Robinson, Robert A.	Donald, Paul F.; Vickery, Juliet A.							Feeding ecology of skylarks Alauda arvensis in winter - a possible mechanism for population decline?													129	138	2001	The ecology and conservation of skylarks (Alauda arvensis): proceedings of a conference held at the University of Southampton, 28-29 March 1999.
62	Alauda arvensis	9	Sage, Rufus; Cunningham, Mark; Haughton, Alison J.; Mallott, Mark D.; Bohan, David A.; Riche, Andrew; Karp, Angela				Riche, Andrew/A-8912-2011; Bohan, David/D-7992-2012; Haughton, Alison/A-7769-2013				The environmental impacts of biomass crops: use by birds of miscanthus in summer and winter in southwestern England										We compared birds in a group of established and well-managed miscanthus (Miscanthus x giganteus) fields in Somerset and East Devon, southwestern England, with plots of short rotation coppice (SRC) willow, arable crops and grassland in two winters and one summer. Following early spring cutting, 19 miscanthus fields grew taller, initially produced greater cover and were less weedy than SRC. As stub…	152	3	487	499	2010	IBIS
63	Alauda arvensis	8	Baines, David; Redpath, Stephen; Richardson, Michael; Thirgood, Simon				Redpath, Steve/B-4640-2012				The direct and indirect effects of predation by Hen Harriers Circus cyaneus on trends in breeding birds on a Scottish grouse moor										Two phases of an experimental reduction in management at Langholm Moor in southwest Scotland provided an insight into factors that determined trends in the abundance of moorland birds. In 1992 the historical control of breeding Hen Harriers Circus cyaneus stopped and in 2000 grouse moor management was discontinued. Golden Plover Pluvialis apricaria, Lapwing Vanellus vanellus, Curlew Numenius arqu…	150		27	36	2008	IBIS
64	Alauda arvensis	8	Chamberlain, Dan; Gough, Su; Anderson, Guy; Macdonald, Michael; Grice, Phil; Vickery, Juliet								Bird use of cultivated fallow 'Lapwing plots' within English agri-environment schemes										Capsule Northern Lapwings Vanellus vanellus occurred on about 40% of fallow plot options within agri-environment schemes; this could be increased by improved management and better placement of plots in the landscape. Aims To determine the use by Lapwings (and other species) of fallow plot options from the UK Countryside Stewardship and Higher Level Stewardship (HLS) agri-environment options. Meth…	56		289	297	2009	BIRD STUDY
65	Alauda arvensis	8	Smith, Barbara; Holland, John; Jones, Naomi; Moreby, Stephen; Morris, Anthony J.; Southway, Sue								Enhancing invertebrate food resources for skylarks in cereal ecosystems: how useful are in-crop agri-environment scheme management options?										UK agri-environment schemes rarely address within-crop biodiversity yet this habitat is used almost exclusively by some taxa. With the removal of set-aside, maximizing the ecological services provided by in-crop management options is critical. Field trials of small undrilled patches in the cropped area have been shown to increase skylark Alauda arvensis numbers and breeding productivity. This res…	46	3	692	702	2009	JOURNAL OF APPLIED ECOLOGY
66	Alauda arvensis	7	Cunningham, HM; Bradbury, RB; Chaney, K; Wilcox, A				Wilcox, Andrew/A-5593-2010				Effect of non-inversion tillage on field usage by UK farmland birds in winter					2					Capsule Several guilds of wintering farmland birds showed preferences for cereal fields established by non-inversion tillage, rather than ploughing.Aims To compare the effects of cereal crop establishment methods using non-inversion tillage and ploughing on field use by wintering farmland birds.Methods Cereal fields on commercial farms, established by non-inversion tillage or conventional ploughi…	52		173	179	2005	BIRD STUDY
67	Alauda arvensis	7	KalejtaSummers, B								Diet and habitat preferences of wintering passerines on the Taff/Ely saltmarshes					3					The ecology of passerines using saltmarshes in winter is poorly known. The distribution and abundance of passerines on the Taff/Ely saltmarshes were studied between October 1983 and March 1984. Twenty-two species of passerine were recorded. Their numbers fluctuated irregularly throughout the winter. The four most abundant species, Skylark, Chaffinch, Meadow Pipit and Reed Bunting, showed preferen…	44		367	373	1997	BIRD STUDY
68	Alauda arvensis	7	Mason, CF; Macdonald, SM								Winter bird numbers and land-use preferences in an arable landscape in eastern England										The winter bird assemblage and habitat preferences were studied in a largely arable landscape, dominated by winter cereals, in eastern England in one winter. A total of 32 species was recorded on 70 1-km transects but 11% of transects had no birds. Overall densities were low, Skylark Alauda arvensis being the most abundant species. Bird density was highest in the first winter period (October-Dece…	9	2	119	127	1999	BIRD CONSERVATION INTERNATIONAL
69	Alauda arvensis	7	Vickery, J.A.; Buckingham, D.L.	Donald, Paul F.; Vickery, Juliet A.							The value of set-aside for skylarks Alauda arvensis in Britain.													161	175	2001	The ecology and conservation of skylarks (Alauda arvensis): proceedings of a conference held at the University of Southampton, 28-29 March 1999.
70	Alauda arvensis	6	Amar, Arjun; Thirgood, Simon; Pearce-Higgins, James; Redpath, Steve				Amar, Arjun /F-3815-2011; Redpath, Steve/B-4640-2012				The impact of raptors on the abundance of upland passerines and waders										The issue of predator limitation of vertebrate prey populations is contentious, particularly when it involves species of economic or conservation value. In this paper, we examine the case of raptor predation on upland passerines and waders in Scotland. We analysed the abundance of five wader and passerine species on an upland sporting estate in southern Scotland during an eight-year period when h…	117	8	1143	1152	2008	OIKOS
71	Alauda arvensis	6	Boatman, Nigel D.; Pietravalle, Stephane; Parry, Hazel R.; Crocker, Joe; Irving, Paul V.; Turley, David B.; Mills, Jane; Dwyer, Janet C.				Parry, Hazel/C-3643-2009; Pietravalle, Stephane/D-8538-2011; Mills, Jane/J-6051-2012				Agricultural land use and Skylark Alauda arvensis: a case study linking a habitat association model to spatially explicit change scenarios										The development of forward scenarios is a useful method of envisaging the environmental implications of potential changes in land use, as a tool for policy development. In this paper, a spatially explicit case study is used to provide insight into the environmental impacts of Common Agricultural Policy reform on Skylark Alauda arvensis, a species which is widespread on arable farmland, breeds in …	152	1	63	76	2010	IBIS
72	Alauda arvensis	6	Donald, Paul F.; Morris, Tony J.								Saving the sky lark: new solutions for a declining farmland bird.										Research on the Sky lark Alauda arvensis has revealed a great deal about the causes of this species' sustained population decline in recent decades. Of the many changes in its farmland habitats, the most important, though not the only, cause of this decline is the switch from spring- to autumn-planting of cereals. The productivity of pairs in autumn-sown cereals may be as low as half that of bird…	98	11	570	578	2005	British Birds
73	Alauda arvensis	6	Gillings, Simon; Henderson, Ian G.; Morris, Antony J.; Vickery, Juliet A.								Assessing the implications of the loss of set-aside for farmland birds										Between 1988 and 2007, set-aside, a European Commission production control measure, took an average of 10% of arable farmland in the EU out of production each year. In 2007, the set-aside rate was set to 0% and the scheme was later abandoned altogether. By assessing associations of farmland birds with set-aside and quantifying the extent of set-aside loss, this study aims to assess the implicatio…	152	4	713	723	2010	IBIS
74	Alauda arvensis	5	Buckingham, D.L.	Donald, Paul F.; Vickery, Juliet A.							Within-field habitat selection by wintering skylarks Alauda arvensis in southwest England.													149	158	2001	The ecology and conservation of skylarks (Alauda arvensis): proceedings of a conference held at the University of Southampton, 28-29 March 1999.
75	Alauda arvensis	5	Field, Rob H.; Kirby, Will B.; Bradbury, Richard B.								Conservation tillage encourages early breeding by Skylarks Alauda arvensis					1						54		137	141	2007	BIRD STUDY
76	Alauda arvensis	4	Clarke, Roger; Combridge, Pete; Middleton, Nigel								Monitoring the diets of farmland winter seed-eaters through raptor pellet analysis.										Pellets collected from winter roosts of Hen Harriers Circus cyaneus in Norfolk, Cambridgeshire and Hampshire were examined for plant seeds that occurred with the remains of passerines which would have been caught mostly in open farmiand.The predominant seeds associated with Sky Larks Alauda arvensis, Hedge Accentors Prunella modularis, Greenfinches Carduelis chloris, Linnets C. cannobina and Reed…	96	8	360	375	2003	British Birds
77	Alauda arvensis	4	Donald, P.F.; Buckingham, D.L.; Muirhead, L.B.; Evans, A.D.; Kirby, W.B.; Schmitt, S.I.A.	Donald, Paul F.; Vickery, Juliet A.							Factors affecting clutch size, hatching rates and partial brood losses in skylark Alauda arvensis nests on lowland farmland.													63	77	2001	The ecology and conservation of skylarks (Alauda arvensis): proceedings of a conference held at the University of Southampton, 28-29 March 1999.
78	Alauda arvensis	4	Dougall, T.W.								Movement and mortality of British-ringed skylarks Alauda arvensis.										The national archive of recoveries of British-ringed Skylarks to 31 December 1992 (n = 201 birds) was analysed in terms of distances and directions of movement, and mortality factors. In the British Isles, the species is rather sedentary compared with elsewhere in Europe, with only nine overseas recoveries; and two-thirds of recoveries were within 10 km of the ringing site. There is no evidence o…	17	2	81	92	1996	Ringing & Migration
79	Alauda arvensis	4	Douglas, David J. T.; Benton, Tim G.; Vickery, Juliet A.				Benton, Tim/C-6493-2009				Contrasting patch selection of breeding Yellowhammers Emberiza citrinella in set-aside and cereal crops										Capsule No strong determinants of patch selection were found in set-aside; in cereal fields tractor tramlines were favoured.Aims To examine and compare the factors influencing patch selection by Yellowhammers foraging for nestling food in set-aside and cereals.Methods Observations of adults provisioning nestlings were made at 21 nests on lowland mixed farmland in northeast Scotland. Vegetation me…	57	1	69	74	2010	BIRD STUDY
80	Alauda arvensis	4	Field, Rob H.; Anderson, Guy Q. A.; Gruar, Derek J.								Land-use correlates of breeding performance and diet in Tree Sparrows Passer montanus					3					Capsule Chick diet varies seasonally and between wet and dry habitats, and there is little evidence for a link between habitat type and productivity.Aim To examine the influence of habitat composition and diversity on Tree Sparrow productivity and nestling diet in a wide variety of locations across the UK.Methods Productivity, chick diet and habitat data were collected from Tree Sparrow nestbox c…	55		280	289	2008	BIRD STUDY
81	Alauda arvensis	4	Gillings, Simon	Donald, Paul F.; Vickery, Juliet A.							Factors affecting the distribution of skylarks Alauda arvensis wintering in Britain and Ireland during the early 1980s.													115	128	2001	The ecology and conservation of skylarks (Alauda arvensis): proceedings of a conference held at the University of Southampton, 28-29 March 1999.
82	Alauda arvensis	4	Murray, K.A.; Wilcox, A.; Stoate, A.								A simultaneous assessment of farmland habitat use by breeding skylarks and yellowhammers.											67		121	127	2002	Aspects of Applied Biology
83	Alauda arvensis	4	Thompson, Helen M.; Tarrant, Kenneth A.; Hart, Andrew D.M.				Thompson, Helen/H-7753-2013	Thompson, Helen/0000-0001-5137-5214	Grieg-Smith, Peter; Frampton, Geoff; Hardy, Tony		Exposure of starlings, house sparrows and skylarks to pesticides.													194	199	1992	Pesticides, cereal farming and the environment: the Boxworth project.
84	Alauda arvensis	4	Wolfenden, Ian H.; Peach, Will J.	Donald, Paul F.; Vickery, Juliet A.							Temporal changes in the survival rates of skylarks Alauda arvensis in northwest England.													79	89	2001	The ecology and conservation of skylarks (Alauda arvensis): proceedings of a conference held at the University of Southampton, 28-29 March 1999.
85	Alauda arvensis	3	Boatman, Nigel D.; Jones, Naomi E.; Conyers, Simon T.; Pietravalle, Stephane								Development of plant communities on set-aside in England										A survey of land taken out of production from the early 1990s onwards under the European Union's set-aside policy in England was carried out in 2008, to record plant communities in set-aside of different ages, effects of distance from the field edge, sowing and soil type. Communities were classified using the Countryside Vegetation System (CVS), Ellenberg indicators and Grime CSR strategy. Specie…	143	1	8	19	2011	AGRICULTURE ECOSYSTEMS & ENVIRONMENT
86	Alauda arvensis	3	Dougall, T.W.								Biometrics and sex ratios of skylarks Alauda arvensis in winter in south-east Scotland.										Biometric data (wing length, tail length, head + bill, Maximum tarsus) were collected from 255 individual Skylarks in winter at Musselburgh on the Lothian coast. Wing length and head+bill were measured most consistently by a single operator in the field. Winglength and tail length measurements were polymodally distributed, which allowed most birds to be allocated a sex class. Variation in the pat…	18	1	37	49	1997	Ringing & Migration
87	Alauda arvensis	3	Rahman, Md Lutfor; Tarrant, Sam; McCollin, Duncan; Ollerton, Jeff								The conservation value of restored landfill sites in the East Midlands, UK for supporting bird communities										There has been a rapid decline of grassland bird species in the UK over the last four decades. In order to stem declines in biodiversity such as this, mitigation in the form of newly created habitat and restoration of degraded habitats is advocated in the UK biodiversity action plan. One potential restored habitat that could support a number of bird species is re-created grassland on restored lan…	20	9	1879	1893	2011	BIODIVERSITY AND CONSERVATION
88	Alauda arvensis	3	Robinson, Robert A.								The diet of seed-eating birds on lowland farmland.										The diet of Sky Larks Alauda arvensis, Yellowhammers Emberiza citrinella and Corn Buntings E. calandra on arable farmland in north Norfolk was examined by identifying the remains found in faecal pellets. Winter diet was dominated by cereal grains and a few common weed species, in proportion to their availability and size. Cereal leaf was prevalent in areas where seeds were scarce. Changes in farm…	97	9	464	467	2004	British Birds
89	Alauda arvensis	3	Wright, Lucy J.; Hoblyn, Ron A.; Sutherland, William J.; Dolman, Paul M.				Sutherland, William/B-1291-2013				Reproductive success of Woodlarks Lullula arborea in traditional and recently colonized habitats					3					Capsule Set-aside schemes have allowed breeding Woodlarks to colonize farmland, but heathland and forestry habitats remain the stronghold.Aims To determine which habitats provide the best conditions for breeding Woodlarks and whether a buffer effect is operating, with density increasing faster in the poorer quality habitat as the population grows.Methods Habitat colonization was examined and bree…	54		315	323	2007	BIRD STUDY
90	Alauda arvensis	2	Atkinson, PW; Robinson, RA						Chamberlain, D; Wilson, A		Landscape diversity and bird populations: the need for regionally flexible and scale-dependent agri-environment schemes										Traditional mixed farming practices have declined in the UK, resulting in marked regional differences in arable and pastoral farming. These changes have contributed to increased rates of decline and local extinctions of seed-eating birds in now grass-dominated agricultural landscapes. The species that make up the UK Farmland Bird Indicator are associated with arable or mixed landscape features, a…			289	299	2002	AVIAN LANDSCAPE ECOLOGY: PURE AND APPLIED ISSUES IN THE LARGE-SCALE ECOLOGY OF BIRDS
91	Alauda arvensis	2	Boatman, N.D.; Bence, S.L.								Management of set-aside to enhance biodiversity: the wild bird cover option.											62		73	78	2000	Aspects of Applied Biology
92	Alauda arvensis	2	Chamberlain, D.E.	Donald, Paul F.; Vickery, Juliet A.							Habitat associations and trends in reproductive performance of skylarks Alauda arvensis breeding in the uplands of the UK.													25	39	2001	The ecology and conservation of skylarks (Alauda arvensis): proceedings of a conference held at the University of Southampton, 28-29 March 1999.
93	Alauda arvensis	2	Ewald, JA; Aebischer, NJ; Brickle, NW; Moreby, SJ; Potts, GR; Wakeham-Dawson, A						Chamberlain, D; Wilson, A		Spatial variation in densities of farmland birds in relation to pesticide use and avian food resources										Since 1970, in a 62 km(2) area of West Sussex, The Game Conservancy Trust has monitored autumn dispersion and productivity of Grey Partridges Perdix perdix, the abundance of invertebrates and plants in cereals in June, and the use of pesticides on crops. Locations of singing Corn Buntings Miliaria calandra and Skylarks Alauda arvensis within the study area are available from 1995-1997. Contours o…			305	312	2002	AVIAN LANDSCAPE ECOLOGY: PURE AND APPLIED ISSUES IN THE LARGE-SCALE ECOLOGY OF BIRDS
94	Alauda arvensis	2	Field, Rob H.; Morris, Anthony J.; Grice, Phil V.; Cooke, Andrew								The provision of winter bird food by the English Environmental Stewardship scheme										Environmental Stewardship (ES) is the main mechanism for reversing the decline in farmland birds in England, and includes a range of options designed to provide winter foraging for seed-eating species. We estimated granivorous songbird densities on ES options designed to provide winter food, on farms within the Entry Level (ELS) or Higher Level (HLS) strata of ES. ES Wild Bird Mixtures (WBMs) hos…	153	1	14	26	2011	IBIS
95	Alauda arvensis	2	Hart, J.D.; Murray, A.W.A.; Milsom, T.P.; Parrott, D.; Allcock, J.; Watola, G.V.; Bishop, J.D.; Robertson, P.A.				Robertson, Peter/H-1614-2013	Robertson, Peter/0000-0003-1567-8677			The abundance of farmland birds within arable fields in relation to seed density.											67		221	228	2002	Aspects of Applied Biology
96	Alauda arvensis	2	Milsom, T.P.; Langton, S.D.; Bishop, J.D.; Hart, J.D.; Parkin, W.K.; Allen, D.S.; Kirkham, F.W.; Lyons, H.A.								Habitat models of bird species distribution on coastal grazing marshes: a multi-site comparison.											67		147	154	2002	Aspects of Applied Biology
97	Alauda arvensis	2	Milsom, T.P.; Langton, S.D.; Parkin, W.K.; Allen, D.S.; Bishop, J.D.; Hart, J.D.	Donald, Paul F.; Vickery, Juliet A.							Coastal grazing marshes as a breeding habitat for skylarks Alauda arvensis.													41	51	2001	The ecology and conservation of skylarks (Alauda arvensis): proceedings of a conference held at the University of Southampton, 28-29 March 1999.
98	Alauda arvensis	2	Rahman, Md Lutfor; Tarrant, Sam; McCollin, Duncan; Ollerton, Jeff								Influence of habitat quality, landscape structure and food resources on breeding skylark (Alauda arvensis) territory distribution on restored landfill sites										The skylark (Alauda arvensis) lost half its number after it underwent a decade of rapid decline from the mid-1970s onwards and since then has continued to decline albeit at a reduced rate. Its listing as a UK Red-List and Biodiversity Action Plan (BAP) Priority Species has helped focus conservation action in an attempt to halt the decline and stabilise populations by restoring degraded habitats o…	105	3	281	287	2012	LANDSCAPE AND URBAN PLANNING
99	Alauda arvensis	2	Saunders, H.J.								Bird species as indicators to assess the impact of integrated crop management on the environment: a comparative study.											62		47	53	2000	Aspects of Applied Biology
100	Alauda arvensis	2	Swetnam, Ruth D.; Wilson, Jeremy D.; Bradbury, Richard B.; Krebs, John R.	Donald, Paul F.; Vickery, Juliet A.							Modelling the effects of agricultural change on skylark numbers using GIS: a pilot study.													209	219	2001	The ecology and conservation of skylarks (Alauda arvensis): proceedings of a conference held at the University of Southampton, 28-29 March 1999.
101	Alauda arvensis	1	Clarke, Roger								British Montagu's Harriers: What governs their numbers?										In Britain, the status of Montagu's Harrier Circus pygargus has remained tenuous over the past few decades, whilst the Marsh Harrier C. neruginosus population has grown considerably. Is breeding effort of Montagu's Harrier in Britain governed by factors in breeding or wintering areas? Breeding attempts can go unnoticed in arable farmland, where harvesting is a threat and increased use of silage g…	41	2014-03-02	143	158	2002	Ornithologischer Anzeiger
102	Alauda arvensis	1	Donald, Paul F.								Short and variable incubation period of the sky lark.											98	11	607	608	2005	British Birds
103	Alauda arvensis	1	Dougall, T.W.								Mass and visible fat scores of skylarks Alauda arvensis in winter in south-east Scotland.										Over six winters, from 1990/91 to 1995/96, Skylarks were caught and ringed at Musselburgh, Lothian. The birds were sexed from biometrics, and mass and visible fat score were recorded in the field. This revealed that there was some sexual dimorphism in mass as well as size. Although males were significantly heavier than females (mean mass being 42.3g, range 35.1 - 51.4g, female 36.3g, range 29.6-4…	19	4	283	297	1999	Ringing & Migration
104	Alauda arvensis	1	Edwards, P.J.; Schmitt, S.I.A.; Jenner, T.; Cracknell, J.; Everett, C.J.	Donald, Paul F.; Vickery, Juliet A.							Research into the value of field margins for skylarks Alauda arvensis.													203	207	2001	The ecology and conservation of skylarks (Alauda arvensis): proceedings of a conference held at the University of Southampton, 28-29 March 1999.
105	Alauda arvensis	1	Guillem, E.E.; Barnes, A.P.; Rounsevell, M.D.A.; Renwick, A.								Farmer-induced land-use change and its impact on farmland bird populations.										Agricultural intensification has led to a dramatic decline in UK farmland bird populations. In order to assess the impacts of agricultural policies that have shifted towards environmental protection, a fanner-induced land-use change model is applied to the skylark Alauda arvensis in the data-rich Lunan catchment, Scotland, An agent-based modelling framework has been developed that considers indiv…	93		193	197	2009	Aspects of Applied Biology
106	Alauda arvensis	1	Siriwardena, Gavin M.; Wilson, Jeremy D.; Baillie, Stephen R.; Crick, Humphrey Q.P.	Donald, Paul F.; Vickery, Juliet A.							Can the historical CBC trend for skylarks Alauda arvensis be 'recovered' using present-day agricultural habitat preferences and changes in agricultural land-use?													53	60	2001	The ecology and conservation of skylarks (Alauda arvensis): proceedings of a conference held at the University of Southampton, 28-29 March 1999.
107	Alauda arvensis	1	Stoate, C; Murray, K						Chamberlain, D; Wilson, A		A new design for the arable landscape and its use by farmland passerines										Management of wild gamebirds involves the development of habitat diversity within arable landscapes. Such a management system has been adopted at Loddington (Leicestershire) since 1993 and includes crop mixtures designed specifically for wildlife. We describe research into use of managed habitats by two passerine species (Skylark Alauda arvensis and Yellowhammer Emberiza citrinella) for foraging.…			342	345	2002	AVIAN LANDSCAPE ECOLOGY: PURE AND APPLIED ISSUES IN THE LARGE-SCALE ECOLOGY OF BIRDS
108	Alauda arvensis	1	Wakeham-Dawson, Andrew; Aebischer, Nicholas J.	Donald, Paul F.; Vickery, Juliet A.							Management of grassland for skylarks Alauda arvensis in downland Environmentally Sensitive Areas in southern England.													189	201	2001	The ecology and conservation of skylarks (Alauda arvensis): proceedings of a conference held at the University of Southampton, 28-29 March 1999.
109	Alauda arvensis	0	Allen, N.V.								The skylark on Exmoor, 1996. A survey of the skylark (Alauda arvensis, L.) in its breeding areas within Exmoor National Park.											23		31	35	1997	Exmoor Naturalist
110	Alauda arvensis	0	Donald, Paul F.; Vickery, Juliet A.	Donald, Paul F.; Vickery, Juliet A.							The ecology and conservation of skylarks (Alauda arvensis): proceedings of a conference held at the University of Southampton, 28-29 March 1999.													i	xii, 1-220	2001	The ecology and conservation of skylarks (Alauda arvensis): proceedings of a conference held at the University of Southampton, 28-29 March 1999.
111	Alauda arvensis	0	Evans, J.; Wilson, J.D.; Browne, S.J.								The effect of organic farming regimes on breeding and winter bird populations. Part 3. Habitat selection and breeding success of skylarks Alauda arvensis on organic and conventional farmland.											154		1	34	1995	BTO Research Report
112	Alauda arvensis	0	Ewald, J.A.; Aebischer, N.J.; Brickle, N.W.; Moreby, S.J.; Potts, G.R.; Wakeham-Dawson, A.						Chamberlain, Dan; Wilson, Andy		Spatial variation in densities of farmland birds in relation to pesticide use and avian food resources.													305	312	2001	Avian landscape ecology: pure and applied issues in the large-scale ecology of birds. Proceedings of the Eleventh Annual IALE (UK) Conference, held at University of East Anglia, 10th-13th September 2002.
113	Alauda arvensis	0	Gibson, Alan								Sky lark using birdwatchers as refuge from merlins.											98	1	46	47	2005	British Birds
114	Alauda arvensis	0	Green, Mick								Densities of breeding skylarks Alauda arvensis in upland Wales.										Numbers of Skylarks breeding on four sites in upland Wales were recorded during general bird surveys. Densities found were much higher than other recent records and emphasise the importance of the Welsh uplands for this declining species.	4	3	219	220	2005	Welsh Birds
115	Alauda arvensis	0	MacDonald, Michael A.; Maniakowski, Michal; Cobbold, Gail; Grice, Philip V.; Anderson, Guy Q. A.								Effects of agri-environment management for stone curlews on other biodiversity										Two-hectare unsown, tilled fallow plots put in place under agri-environment schemes for stone curlews Burhinus oedicnemus in England were surveyed for other bird species, brown hares Lepus europaetts, carabid beetles, vascular plants, butterflies and bumblebees. The results were compared with those from surveys within the crop in the same field and in neighbouring fields. This was done to test wh…	148	1	134	145	2012	BIOLOGICAL CONSERVATION
116	Alauda arvensis	0	Poulsen, John Grynderup								Orientation of sky lark in field.											89	5	235	236	1996	British Birds
117	Alauda arvensis	0	Smith, Harold; Vilkaitis, Harry								The skylark Alauda arvensis in the Sorby Recording Area.											34		2	17	1999	Sorby Record
118	Alauda arvensis	0	Stoate, C.; Murray, K.						Chamberlain, Dan; Wilson, Andy		A new design for the arable landscape and its use by farmland passerines.													342	345	2001	Avian landscape ecology: pure and applied issues in the large-scale ecology of birds. Proceedings of the Eleventh Annual IALE (UK) Conference, held at University of East Anglia, 10th-13th September 2002.
1	Alca torda	71	LLOYD, CS								FACTORS AFFECTING BREEDING OF RAZORBILLS ALCA-TORDA ON SKOKHOLM											121	2	165	176	1979	IBIS
2	Alca torda	57	WAGNER, RH								THE PURSUIT OF EXTRA-PAIR COPULATIONS BY MONOGAMOUS FEMALE RAZORBILLS - HOW DO FEMALES BENEFIT										Monogamous female razorbills Alca torda actively sought extra-pair copulations (EPCs) in mating arenas outside their nesting colony. Females showed marked variation in promiscuity, defined as the number of EPCs they accepted (0-7), and in receptivity, defined as the percentage of EPC opportunities accepted (0%-100%). The opportunity of females to encounter males for EPCs was measured by (a) the t…	216		73	81	1988	JOURNAL OF ZOOLOGY
3	Alca torda	56	WANLESS, S; MORRIS, JA; HARRIS, MP				Wanless, Sarah/K-2338-2012	Wanless, Sarah/0000-0002-2788-4606			DIVING BEHAVIOR OF GUILLEMOT URIA-AALGE, PUFFIN FRATERCULA-ARCTICA AND RAZORBILL ALCA-TORDA AS SHOWN BY RADIO-TELEMETRY					1						29	6	455	464	1992	BEHAVIORAL ECOLOGY AND SOCIOBIOLOGY
4	Alca torda	38	WANLESS, S; HARRIS, MP				Wanless, Sarah/K-2338-2012	Wanless, Sarah/0000-0002-2788-4606			TIME SPENT AT THE COLONY BY MALE AND FEMALE GUILLEMOTS URIA-AALGE AND RAZORBILLS ALCA-TORDA					3						104	2	413	423	2002	CONDOR
5	Alca torda	36	WAGNER, RH								EXTRA-PAIR COPULATIONS IN A LEK - THE SECONDARY MATING SYSTEM OF MONOGAMOUS RAZORBILLS										I studied the mating strategies of razorbills Alca torda, a monogamous colonial seabird, during 1987-1989 in Wales, U.K. The outstanding feature of the study population's mating system was the performance of most copulations in mating arenas outside the colony. Females visited the arenas and sometimes accepted extra-pair copulations (EPCs), and males aggressively competed for EPCs. During the fer…	48	3	239	252	1977	BIRD-BANDING
6	Alca torda	35	LLOYD, CS; PERRINS, CM								SURVIVAL AND AGE AT 1ST BREEDING IN RAZORBILL (ALCA-TORDA)											31	1	63	71	1992	BEHAVIORAL ECOLOGY AND SOCIOBIOLOGY
7	Alca torda	34	WANLESS, S; HARRIS, MP; MORRIS, JA				Wanless, Sarah/K-2338-2012	Wanless, Sarah/0000-0002-2788-4606			A COMPARISON OF FEEDING AREAS USED BY INDIVIDUAL COMMON MURRES (URIA-AALGE), RAZORBILLS (ALCA-TORDA) AND AN ATLANTIC PUFFIN (FRATERCULA-ARCTICA) DURING THE BREEDING-SEASON											13	1	16	24	1990	COLONIAL WATERBIRDS
8	Alca torda	29	Thaxter, Chris B.; Daunt, Francis; Hamer, Keith C.; Watanuki, Yutaka; Harris, Mike P.; Gremillet, David; Peters, Gerrit; Wanless, Sarah				Daunt, Francis/K-6688-2012; Wanless, Sarah/K-2338-2012	Wanless, Sarah/0000-0002-2788-4606			Sex-specific food provisioning in a monomorphic seabird, the common guillemot Uria aalge: nest defence, foraging efficiency or parental effort?										Sexual differences in food provisioning rates of monomorphic seabirds are well known but poorly understood. Here, we address three hypotheses that attempt to explain female-biased food provisioning in common guillemots Uria aalge: (1) males spend more time in nest defence, (2) females have greater foraging efficiency, and (3) males allocate a greater proportion of foraging effort to self-maintena…	40	1	75	84	2009	JOURNAL OF AVIAN BIOLOGY
9	Alca torda	29	Wanless, S; Harris, MP; Greenstreet, SPR				Wanless, Sarah/K-2338-2012	Wanless, Sarah/0000-0002-2788-4606			Summer sandeel consumption by seabirds breeding in the Firth of Forth, south-east Scotland										The industrial fishery for lesser sandeels (Ammodytes marinus) is currently the largest single-species fishery in the North Sea and this species is also the main food of many seabirds breeding in colonies in this area. It has been suggested that inshore sandeel fisheries could have adverse consequences for local seabird populations. One potential area of concern is the fishing grounds on the bank…	87	2	177	198	1999	ARDEA
10	Alca torda	26	Camphuysen, K; Webb, A								Multi-species feeding associations in North Sea seabirds: Jointly exploiting a patchy environment										We studied the foraging distribution and the formation of multi-species feeding associations of seabirds and marine mammals off the British east coast. The local top-predator community comprised c. 34 species of seabirds, two pinnipeds and eight cetaceans. It appeared that multi-species feeding associations (MSFA's),with rather low species richness and diversity, were commonly formed around fishi…	55	6	1141	1151	1998	ICES JOURNAL OF MARINE SCIENCE
11	Alca torda	25	WAGNER, RH								CONFIDENCE OF PATERNITY AND PARENTAL EFFORT IN RAZORBILLS										I quantified parental effort in biparentally caring Razorbills (Alca torda) to test whether variation in male effort was related to variation in their mates' receptivity to extra-pair copulations. On average, males contributed approximately equally to their mates in chick feedings and overnight nest attendance. There was, however, marked variation in relative male effort, with the proportion of m…	109	3	556	562	1992	AUK
12	Alca torda	22	HUDSON, PJ								NEST SITE CHARACTERISTICS AND BREEDING SUCCESS IN THE RAZORBILL ALCA-TORDA											124	3	355	359	1982	IBIS
13	Alca torda	16	Harris, M.P.; Wanless, S.; Rothery, P.								Adult survival rates of shag Phalacrocorax aristotelis, common guillemot Uria aalge, razorbill Alca torda, puffin Fratercula arctica and kittiwake Rissa tridactyla on the Isle of May 1986-96.											2	41367	133	150	2000	Atlantic Seabirds
14	Alca torda	14	Wanless, Sarah; Frederiksen, Morten; Walton, John; Harris, Mike P.				Frederiksen, Morten/A-7542-2008; Wanless, Sarah/K-2338-2012	Frederiksen, Morten/0000-0001-5550-0537; Wanless, Sarah/0000-0002-2788-4606			Long-term changes in breeding phenology at two seabird colonies in the western North Sea										There is compelling evidence that the breeding phenology of many species has changed substantially in recent decades. However, taxonomic and spatial variation in the direction and rate of change is still not well understood. We explored these issues by analysing a dataset containing information on first egg dates of 10 species of seabird at two major breeding colonies (86 km apart) in the western…	151	2	274	285	2009	IBIS
15	Alca torda	12	HARRIS, MP; WANLESS, S				Wanless, Sarah/K-2338-2012	Wanless, Sarah/0000-0002-2788-4606			THE BREEDING BIOLOGY OF RAZORBILLS ALCA-TORDA ON THE ISLE-OF-MAY					2						14	3	369	379	2000	FUNCTIONAL ECOLOGY
16	Alca torda	11	Thaxter, C. B.; Wanless, S.; Daunt, F.; Harris, M. P.; Benvenuti, S.; Watanuki, Y.; Gremillet, D.; Hamer, K. C.				Daunt, Francis/K-6688-2012; Wanless, Sarah/K-2338-2012	Wanless, Sarah/0000-0002-2788-4606			Influence of wing loading on the trade-off between pursuit-diving and flight in common guillemots and razorbills										Species of bird that use their wings for underwater propulsion are thought to face evolutionary trade-offs between flight and diving, leading to the prediction that species with different wing areas relative to body mass (i.e. different wing loadings) also differ in the relative importance of flight and diving activity during foraging trips. We tested this hypothesis for two similarly sized speci…	213	7	1018	1025	2010	JOURNAL OF EXPERIMENTAL BIOLOGY
17	Alca torda	10	Benjamins, Steven; Kulka, David W.; Lawson, Jack								Incidental catch of seabirds in Newfoundland and Labrador gillnet fisheries, 2001-2003.										Incidental catch of seabirds in gillnet fisheries in Newfoundland and Labrador, Canada, has been identified in several fisheries, but defendable estimates are unavailable. Despite reduced fishing effort in several fisheries, concern remains that catch rates might negatively impact local seabird populations. Based on data sources within Fisheries and Oceans Canada (St. John's, Canada), total numbe…	45	1	136	147	2003	ARCHIVES OF ENVIRONMENTAL CONTAMINATION AND TOXICOLOGY
18	Alca torda	9	WAGNER, RH								MATE GUARDING BY MONOGAMOUS FEMALE RAZORBILLS											44	3	533	538	1992	ANIMAL BEHAVIOUR
19	Alca torda	6	HARRISON, NM; WEBB, A; LEAPER, GM								PATTERNS IN SEABIRD DISTRIBUTION WEST OF SCOTLAND										1. The distribution of seabirds west of Scotland was studied relative to water masses in August 1988. Surface salinity was used to indicate the ship's position relative to the water masses described in the literature. Comparisons were made between seabird densities in Inshore Water, the Northern Coastal Current, the Southern Coastal Current and Atlantic/Hebridean Water.2. Seabird density varied w…	4	1	21	30	1994	AQUATIC CONSERVATION-MARINE AND FRESHWATER ECOSYSTEMS
20	Alca torda	6	MURRAY, S; WANLESS, S; HARRIS, MP				Wanless, Sarah/K-2338-2012	Wanless, Sarah/0000-0002-2788-4606			THE EFFECTS OF FIXED SALMON SALMO-SALAR NETS ON GUILLEMOT URIA-AALGE AND RAZORBILL ALCA-TORDA IN NORTHEAST SCOTLAND IN 1992										Guillemots Uria aalge and razorbills Alca torda were the main seabird species killed in salmon Salmo salar bag nets in northeast Scotland in 1992, with guillemots outnumbering razorbills two- to three-fold. Sexually immature birds were more likely to become entangled compared with breeding adults, probably because they spend more time on the sea close inshore or have not learned to avoid nets. Th…	70	3	251	256	1994	BIOLOGICAL CONSERVATION
21	Alca torda	3	Lahoz-Monfort, Jose J.; Morgan, Byron J. T.; Harris, Michael P.; Wanless, Sarah; Freeman, Stephen N.				Freeman, Stephen/E-7267-2012; Wanless, Sarah/K-2338-2012	Wanless, Sarah/0000-0002-2788-4606			A capture-recapture model for exploring multi-species synchrony in survival										1. Although recent decades have seen much development of statistical methods to estimate demographical parameters such as reproduction, and survival and migration probabilities, the focus is usually the estimation of parameters for individual species. This is despite the fact that several species may live in close proximity, sometimes competing for the same resources. There is therefore a great n…	424		219	227	2011	MARINE ECOLOGY PROGRESS SERIES
22	Alca torda	2	McSorley, Claire A.; Dean, Ben J.; Webb, Andy; Reid, James B.						Boere, G.C.; Galbraith, C.A.; Stroud, D.A.		Extending the boundaries of seabird breeding colony protected areas into the marine environment.													752	753	2006	Waterbirds around the world: a global overview of the conservation, management and research of the world's waterbird flyways. International conference on waterbirds held in Edinburgh in April 2004.
23	Alca torda	1	Thompson, K.R.; Walsh, P.M.								Population trends and breeding success of cliff-nesting seabirds in Orkney, 1976-98.											2	41367	103	132	2000	Atlantic Seabirds
24	Alca torda	0	Birkhead, T.R.; Hatchwell, B.J.								Developing methods to estimate razorbill Alca torda survival on Skomer.											383		1	11, 1-14, 1-11	2000	CCW Contract Science Report
25	Alca torda	0	Birkhead, T.R.; Hatchwell, B.J.								Razorbill Alca torda survival and breeding on Skomer, 2000-2003.										1. The initial aim of the study was to estimate population parameters for the Razorbill Alca torda on Skomer Island, Wales. We monitored adult survival, juvenile survival and breeding success each year between 2000 and 2003 inclusive. 2. Estimates of these population parameters were seriously disrupted by the presence of a pair of ravens Corvus corax that specialised in taking eggs and eggs from …	633		i	iii, 1-64	2004	CCW Contract Science Report
26	Alca torda	0	Dare, P.J.								Seabird movements and abundance off Covehithe, Suffolk, 1994-96. 1. Fulmar, gannet, kittiwake, guillemot and razorbill.											46		16	36	1998	Suffolk Birds
27	Alca torda	0	GREENWOOD, JJD								THE LAYING-DATE OF RAZORBILLS ALCA-TORDA											125	1	108	108	1983	IBIS
28	Alca torda	0	Harris, M.P.; Wanless, S.								Inland nesting by razorbills.											19	2	121	122	1997	Scottish Birds
29	Alca torda	0	Heubeck, M.; Aarvak, T.; Isaksen, K.; Johnsen, A.; Petersen, I.K.; Anker-Nilssen, T.								Mass mortality of adult razorbills Alca torda in the Skagerrak and North Sea area, autumn 2007.										An abnormal movement of auks occurred in the eastern Skagerrak in the third week of September 2007. Large numbers of Razorbills Alca torda were reported along the coasts of southeast Norway and western Sweden, many thousands entered Oslofjorden (Norway), and their migration past the northern tip of Denmark into the Kattegat began a month earlier than normal. This preceded heavy mortality of the s…	24		11	32	2011	Seabird
30	Alca torda	0	Howey, David H.								Fluctuations in the numbers of auks recorded off the Sussex coast.											60		241	247	2008	Sussex Bird Report
31	Alca torda	0	Weir, D.; Kitchener, A.; McGowan, R.; Kinder, A.; Zonfrillo, B.								Origins, population structure, pathology and diet of samples of diver and auk casualties of the Sea Empress oil spill.											242		1	39	1997	CCW Contract Science Report
1	Alcedo atthis	15	RAVEN, P								THE SIZE OF MINNOW PREY IN THE DIET OF YOUNG KINGFISHERS ALCEDO-ATTHIS					1						33		6	11	1986	BIRD STUDY
2	Alcedo atthis	8	Reynolds, SJ; Hinge, MDC								Foods brought to the nest by breeding Kingfishers Alcedo atthis in the New Forest of southern England					1					Very few studies have addressed the breeding ecology of the Kingfisher, especially in Britain. The fish diet of Kingfishers was studied from 3 watersheds in the New Forest, Hampshire using analysis of regurgitated prey remains collected from nest tunnels and chambers. Diagnostic bones from each of 5 prey species were selected to identify prey species represented in the remains. From reference mat…	43		96	102	1996	BIRD STUDY
3	Alcedo atthis	0	Bantock, Tristan								Common kingfisher catching and attempting to eat a shrew.											101	9	497	497	2008	British Birds
4	Alcedo atthis	0	McCanch, Norman								Common kingfisher mobbing great bittern.											96	1	44	44	2003	British Birds
5	Alcedo atthis	0	Mitcham, Terry								Common kingfisher eating newts.											99	10	533	533	2006	British Birds
6	Alcedo atthis	0	Rewcastle, Lindsay; Bowey, Keith; Westerberg, Stephen								Observed winter feeding rate of common kingfisher.											90	9	362	362	1997	British Birds
7	Alcedo atthis	0	Skillen, Brian S.								Kingfisher on the River Kelvin in 1998.											23	4	70	71	1999	Glasgow Naturalist
8	Alcedo atthis	0	Skillen, Brian S.								Update on kingfishers on the River Kelvin.											23	1	62	62	1996	Glasgow Naturalist
9	Alcedo atthis	0	Sparks, John								Grey heron preying on rabbit and common kingfisher.											95	2	85	85	2002	British Birds
10	Alcedo atthis	0	Webley, John								Common kingfishers taking great crested newts.											102	5	281	282	2009	British Birds
1	Alectoris rufa	113	GREEN, RE								THE FEEDING ECOLOGY AND SURVIVAL OF PARTRIDGE CHICKS (ALECTORIS-RUFA AND PERDIX-PERDIX) ON ARABLE FARMLAND IN EAST ANGLIA											39	4	337	346	2012	ENVIRONMENTAL CONSERVATION
2	Alectoris rufa	34	Reynolds, Jonathan C.; Tapper, Stephen C.								The ecology of the red fox Vulpes vulpes in relation to small game in rural southern England										Reynolds, J.C. & Tapper, S.C. 1995: The ecology of the red fox Vulpes vulpes in relation to small game in rural southern England. - Wildl. Biol. 1: 105-119. Diet, population density, dispersion, and productivity of red foxes were investigated in an 11 km(2) area of mixed agriculture representative of much of lowland rural Britain, where medium-sized animals (adult weight 0.3-3.5 kg) were abundant…	152	3	530	542	2010	IBIS
3	Alectoris rufa	30	RANDS, MRW								THE EFFECT OF NEST SITE SELECTION ON NEST PREDATION IN GREY PARTRIDGE PERDIX-PERDIX AND RED-LEGGED PARTRIDGE ALECTORIS-RUFA											5	4			2010	PLOS ONE
4	Alectoris rufa	29	RANDS, MRW								HEDGEROW MANAGEMENT FOR THE CONSERVATION OF PARTRIDGES PERDIX-PERDIX AND ALECTORIS-RUFA											44	5	972	982	2007	JOURNAL OF APPLIED ECOLOGY
5	Alectoris rufa	27	GREEN, RE								DOUBLE NESTING OF THE RED-LEGGED PARTRIDGE ALECTORIS-RUFA											35	4	335	U101	2006	AVIAN PATHOLOGY
6	Alectoris rufa	24	GREEN, RE								SPRING DISPERSAL AND AGONISTIC BEHAVIOR OF THE RED-LEGGED PARTRIDGE (ALECTORIS-RUFA)											51	4	248	253	2005	EUROPEAN JOURNAL OF WILDLIFE RESEARCH
7	Alectoris rufa	15	Aebischer, N.J.; Blake, K.A.; Boatman, N.D.								Field margins as habitats for game.											133	4	466	473	2002	OECOLOGIA
8	Alectoris rufa	11	Tompkins, DM; Parish, DMB; Hudson, PJ								Parasite-mediated competition among red-legged partridges and other lowland gamebirds										Evidence suggests that the transmission of shared parasites from ring-necked pheasants (Phasianus colchicus), specifically the caecal nematode Heterakis gallinarum, may be I cause of the decline of the gray partridge (Perdix perdix) in the United Kingdom (UK) over the past 50 years. It may also be a factor preventing the recovery of the remaining wild gray partridge populations. Trials were under…	89	41306	41	52	2002	AGRICULTURE ECOSYSTEMS & ENVIRONMENT
9	Alectoris rufa	8	RANDS, MRW								RECRUITMENT OF GRAY AND RED-LEGGED PARTRIDGES (PERDIX-PERDIX AND ALECTORIS-RUFA) IN RELATION TO POPULATION-DENSITY AND HABITAT					3						72	3	285	297	1999	AGRICULTURE ECOSYSTEMS & ENVIRONMENT
10	Alectoris rufa	7	Aebischer, Nicholas J.; Ewald, Julie A.								Grey Partridge Perdix perdix in the UK: recovery status, set-aside and shooting										The Grey Partridge Perdix perdix is a European Species of Conservation Concern and a priority species under the UK Biodiversity Action Plan. The Game & Wildlife Conservation Trust (GWCT) launched a major programme to help partridge recovery in the UK, built on the GWCT's Partridge Count Scheme (PCS) and including a demonstration site from 2002. We contrast the national picture of no population ch…	15	4	563	574	1998	Gibier Faune Sauvage
11	Alectoris rufa	7	Boatman, N.D.; Brockless, M.H.								The Allerton Project: farmland management for partridges (Perdix perdix, Alectoris rufa) and pheasants (Phasianus colchicus).											91	8	330	330	1998	British Birds
12	Alectoris rufa	6	GREEN, RE; RANDS, MRW; MOREBY, SJ								SPECIES-DIFFERENCES IN DIET AND THE DEVELOPMENT OF SEED DIGESTION IN PARTRIDGE CHICKS PERDIX-PERDIX AND ALECTORIS-RUFA											138	25	624	625	1996	VETERINARY RECORD
13	Alectoris rufa	3	Allen, David S.; Feare, Chris J.						Thompson, D.B.A.; Redpath, S.M.; Fielding, A.H.; Marquiss, M.; Galbraith, C.A.		Birds of prey and lowland gamebird management.											38	1	50	62	1994	PEDOBIOLOGIA
14	Alectoris rufa	3	Langton, SD; Aebischer, NJ; Robertson, PA				Robertson, Peter/H-1614-2013	Robertson, Peter/0000-0003-1567-8677			The estimation of density dependence using census data from several sites										The discussion of density dependence in the ecological literature has tended to concentrate on significance testing, whereas estimation is often of more importance. In this paper we use simulation to investigate the bias and precision of a number of methods for estimating density dependence using census data from several sites. The estimation methods examined were a modification of an existing ma…	40	41365	155	178	1992	AGRICULTURE ECOSYSTEMS & ENVIRONMENT
15	Alectoris rufa	3	Sage, RB; Parish, DMB; Woodburn, MIA; Thompson, PGL								Songbirds using crops planted on farmland as cover for game birds										We counted songbirds in crops planted on shooting estates specifically for game management purposes on farmland in Britain and elsewhere in Europe. Winter game crops provide cover and feed areas for pheasants Phasianus colchicus and red-legged partridge Alectoris rufa, while summer game crops are designed to provide brood-rearing cover for these species. In central and southern England, 30 plots …	13	1	115	120	1994	ENVIRONMENTAL TOXICOLOGY AND CHEMISTRY
16	Alectoris rufa	0	Brazier, David								Common starlings and red-legged partridges collecting insects from parked vehicles.											201	DEC	541	555	1983	JOURNAL OF ZOOLOGY
1	Alopochen aegyptiaca	0	Warren, John E.								Egyptian geese eating New Zealand pigmyweed.											101	4	200	200	2008	British Birds
1	Anas acuta	1	de la Hey, Daniel Charles								The importance of birds in the diet of otter Lutra lutra on Shapwick Heath.										This study investigates the importance of avian species in the diet of Shapwick Heath's otter population. The frequency occurrence of prey items was recorded from spraints collected between July 2006 and January 2007. Bird feathers extracted from otter spraints were investigated under a microscope. Where possible, feathers were identified to species level. The presence of fish scales in spraints …	1	2	143	147	2008	Bioscience Horizons
1	Anas clypeata	0	Banks, A.N.; Austin, G.E.; Rehfisch, M.M.								South west London waterbodies SPA wildfowl population analysis.											361		1	73	2006	BTO Research Report
2	Anas clypeata	0	Briggs, Brian D. J.; Hill, David A.; Gosler, Andrew G.								Habitat selection and waterbody-complex use by wintering Gadwall and Shoveler in South West London: Implications for the designation and management of multi-site protected areas										The degree to which Special Protection Area (SPA) designation reflects ecological reality is of critical importance to wildlife conservation. We examined whether the designation of a large SPA designated to conserve wintering waterfowl (chiefly Gadwall Anas strepera and Northern Shoveler Anas clypeata), reflected the birds' habitat preferences and their use of the SPA in the context of the broade…	20	4	200	210	2012	JOURNAL FOR NATURE CONSERVATION
3	Anas clypeata	0	KIRBY, JS; MITCHELL, C								DISTRIBUTION AND STATUS OF WINTERING SHOVELERS ANAS-CLYPEATA IN GREAT-BRITAIN (VOL 40, PG 170, 1993)					1						41		U80	U80	1994	BIRD STUDY
4	Anas clypeata	0	KIRKBY, JS; MITCHELL, C								DISTRIBUTION AND STATUS OF WINTERING SHOVELERS ANAS CLYPEATA IN GREAT-BRITAIN					3					The distribution and status of Shovelers using British wetlands in autumn and winter was examined using ringing recoveries and National Waterfowl Count data. Maximum counts have been around 8500 and suggest a total population of c. 10 000. Some of these birds originate from north-west continental Europe, eastern Scandinavia and the Western former USSR, whilst others originate from British breedin…	40		170	180	1993	BIRD STUDY
1	Anas crecca	13	Burton, NHK; Rehfisch, MM; Clark, NA								Impacts of disturbance from construction work on the densities and feeding behavior of waterbirds using the intertidal mudflats of Cardiff Bay, UK										The impact of disturbance from construction work around Cardiff Bay, south Wales, on the densities and feeding behavior of seven waterbird species was studied over an 11-year period. Construction of a barrage across the mouth of the bay has subsequently resulted in its impoundment; other major works included the construction of a bridge carrying a divided highway. Construction work disturbance si…	257		533	538	2002	JOURNAL OF ZOOLOGY
2	Anas crecca	7	Guillemain, Matthieu; Hearn, Richard; King, Roy; Gauthier-Clerc, Michel; Simon, Geraldine; Caizergues, Alain								Differential migration of the sexes cannot be explained by the body size hypothesis in Teal										The "body size hypothesis" predicts that if individuals of a population migrate different distances from the breeding to the wintering grounds, the distance should be related to the differential ability to cope with adverse conditions, with larger individuals wintering further north. Data collected over a 40-year period in Essex, UK and the Camargue, southern France, revealed that the average bod…	150	3	685	689	2009	JOURNAL OF ORNITHOLOGY
3	Anas crecca	6	FOX, AD				Fox, Anthony/I-7465-2013				THE BREEDING TEAL (ANAS-CRECCA) OF A COASTAL RAISED MIRE IN CENTRAL WEST WALES					1						33		18	23	1986	BIRD STUDY
4	Anas crecca	5	Guillemain, Matthieu; Devineau, Olivier; Gauthier-Clerc, Michel; Hearn, Richard; King, Roy; Simon, Geraldine; Grantham, Mark								Changes in ring recovery rates over the last 50 years: shall we continue to ring ducks?										Although knowledge of ring recovery rate is of crucial importance to establish demographic parameters, such as survival probability, this information is generally unknown for the dabbling ducks. The almost single existing value from the North American Mallard (Anas platyrhynchos) is thus generally applied to other species or geographic areas, even though this assumption may be strongly misleading…	152	1	55	61	2011	JOURNAL OF ORNITHOLOGY
5	Anas crecca	1	Green, Andy J.; Georgiev, Boyko B.; Brochet, Anne-Laure; Gauthier-Clerc, Michel; Fritz, Herve; Guillemain, Matthieu				Green, Andy/A-5189-2008; CSIC, EBD Donana/C-4157-2011; Georgiev, Boyko/A-2223-2013	Green, Andy/0000-0002-1268-4951; CSIC, EBD Donana/0000-0003-4318-6602;			Determinants of the prevalence of the cloacal cestode Cloacotaenia megalops in teal wintering in the French Camargue										Eurasian teal Anas crecca (n = 46,581) were inspected during ringing operations for the presence of the hymenolepidid cloacal cestode Cloacotaenia megalops between 1954 and 1971 while wintering in the Camargue, Southern France. These birds become infected when ingesting seed shrimps (Ostracoda) that act as intermediate hosts, largely while on migration across Western Europe. The prevalence ranged…	57	2	275	281	2011	EUROPEAN JOURNAL OF WILDLIFE RESEARCH
6	Anas crecca	0	Foggitt, Graham; Foggitt, Anna								White-tailed eagle catching Eurasian teal in flight.											100	10	624	624	2007	British Birds
7	Anas crecca	0	McCanch, Norman								A pair of Eurasian Teals diving in search of food.											105	4	221	221	2012	British Birds
8	Anas crecca	0	Stronach, Peter; Cooper, Joanne								Snowy Owl pellet containing Eurasian Teal.											103	6	360	361	2010	British Birds
1	Anas penelope	47	Percival, SM; Sutherland, WJ; Evans, PR				Sutherland, William/B-1291-2013				A spatial depletion model of the responses of grazing wildfowl to the availability of intertidal vegetation										1. This paper describes the development of a spatial depletion model to predict the distribution and abundance of grazing brent geese (Branta bernicla) and wigeon (Anas penelope) in response to changes in the availability of their food on the intertidal mudflats of the Lindisfarne National Nature Reserve, north-east England.2. The model incorporated the numbers of the two grazers, their feeding r…	33	5	979	992	1996	JOURNAL OF APPLIED ECOLOGY
2	Anas penelope	40	Percival, SM; Evans, PR								Brent Geese Branta bernicla and Zostera; Factors affecting the exploitation of a seasonally declining food resource										Brent Geese Branta bernicla wintering at Lindisfarne, northeastern England, fed almost exclusively on intertidal habitats. Their main food supply was two species of Eelgrass Zostera noltii and Zostera angustifolia. Although abundant when the birds arrived in September, this Zostera was rapidly depleted during the period October-December. Brent Goose food intake rate declined with the decreasing f…	139	1	121	128	1997	IBIS
3	Anas penelope	35	Percival, SM; Sutherland, WJ; Evans, PR				Sutherland, William/B-1291-2013				Intertidal habitat loss and wildfowl numbers: applications of a spatial depletion model										1. A spatial depletion model of the responses of grazing wildfowl to the availability of intertidal vegetation at Lindisfarne National Nature reserve, north-east England, was used to investigate the capacity of the site's beds of Zostera and other intertidal vegetation to support brent geese Branta bernicla hrota and wigeon Anas penelope.2. Recent total winter counts of brent geese and wigeon wer…	35	1	57	63	1998	JOURNAL OF APPLIED ECOLOGY
4	Anas penelope	23	MAYHEW, P; HOUSTON, D								FEEDING SITE SELECTION BY WIGEON ANAS-PENELOPE IN RELATION TO WATER											131	1	1	8	1989	IBIS
5	Anas penelope	15	Guillemain, M; Caldow, RWG; Hodder, KH; Goss-Custard, JD								Increased vigilance of paired males in sexually dimorphic species: distinguishing between alternative explanations in wintering Eurasian wigeon										In animal pairs, males are often more vigilant than females. This is generally assumed to result from mate guarding (either against predators or other males). However, when males have conspicuous secondary sexual characteristics, they could be constrained to be more vigilant because of a higher predation risk than females. We attempted to distinguish between the "male constraint hypothesis" and t…	14	5	724	729	2003	BEHAVIORAL ECOLOGY
6	Anas penelope	12	OWEN, M; MITCHELL, C								MOVEMENTS AND MIGRATIONS OF WIGEON ANAS-PENELOPE WINTERING IN BRITAIN AND IRELAND					1						35		47	59	1988	BIRD STUDY
7	Anas penelope	8	CADWALLA.DA; MORLEY, JV								SHEEP GRAZING PREFERENCES ON A SALTINGS PASTURE AND THEIR SIGNIFICANCE FOR WIGEON (ANAS-PENELOPE L) CONSERVATION											150	3	685	689	2009	JOURNAL OF ORNITHOLOGY
8	Anas penelope	7	CADWALLA.DA; MORLEY, JV								FURTHER EXPERIMENTS ON MANAGEMENT OF SALTINGS PASTURE FOR WIGEON (ANAS-PENELOPE L) CONSERVATION AT BRIDGWATER-BAY-NATIONAL-NATURE-RESERVE, SOMERSET											123	4	438	449	1981	IBIS
9	Anas penelope	7	Mathers, RG; Montgomery, WI								Behaviour of Brent geese Branta bernicla hrota and wigeon Anas penelope feeding on intertidal Zostera spp										Mixed flocks of pale-bellied Brent geese (Branta bernicla hrota) and wigeon (Anas penelope L.) feeding on intertidal Zostera spp were studied during October 1993 with respect to tidal position, feeding method and duration, and competitive: interactions within and between species. Owing to many disturbance incidents affecting the use of the site by wildfowl, only complete data on flow tides were p…	55		43	51	2008	BIRD STUDY
10	Anas penelope	7	VONKANEL, A								WINTER FEEDING ECOLOGY OF WIGEON ANAS-PENELOPE AT THE OUSE WASHES, ENGLAND											96B	3	159	167	1996	BIOLOGY AND ENVIRONMENT-PROCEEDINGS OF THE ROYAL IRISH ACADEMY
11	Anas penelope	6	Mitchell, Carl; Fox, Anthony D.; Harradine, John; Clausager, I. B.				Fox, Anthony/I-7465-2013				Measures of annual breeding success amongst Eurasian Wigeon Anas penelope					1					Capsule Inferences are drawn on the basis of first-winter young:adult ratios.Aim To obtain the most error- and bias-free index of annual reproductive success for the species based on existing data.Methods We compared age and sex ratios amongst shot birds in Denmark and the UK with those amongst samples of birds caught for ringing purposes and field observations in the UK.Results The annual propor…	11	2	461	&	1974	JOURNAL OF APPLIED ECOLOGY
12	Anas penelope	5	Mitchell, C								Re-mating in migratory Wigeon Anas penelope										This note describes re-mating in migratory Wigeon Anas penelope in subsequent winters. Three pairs, out of five cases where both male and female partners returned to the study area, reformed in the following winter.	141	1	80	84	1999	IBIS
13	Anas penelope	4	Mayhew, P; Houston, D								Effects of winter and early spring grazing by Wigeon Anas penelope on their food supply										Wigeon Anas penelope selectively grazed small patches of grassland near water. Their grazing activity affected the vegetation on which they fed, resulting in a 52% increase in leaf production over the winter and, at the end of winter, 4.75% higher protein levels compared with plants which were ungrazed. These responses of the plants were caused by defoliation, which stimulated growth, and not a f…	4	2	101	121	1986	JOURNAL OF ENVIRONMENTAL RADIOACTIVITY
14	Anas penelope	3	Burton, NHK; Musgrove, AJ; Rehfisch, MM								Tidal variation in numbers of waterbirds: how frequently should birds be counted to detect change and do low tide counts provide a realistic average?					1					Capsule Variation in numbers needs to be assessed at both site- and species-specific levels, but low tide counts are representative of average usage in most cases.Aims To determine whether the numbers of waterbirds using six intertidal sites changed across the tidal cycle, how frequently counts were needed to detect change and whether low tide counts were representative of the average numbers usi…	51		48	57	2004	BIRD STUDY
15	Anas penelope	3	Mayhew, Peter W.; Houston, David C.								Feeding behaviour of wigeon Anas penelope on variable grassland swards.										Wigeon in winter have a specialised grazing behaviour which involves repeatedly returning to the same feeding areas of short grassland. Two experiments are described which examined their behavioural adaptations to this type of grazing. A study on captive birds showed but they exhibited highest peck rates on grass of 30 mm height and peck rates declined on both taller and shorter grassland. Wild b…	49		181	185	1999	Wildfowl
16	Anas penelope	1	Portugal, Steven J.; Guillemain, Matthieu								Vigilance patterns of wintering Eurasian Wigeon: female benefits from male low-cost behaviour										Increased vigilance in male animals has been attributed to mate guarding (male investment hypothesis), to secondary sexual characteristics increasing predation risk (male constraint hypothesis) or for the benefit to the female (female benefits hypothesis). We studied Eurasian Wigeon (Anas penelope) while they grazed on dry land, a 'risky' foraging situation, at two points during the winter period…	45		18	34	1998	BIRD STUDY
17	Anas penelope	0	Court, I.R.; Irving, P.V.; Slator, D.; Smith, J.; Straker, C.								Status of Eurasian wigeon in the Yorkshire Dales National Park in 2003 and a review of recent historical breeding records.											129	1049	81	84	2004	Naturalist (Sheffield)
18	Anas penelope	0	Elkins, Norman								Eurasian wigeons feeding on bird droppings.											89	10	451	451	1996	British Birds
19	Anas penelope	0	Kalejta-Summers, Bozena								Long-term changes in numbers and distribution of wintering ducks and swans in the Moray Firth, Scotland, 1985-2002.										Counts of ducks and swans in the Moray Firth between 1985 and 2002 were analysed to assess changes in their numbers and distributions. The average count for all ducks combined exceeded 20,000 in all winters. Wigeon Anas penelope was the most abundant,platyrhynchos and Teal A. crecca. The majority of species species, followed by Mallard A. peaked in December and January, except Wigeon, which peake…	56		94	112	2006	Wildfowl
20	Anas penelope	0	Knox, Alan G.								The first foreign recovery of a British-ringed bird and the first single-species ringing projects.											26	1	79	81	2011	Ringing & Migration
21	Anas penelope	0	Pratt, Norman								Wintering wildfowl in the Lower Avon: conservation aspects of recent counts.											1997		154	158	1999	Hampshire Bird Report
1	Anas platyrhynchos	208	Cunningham, EJA; Russell, AF				Cunningham, Emma/I-9190-2012				Egg investment is influenced by male attractiveness in the mallard										Why females prefer to copulate with particular males is a contentious issue. Attention is currently focused on whether females choose males on the basis of their genetic quality, in order to produce more viable offspring(1). Support for this hypothesis in birds has come from studies showing that preferred males tend to father offspring of better condition or with increased survivorship(2-8). Befo…	404	6773	74	77	2000	NATURE
2	Anas platyrhynchos	93	OWEN, M; COOK, WA								VARIATIONS IN BODY-WEIGHT, WING LENGTH AND CONDITION OF MALLARD ANAS-PLATYRHYNCHOS-PLATYRHYNCHOS AND THEIR RELATIONSHIP TO ENVIRONMENTAL CHANGES											183	NOV	377	395	1977	JOURNAL OF ZOOLOGY
3	Anas platyrhynchos	58	LENDREM, DW				Lendrem, Dennis/H-2590-2013	Lendrem, Dennis/0000-0001-6268-5509			SLEEPING AND VIGILANCE IN BIRDS .1. FIELD OBSERVATIONS OF THE MALLARD (ANAS-PLATYRHYNCHOS)											129	2	159	167	1987	IBIS
4	Anas platyrhynchos	56	HILL, D; WRIGHT, R; STREET, M								SURVIVAL OF MALLARD DUCKLINGS ANAS-PLATYRHYNCHOS AND COMPETITION WITH FISH FOR INVERTEBRATES ON A FLOODED GRAVEL QUARRY IN ENGLAND											31	MAY	532	538	1983	ANIMAL BEHAVIOUR
5	Anas platyrhynchos	39	HILL, DA								POPULATION REGULATION IN THE MALLARD (ANAS-PLATYRHYNCHOS)											53	1	191	202	1984	JOURNAL OF ANIMAL ECOLOGY
6	Anas platyrhynchos	25	Buckton, ST; Ormerod, SJ				Ormerod, Steve/A-4326-2010				Use of a new standardized habitat survey for assessing the habitat preferences and distribution of upland river birds					3					Assessments of the habitat requirements of river birds are central to understanding their distribution and abundance. Here, we make an initial appraisal of the suitability for this purpose of a new standardized method of river habitat survey (RHS) developed by the Environment Agency (EA). We carried out RHS and recorded the presence of five common birds along 74 upland Welsh streams. RHS provided…	44		327	337	1997	BIRD STUDY
7	Anas platyrhynchos	21	BIRKHEAD, M								VARIATION IN EGG QUALITY AND COMPOSITION IN THE MALLARD ANAS-PLATYRHYNCHOS											127	4	467	475	1985	IBIS
8	Anas platyrhynchos	19	HILL, DA								LAYING DATE, CLUTCH SIZE AND EGG SIZE OF THE MALLARD ANAS-PLATYRHYNCHOS AND TUFTED DUCK AYTHYA-FULIGULA											24	41335	153	167	2000	DEVELOPMENTAL AND COMPARATIVE IMMUNOLOGY
9	Anas platyrhynchos	17	WEIDMANN, U								PLUMAGE QUALITY AND MATE CHOICE IN MALLARDS (ANAS-PLATYRHYNCHOS)					41306						38	6	1197	1207	2001	JOURNAL OF APPLIED ECOLOGY
10	Anas platyrhynchos	15	Cunningham, EJA				Cunningham, Emma/I-9190-2012				Female mate preferences and subsequent resistance to copulation in the mallard										In the majority of socially monogamous bird species, females solicit or accept copulations from males other than their partner. Females may gain direct benefits from extrapair males, such as greater access to resources, or indirect genetic benefits that will influence the future success of their offspring. However, one group of birds appears to be the exception to this general rule; in the wildfo…	122		195	230	1992	BEHAVIOUR
11	Anas platyrhynchos	12	GOODBURN, SF								MATE GUARDING IN THE MALLARD ANAS-PLATYRHYNCHOS											111	1	1	12	1995	COMPARATIVE BIOCHEMISTRY AND PHYSIOLOGY C-PHARMACOLOGY TOXICOLOGY & ENDOCRINOLOGY
12	Anas platyrhynchos	11	Speake, BK; Surai, PF; Bortolotti, GR								Fatty acid profiles of yolk lipids of five species of wild ducks (Anatidae) differing in dietary preference					4					The fatty acid compositions of yolk lipids of eggs collected in the wild from five species of ducks (Anatidae) showing a range of dietary preferences, the king cider Somateria spectabilis, the lesser scaup Aythya affinis, the mallard Anas platyrhynchos, the green-winged teal Anas crecca and the gadwall Anas streperi, are reported. For all five species, the fatty acid profiles conformed to a simil…	15	4	261	265	1984	ORNIS SCANDINAVICA
13	Anas platyrhynchos	10	SIMMONS, KEL; WEIDMANN, U								DIRECTIONAL BIAS AS A COMPONENT OF SOCIAL-BEHAVIOR WITH SPECIAL REFERENCE TO MALLARD, ANAS-PLATYRHYNCHOS											170	MAY	49	62	1973	JOURNAL OF ZOOLOGY
14	Anas platyrhynchos	7	CLARK, NA; VARLEY, TA; EVANS, J; WRIGHT, GA								BREEDING SUCCESS OF MALLARY ANAS-PLATYRHYNCHOS AT LOCH-LEVEN-NATIONAL-NATURE-RESERVE					2						76	2	187	195	2003	PHYSIOLOGICAL AND BIOCHEMICAL ZOOLOGY
15	Anas platyrhynchos	5	Guillemain, Matthieu; Devineau, Olivier; Gauthier-Clerc, Michel; Hearn, Richard; King, Roy; Simon, Geraldine; Grantham, Mark								Changes in ring recovery rates over the last 50 years: shall we continue to ring ducks?										Although knowledge of ring recovery rate is of crucial importance to establish demographic parameters, such as survival probability, this information is generally unknown for the dabbling ducks. The almost single existing value from the North American Mallard (Anas platyrhynchos) is thus generally applied to other species or geographic areas, even though this assumption may be strongly misleading…	152	1	55	61	2011	JOURNAL OF ORNITHOLOGY
16	Anas platyrhynchos	3	Robinson, JA; Aldridge, NS; Wright, L; Culzac, LG								Invertebrate food supply and breeding success of Mallards Anas platyrhynchos at flooded gravel quarries in southern Britain										Reproductive parameters of Mallard Anas platyrhynchos were investigated in relation to vegetative development, physical characteristics and invertebrate food abundance of a complex of flooded gravel quarries in southern Britain. Breeding pair density over the study area was particularly high with 2.2 pairs km(-1) of shoreline. Across all lakes breeding success was limited to an average of 0.9 duc…	91	1	3	9	2003	ARDEA
17	Anas platyrhynchos	2	Kirby, J.S.; Bell, M.C.								Surveillance of non-breeding waterfowl populations methods to trigger conservation action.											78	3	447	455	2005	PHYSIOLOGICAL AND BIOCHEMICAL ZOOLOGY
18	Anas platyrhynchos	2	Mason, Chris F.; Macdonald, Sheila M.								Numbers of wintering waterbirds on rivers in eastern England.										Waterbirds were counted on three occasions during the winter of 1999-2000 on 22 1-km reaches of river in north Essex and south Suffolk, eastern England. Fourteen species were recorded but only five were frequent: Little Grebe (Tachybaptus ruficollis), Mute Swan (Cygnus olor), Mallard (Anas platyrhynchos), Moorhen (Gallinula chloropus), and Coot (Fulica atra). Mallard was the most numerous species…	98	7	377	377	2005	British Birds
19	Anas platyrhynchos	1	de la Hey, Daniel Charles								The importance of birds in the diet of otter Lutra lutra on Shapwick Heath.										This study investigates the importance of avian species in the diet of Shapwick Heath's otter population. The frequency occurrence of prey items was recorded from spraints collected between July 2006 and January 2007. Bird feathers extracted from otter spraints were investigated under a microscope. Where possible, feathers were identified to species level. The presence of fish scales in spraints …	1	2	143	147	2008	Bioscience Horizons
20	Anas platyrhynchos	1	Harris, Alan								Mallard diving for fish.											51		215	219	2000	Wildfowl
21	Anas platyrhynchos	1	Mason, CF; MacDonald, SM								The bird assemblage of coastal borrowdykes in relation to habitat features										The birds along twenty 500 in lengths of coastal borrowdyke (water-filled ditches left when clay is extracted to make a sea wall) in eastern England were counted in spring 2004 and occurrence related to features of habitat. A total of 45 species was recorded with species richness ranging from 5-21. The most widespread species were little grebe Tachybaptus ruficollis, mute swan Cygnus olor, mallar…	54	3	293	300	2005	FOLIA ZOOLOGICA
22	Anas platyrhynchos	0	Craik, J.C.A.								Mixed clutches at seabird colonies in west Scotland 1996-2009.										In counts of gulls, terns, wildfowl and waders breeding on about 100 small islands along the mainland coast of west Scotland during 1996[long dash]2009, 123 clutches containing the eggs of two species ('mixed clutches') were found among 69,775 clutches of 20 species (0.18%). The annual percentage varied between 0.09% and 0.33%. Most (89%) mixed clutches contained only one egg of one of the specie…	23		41	52	2010	Seabird
23	Anas platyrhynchos	0	Davies, Colin								Adult mallards repeatedly diving.											93	2	90	90	2000	British Birds
24	Anas platyrhynchos	0	Dougall, Tom								Mallard eating eel.											21	1	49	49	2000	Scottish Birds
25	Anas platyrhynchos	0	McCallum, L.T.								Female mallard attacking grey heron in defence of young.											94	2	88	89	2001	British Birds
26	Anas platyrhynchos	0	Morris, P.I.								Mandarin ducks and mallards diving for acorns.											91	8	327	327	1998	British Birds
27	Anas platyrhynchos	0	Robinson, J.A.; Culzac, L.G.; Aldridge, N.S.								Age-related changes in the habitat use and behaviour of mallard Anas platyrhynchos broods at artificially created lakes in southern Britain.										Diurnal time-activity budgets of Mallard broods were measured at the Cotswold Water, Park and The New Grounds, Slimbridge in spring and summer 2000. During the first month after hatching, ducklings spent 50% of their time feeding. Ducklings spent increasingly less time feeding, more time preening, and were more mobile, as they got older. In the first two weeks after hatching, ducklings spent over…	53		107	118	2002	Wildfowl
28	Anas platyrhynchos	0	Sage, Bryan								Mallards attacking common buzzard.											96	12	654	654	2003	British Birds
1	Anas querquedula	6	Portugal, Steven J.; Isaac, Rhian; Quinton, Kate L.; Reynolds, S. James								Do captive waterfowl alter their behaviour patterns during their flightless period of moult?										Many different behavioural changes have been observed in wild waterfowl during the flightless stage of wing moult with birds frequently becoming inactive and reducing time spent foraging. Increased predation risk, elevated energetic demands of feather re-growth and restriction of foraging opportunities are thought to underlie these changes. By studying captive populations of both a dabbling and a…	151	2	443	448	2010	JOURNAL OF ORNITHOLOGY
1	Anas strepera	2	King, Roy; Fox, Anthony D.				Fox, Anthony/I-7465-2013				Moulting mass dynamics of female Gadwall Anas strepera and male Wigeon A. penelope at Abberton Reservoir, southeast England										Capsule Female Gadwall Anas strepera and male Wigeon A. penelope lost about 18% of body mass during flightless wing moult at Abberton Reservoir, southeast England - slightly greater than that recorded for other dabbling ducks but less than among Pochard Aythya ferina at the same site. Results, while consistent with the 'moult stress' hypothesis, also support the hypothesis that dabbling ducks dep…	59	2	252	254	2012	BIRD STUDY
2	Anas strepera	2	Musgrove, Andrew J.; Austin, Graham E.; Hearn, Richard D.; Holt, Chas A.; Stroud, David A.; Wotton, Simon R.								Overwinter population estimates of British waterbirds.										In total, over 12.5 million waterbirds occur in Britain during the winter. Estimates of the numbers of non-breeding waterbirds visiting Britain are important for the birds' conservation, both for status assessments and for the identification and designation of nationally and internationally important sites. This paper collates data from a wide range of sources, principally for the period 2004/05 …	104	7	364	397	2011	British Birds
3	Anas strepera	0	Banks, A.N.; Austin, G.E.; Rehfisch, M.M.								South west London waterbodies SPA wildfowl population analysis.											361		1	73	2006	BTO Research Report
4	Anas strepera	0	Briggs, Brian D. J.; Hill, David A.; Gosler, Andrew G.								Habitat selection and waterbody-complex use by wintering Gadwall and Shoveler in South West London: Implications for the designation and management of multi-site protected areas										The degree to which Special Protection Area (SPA) designation reflects ecological reality is of critical importance to wildlife conservation. We examined whether the designation of a large SPA designated to conserve wintering waterfowl (chiefly Gadwall Anas strepera and Northern Shoveler Anas clypeata), reflected the birds' habitat preferences and their use of the SPA in the context of the broade…	20	4	200	210	2012	JOURNAL FOR NATURE CONSERVATION
5	Anas strepera	0	Cloyne, John								Exceptional brood of gadwalls.											103	12	730	730	2010	British Birds
1	Anser anser	19	Frederiksen, M; Hearn, RD; Mitchell, C; Sigfusson, A; Swann, RL; Fox, AD				Frederiksen, Morten/A-7542-2008; Fox, Anthony/I-7465-2013	Frederiksen, Morten/0000-0001-5550-0537;			The dynamics of hunted Icelandic goose populations: a reassessment of the evidence										1. Migratory geese are dominant terrestrial herbivores in Arctic and north temperate regions. They are important quarry species and also conflict with agricultural interests through winter foraging. We investigated the dynamics of the populations of greylag Anser anser and pink-footed Anser brachyrhynchus geese that breed in Iceland and winter in Britain.2. We estimated seasonal and annual surviv…	41	2	315	334	2004	JOURNAL OF APPLIED ECOLOGY
2	Anser anser	16	NEWTON, I; KERBES, RH								BREEDING OF GREYLAG GEESE (ANSER-ANSER) ON OUTER HEBRIDES, SCOTLAND											71		1335	1341	2006	ANIMAL BEHAVIOUR
3	Anser anser	12	Speakman, JR; Banks, D				John, Speakman/A-9494-2008				The function of flight formations in Greylag Geese Anser anser; energy saving or orientation?										Twenty five formations of Greylag Geese Anser anser were photographed from immediately below to eliminate perspective distortion, and the lateral and longitudinal displacements of the birds relative to each other were measured, We scaled the photographs and used measurements of bill to tail and wing span made on 15 freshly shot birds to convert the lateral displacements to wing-tip spacings, The …	140	2	280	287	1998	IBIS
4	Anser anser	8	WRIGHT, R; GILES, N								BREEDING SUCCESS OF CANADA AND GREYLAG GEESE BRANTA-CANADENSIS AND ANSER-ANSER ON GRAVEL PITS					1						144	41306	93	103	2007	VETERINARY PARASITOLOGY
5	Anser anser	7	Rehfisch, MM; Austin, GE; Holloway, SJ; Allan, JR; O'Connell, M								An approach to the assessment of change in the numbers of Canada Geese Branta canaidensis and Greylag Geese Anser anser in southern Britain					1					Capsule Population change in geese was assessed using an approach that requires a relatively small sampling effort.Aims During the 1999 breeding season a survey was carried out to determine if the numbers of introduced Canada and re-established Greylag Geese in southern Britain had changed since 1988-91 and whether any change had occurred in areas with previously high or low Canada Goose densitie…	152	3	727	732	2011	JOURNAL OF ORNITHOLOGY
6	Anser anser	6	OWEN, M; SALMON, DG								FERAL GREYLAG GEESE ANSER-ANSER IN BRITAIN AND IRELAND, 1960-86					1						54		343	352	2007	BIRD STUDY
7	Anser anser	6	PATERSON, IW								THE STATUS AND BREEDING DISTRIBUTION OF GREYLAG GEESE ANSER-ANSER IN THE UISTS (SCOTLAND) AND THEIR IMPACT UPON CROFTING AGRICULTURE										The resident population of Greylag Geese on the Scottish islands of North Uist, Benbecula and South Uist forms a significant proportion of the wild British population. The Uists' population has doubled since the 1960s. This led to increased complaints from farmers of significant losses to ripening cereal crops and damage to spring pastures by grazing geese. Grazing intensities were estimated from…	21	2	69	77	2000	Scottish Birds
8	Anser anser	6	Portugal, Steven J.; Isaac, Rhian; Quinton, Kate L.; Reynolds, S. James								Do captive waterfowl alter their behaviour patterns during their flightless period of moult?										Many different behavioural changes have been observed in wild waterfowl during the flightless stage of wing moult with birds frequently becoming inactive and reducing time spent foraging. Increased predation risk, elevated energetic demands of feather re-growth and restriction of foraging opportunities are thought to underlie these changes. By studying captive populations of both a dabbling and a…	49		50	59	2002	BIRD STUDY
9	Anser anser	4	Austin, Graham E.; Rehfisch, Mark M.; Allan, John R.; Holloway, Steve J.								Population size and differential population growth of introduced Greater Canada Geese Branta canadensis and re-established Greylag Geese Anser anser across habitats in Great Britain in the year 2000					3					Capsule Both populations are increasing at a similar rate.Aims During 2000, an extensive survey of introduced Greater Canada Geese and re-established Greylag Geese in Great Britain was undertaken in order to update population estimates lost made between 1988 and 1991.Methods A randomized stratified sample of 1329 of the 61 510 tetrads (2 km x 2 km unit) in Great Britain was surveyed. The habitat …	79	2	243	251	1991	ARDEA
10	Anser anser	4	Mitchell, C.; Patterson, D.; Boyer, P.; Cunningham, P.; McDonald, R.; Meek, E.; Okill, J.D.; Symonds, F.								The summer status and distribution of greylag geese in north and west Scotland.											34		235	238	1987	BIRD STUDY
11	Anser anser	4	PATERSON, IW								THE STATUS AND DISTRIBUTION OF GREYLAG GEESE ANSER-ANSER IN THE UISTS, SCOTLAND					3						4	2	101	121	1986	JOURNAL OF ENVIRONMENTAL RADIOACTIVITY
12	Anser anser	3	McKay, H.; Watola, G. V.; Langton, S. D.; Langton, S. A.								The use of agricultural fields by re-established greylag geese (Anser anser) in England: A risk assessment										Re-established greylag geese are currently increasing at a rate of 12% per annum, are non-migratory and can be observed grazing on agricultural fields. The risk of damage to UK agriculture was, therefore, assessed by counting birds seen feeding on crops during two surveys in Yorkshire, the Midlands and Norfolk, between 1999 and 2002. Numbers were highest and flock sizes greatest during the winter…	152	4	1055	1061	2011	JOURNAL OF ORNITHOLOGY
13	Anser anser	2	Bowler, J; Mitchell, C; Leitch, AJ								Greylag Geese on Tiree and Coll, Scotland: Status, habitat use and movements										Regular counts of Greylag Geese (Anser anser) on the islands of Tiree and Coll, Argyll, Scotland have taken place since 1982. In the last 20 years, there has been a ten-fold increase with numbers leveling out since 2000 at ca. 4,000 geese. Breeding productivity, measured as percentage young in August flocks and brood sizes, was comparable to Greylag Geese on other Hebridean islands. Sightings of …	52		25	36	2005	BIRD STUDY
14	Anser anser	2	Bowler, John								Family cohesion in greylag goose Anser anser broods following catching and ringing.											107	4	597	604	1994	COMPARATIVE BIOCHEMISTRY AND PHYSIOLOGY B-BIOCHEMISTRY & MOLECULAR BIOLOGY
15	Anser anser	0	Austin, G.E.								Determining greylag and Canada goose habitat associations during breeding season.											286		1	41	2002	BTO Research Report
16	Anser anser	0	Bell, M.V.; Newton, A.V.; Newton, S.F.								Roost selection by pink-footed Anser brachyrhynchus and greylag A. anser geese in east central Scotland.											48		40	51	1998	Wildfowl
17	Anser anser	0	Brown, Allan W.								Counts of pink-footed and greylag geese in Lothians and Borders, winter 2001/02.											2002		132	136	2004	Lothian Bird Report
18	Anser anser	0	Coath, Martin								Greylag goose nesting in pine tree.											99	7	365	365	2006	British Birds
19	Anser anser	0	Craik, J.C.A.								Mixed clutches at seabird colonies in west Scotland 1996-2009.										In counts of gulls, terns, wildfowl and waders breeding on about 100 small islands along the mainland coast of west Scotland during 1996[long dash]2009, 123 clutches containing the eggs of two species ('mixed clutches') were found among 69,775 clutches of 20 species (0.18%). The annual percentage varied between 0.09% and 0.33%. Most (89%) mixed clutches contained only one egg of one of the specie…	23		41	52	2010	Seabird
20	Anser anser	0	Gordon, Peter R.								Counts of pink-footed and greylag geese in Lothians and Borders in 1994.											1994		99	102	1996	Lothian Bird Report
21	Anser anser	0	Haines, W.G.								A survey of feral geese in the Harrogate area in the year 2000.											126	1039	161	171	2001	Naturalist (Sheffield)
22	Anser anser	0	Harvey, P.V.; Mitchell, C.; Pennington, M.G.; Okill, J.D.; Ellis, P.M.								The status of the greylag goose in Shetland.											32	3	195	203	2012	Scottish Birds
23	Anser anser	0	Hearn, Richard; Frederiksen, Morten						Boere, G.C.; Galbraith, C.A.; Stroud, D.A.		Monitoring overlapping populations: the greylag goose Anser anser in the Iceland-Britain flyway.													498	499	2006	Waterbirds around the world: a global overview of the conservation, management and research of the world's waterbird flyways. International conference on waterbirds held in Edinburgh in April 2004.
24	Anser anser	0	Insley, Gemma V.								A Scanian greylag goose Anser anser relocated to Scotland.				Skansk gragas Anser anser utvandrad till Skottland.							36	4	272	274	1997	Anser
25	Anser anser	0	Izzard, Martin; Izzard, Liz; Yeoman, Jean; Yeoman, John								White-tailed eagle catching greylag goose.											101	6	326	326	2008	British Birds
26	Anser anser	0	Meek, E.R.								The status of the greylag goose in Orkney - an update.											2007		96	99	2008	Orkney Bird Report
27	Anser anser	0	Meek, Eric								The status of the greylag goose in Orkney.											2002		82	85	2003	Orkney Bird Report
28	Anser anser	0	Mitchell, Carl; Griffin, Larry; Trinder, Mark; Newth, Julia; Urquhart, Christine								The status and distribution of summering Greylag Geese Anser anser in Scotland, 2008-09										Capsule Summering Greylag Geese Anser anser are increasing in number and expanding their range in Scotland.Aims During the summers of 2008 and 2009, extensive surveys of Greylag Geese in Scotland were undertaken to update the current distribution and population estimates, as well as estimate breeding success.Methods Checks of known moult-sites were combined with a random stratified sample of loch…	58	3	338	348	2011	BIRD STUDY
29	Anser anser	0	Paterson, Gavin								Mute swans rearing greylag geese.											21	1	45	45	2000	Scottish Birds
30	Anser anser	0	Pennington, M.G.								Greylag geese breeding in Shetland.										Greylag Geese from the Icelandic breeding population have migrated through Shetland for many years. As the Icelandic population has increased, Greylags have become more common in Shetland as migrants and wintering birds, while more recently an increase in reseeded hillsides in the islands has apparently tempted some to remain to breed. Unst was colonised in 1985, possibly earlier, and birds have …	79	2	283	286	1991	ARDEA
31	Anser anser	0	Pennington, Mike; Harvey, Paul; Mitchell, Carl								A post breeding census of greylag geese in Shetland in 2009.											2009		115	116	2010	Shetland Bird Report
32	Anser anser	0	Redfern, Robin								Greylag goose nesting in oak tree.											95	4	189	189	2002	British Birds
33	Anser anser	0	Rowcliffe, J.M.; Pettifor, R.A.; Mitchell, C.R.								Iceland population of the greylag goose (Anser anser) - the collation and statistical analysis of data and population viability analyses.											165		i	iii, 1-35	2000	Scottish Natural Heritage Research Survey and Monitoring Report
34	Anser anser	0	Swann, Robert L.; Brockway, Ivan K.								Site fidelity of Icelandic greylag geese between winters.										Britain supports almost the entire Icelandic population of Greylag Geese Anser anser in winter and has a special responsibility for the conservation of these birds. To facilitate the successful management of this population, the aim of this analysis was to ascertain the degree of site fidelity on the wintering grounds in relation to age and sex. Observations of marked Icelandic Greylag Geese sugg…	23	4	238	242	2007	Ringing & Migration
35	Anser anser	0	Tilley, Justin; O'Brien, Mark; Boyle, Jamie; Stewart, James								The effect of temporary fencing in reducing goose damage to crops.											6		1	38	2004	RSPB Research Report
36	Anser anser	0	Trinder, Mark; Mitchell, Carl; Swann, Bob; Urquhart, Christine								Status and population viability of Icelandic greylag geese Anser anser in Scotland.										During 2003.2007, the Icelandic Greylag Goose Anser anser population increased from c. 73,000 to c. 100,000 individuals (reversing a decline in numbers recorded during the 1990s), the wintering distribution shifted northwards (c. 60% to Orkney) and breeding success (the proportion of adults which successfully raised young) increased. Count, productivity and re-sighting data were analysed to ident…	60		64	84	2010	Wildfowl
37	Anser anser	0	Trinder, Mark; Rowcliffe, Marcus; Pettifor, Richard; Rees, Eileen; Griffon, L.; Percival, S.; Ogilvie, M.								Status and population viability analyses of geese in Scotland.										Background This report summarises the analysis of census and productivity data collected for the Scottish wintering populations of pink-footed goose (Anser brachyrhynchus), Greenland white-fronted goose (Anser albifrons flavirostris), Icelandic greylag goose (Anser anser), Greenland barnacle goose (Branta leucopsis) and Svalbard barnacle goose (Branta leucopsis). Trends in the population counts a…	107		i	v, 1-97	2005	Scottish Natural Heritage Commissioned Report
1	Anthus petrosus	0	Bull, Alan J.								House sparrow feeding fledged rock pipits.											98	4	216	216	2005	British Birds
2	Anthus petrosus	0	Riddington, Roger								Scandinavian rock pipits in spring 2006.											2006		116	117	2007	Shetland Bird Report
3	Anthus petrosus	0	Sage, Bryan								Unusual feeding behaviour by Eurasian sparrowhawks.											102	7	405	405	2009	British Birds
4	Anthus petrosus	0	Vittery, Alan								The first 'Caucasian' water pipits Anthus spinoletta coutellii and rock pipit Anthus petrosus in Greece.											28	1	78	81	2006	Sandgrouse
1	Anthus pratensis	33	Pearce-Higgins, James W.; Grant, Murray C.								Relationships between bird abundance and the composition and structure of moorland vegetation					2					Capsule Variations in the composition, structure and heterogeneity of moorland vegetation are shown to affect the abundance of eight of nine moorland bird species, with implications for grazing management.Aims To determine how variation in vegetation characteristics affects breeding bird abundance on moorlands.Methods Bird and habitat data from 85 2-km(2) plots in south Scotland and northern Engl…	53		112	125	2006	BIRD STUDY
2	Anthus pratensis	31	Smith, AA; Redpath, SM; Campbell, ST; Thirgood, SJ				Redpath, Steve/B-4640-2012				Meadow pipits, red grouse and the habitat characteristics of managed grouse moors										1. The abundance of meadow pipits appears to be a good indicator of the breeding density of hen harriers on moorland managed for red grouse in Scotland. High densities of hen barriers can limit grouse populations at low density and reduce shooting bags, with repercussions for grouse moor management and conservation. We therefore examined the habitat characteristics of managed grouse moors, asking…	38	2	390	400	2001	JOURNAL OF APPLIED ECOLOGY
3	Anthus pratensis	24	Butchart, SHM; Kilner, RM; Fuisz, T; Davies, NB				Kilner, Rebecca/B-2867-2012				Differences in the nestling begging calls of hosts and host-races of the common cuckoo, Cuculus canorus					2					We compared nestling begging calls of four hosts (reed warbler,, Acrocephalus scirpaceus; great reed warbler, A. arundinaceus; dunnock, Prunella modularis; and meadow pipit, Anthus pratensis) and the respective host-races of the common cuckoo. Note structure varied between host species, but not between cuckoo host-races, so cuckoos did not vary their call-note structure to match that of their hos…	2	4	636	638	2006	BIOLOGY LETTERS
4	Anthus pratensis	24	Fletcher, Kathy; Aebischer, Nicholas J.; Baines, David; Foster, Robin; Hoodless, Andrew N.								Changes in breeding success and abundance of ground-nesting moorland birds in relation to the experimental deployment of legal predator control										P>1. An 8-year-field experiment on moorland in northern England manipulated the abundance of legally controllable predators whilst maintaining consistent habitat conditions. Subsequent changes in both the breeding success and abundance of five ground-nesting bird species were monitored: lapwing Vanellus vanellus, golden plover Pluvialis apricaria, curlew Numenius arquata, red grouse Lagopus lagop…	70	41335	189	201	1998	AGRICULTURE ECOSYSTEMS & ENVIRONMENT
5	Anthus pratensis	23	Evans, Darren M.; Redpath, Stephen M.; Evans, Sharon A.; Elston, David A.; Gardner, Charles J.; Dennis, Peter; Pakeman, Robin J.				Redpath, Steve/B-4640-2012; Evans, Darren/J-9782-2012; Elston, David/H-8199-2013				Low intensity, mixed livestock grazing improves the breeding abundance of a common insectivorous passerine										Livestock grazing is a major driver of ecosystem change and has been associated with significant declines in various bird species in Britain and worldwide. However, there is little experimental evidence to show how grazing affects bird populations. We manipulated livestock densities in a replicated field experiment and found that mixed sheep and cattle grazing, at low intensity, improved the bree…	65		345	354	2003	ANIMAL BEHAVIOUR
6	Anthus pratensis	22	Evans, DM; Redpath, SM; Evans, SA; Elston, DA; Dennis, P				Redpath, Steve/B-4640-2012; Evans, Darren/J-9782-2012; Elston, David/H-8199-2013				Livestock grazing affects the egg size of an insectivorous passerine										Livestock grazing is a major driver of ecosystem change, and has been associated with significant declines in various bird species worldwide. In Britain, there is particular concern that severe grazing pressure is deleteriously affecting vegetation and birds in upland regions. However, the mechanism by which grazing affects birds is unclear. Here, we report for the first time, to our knowledge, t…	1	3	322	325	2005	BIOLOGY LETTERS
7	Anthus pratensis	16	Vanhinsbergh, DP; Chamberlain, DE								Habitat associations of breeding Meadow Pipits Anthus pratensis in the British uplands					2					Habitat associations of Meadow Pipits breeding in British upland 1 km and 10 km squares were investigated using data from the British Trust for Ornithology's (BTO) Breeding Bird Survey (BBS, 1994-97), The New Atlas of Breeding Birds in Britain and ireland 1988-1991 and habitat data front the Institute of Terrestrial Ecology's (ITE) Land Cover Survey (1994). Meadow, Pipit density was highest in 20…	107	4	331	340	2005	AGRICULTURE ECOSYSTEMS & ENVIRONMENT
8	Anthus pratensis	16	WALTON, KC								DIET OF MEADOW PIPITS ANTHUS-PRATENSIS ON MOUNTAIN GRASSLAND IN SNOWDONIA											121	3	325	329	1979	IBIS
9	Anthus pratensis	15	Woodhouse, SP; Good, JEG; Lovett, AA; Fuller, RJ; Dolman, PM								Effects of land-use and agricultural management on birds of marginal farmland: a case study in the Llyn peninsula, Wales										Extensive pastoral farming and marginal land are important for many bird species of conservation concern. This study identified the bird species associated with a range of marginal upland habitats in the Llyn peninsula in Wales and discusses the impact on these species of further land-use change. Bird and habitat surveys of 45 sites were conducted between May and July 2000. The bird species obser…	48		159	172	2001	BIRD STUDY
10	Anthus pratensis	13	THIRGOOD, SJ; LECKIE, FM; REDPATH, SM				Redpath, Steve/B-4640-2012				DIURNAL AND SEASONAL-VARIATION IN-LINE TRANSECT COUNTS OF MOORLAND PASSERINES					3						42		257	259	1995	BIRD STUDY
11	Anthus pratensis	12	SEEL, DC; WALTON, KC								NUMBERS OF MEADOW PIPITS ANTHUS-PRATENSIS ON MOUNTAIN FARM GRASSLAND IN NORTH-WALES IN THE BREEDING SEASON											121	2	147	164	1979	IBIS
12	Anthus pratensis	10	Clarke, R; Combridge, M; Combridge, P								A comparison of the feeding ecology of wintering Hen Harriers Circus cyaneus centred on two heathland areas in England										Small passerines were the principal prey in pellets from Hen Harrier Circus cyaneus communal winter roosts in Breckland and the New Forest, Skylark Alauda arvensis remains predominate in the pellets from Breckland. Dunnock Prunella modularis and Greenfinch Carduelis chloris were also important. The contents of New Forest pellets reflected the position of each roost. In pellets from a roost on the…	139	1	4	18	1997	IBIS
13	Anthus pratensis	10	Pearce-Higgins, J.W.; Grant, M.C.								The effects of grazing-related variation in habitat on the distribution of moorland skylarks Alauda arvensis and meadow pipits Anthus pratensis.											67		155	163	2002	Aspects of Applied Biology
14	Anthus pratensis	8	Buchanan, GM; Pearce-Higgins, JW; Grant, MC								Observer variation in estimates of Meadow Pipit Anthus pratensis and Skylark Alauda arvensis abundance on moorland					1						53		92	95	2006	BIRD STUDY
15	Anthus pratensis	8	Madders, M								Hen Harrier Circus cyaneus foraging activity in relation to habitat and prey					1					Capsule In west Scotland, the birds foraged in accordance with the distribution of prey and vegetation associated with early-growth conifer forests.Aims To investigate foraging Hen Harrier activity in relation to vegetation cover and structure and the abundance of potential prey.Methods Forty 1 x 1-km sample observation areas were monitored at four sites in west Scotland.Results Foraging time in …	50		55	60	2003	BIRD STUDY
16	Anthus pratensis	7	Baines, David; Redpath, Stephen; Richardson, Michael; Thirgood, Simon				Redpath, Steve/B-4640-2012				The direct and indirect effects of predation by Hen Harriers Circus cyaneus on trends in breeding birds on a Scottish grouse moor										Two phases of an experimental reduction in management at Langholm Moor in southwest Scotland provided an insight into factors that determined trends in the abundance of moorland birds. In 1992 the historical control of breeding Hen Harriers Circus cyaneus stopped and in 2000 grouse moor management was discontinued. Golden Plover Pluvialis apricaria, Lapwing Vanellus vanellus, Curlew Numenius arqu…	150		27	36	2008	IBIS
17	Anthus pratensis	7	Douglas, David J. T.; Evans, Darren M.; Redpath, Stephen M.				Redpath, Steve/B-4640-2012; Evans, Darren/J-9782-2012				Selection of foraging habitat and nestling diet by Meadow Pipits Anthus pratensis breeding on intensively grazed moorland					3					Capsule Foraging sites with low vegetation height and density, but with high arthropod biomass, are selected.Aims To test the hypothesis that on intensively grazed moorland, breeding Meadow Pipits forage for nestling food where arthropod prey are most readily available, and therefore that foraging site choice is a function of prey abundance and vegetation structure.Methods Observations of adults …	55		290	296	2008	BIRD STUDY
18	Anthus pratensis	7	KalejtaSummers, B								Diet and habitat preferences of wintering passerines on the Taff/Ely saltmarshes					3					The ecology of passerines using saltmarshes in winter is poorly known. The distribution and abundance of passerines on the Taff/Ely saltmarshes were studied between October 1983 and March 1984. Twenty-two species of passerine were recorded. Their numbers fluctuated irregularly throughout the winter. The four most abundant species, Skylark, Chaffinch, Meadow Pipit and Reed Bunting, showed preferen…	44		367	373	1997	BIRD STUDY
19	Anthus pratensis	6	Amar, Arjun; Thirgood, Simon; Pearce-Higgins, James; Redpath, Steve				Amar, Arjun /F-3815-2011; Redpath, Steve/B-4640-2012				The impact of raptors on the abundance of upland passerines and waders										The issue of predator limitation of vertebrate prey populations is contentious, particularly when it involves species of economic or conservation value. In this paper, we examine the case of raptor predation on upland passerines and waders in Scotland. We analysed the abundance of five wader and passerine species on an upland sporting estate in southern Scotland during an eight-year period when h…	117	8	1143	1152	2008	OIKOS
20	Anthus pratensis	6	Vandenberghe, Charlotte; Prior, Gina; Littlewood, Nick A.; Brooker, Rob; Pakeman, Robin				Brooker, Rob/F-9569-2012				Influence of livestock grazing on meadow pipit foraging behaviour in upland grassland										Changes in grazing management are believed to be responsible for declines in populations of birds breeding in grassland over the last decades. The relationships between grazing management regimes, vegetation structure and composition and the availability of invertebrate food resources to passerine birds remain poorly understood. In this Study, we investigated the foraging site selection of meadow…	10	7	662	670	2009	BASIC AND APPLIED ECOLOGY
21	Anthus pratensis	5	Atkinson, Philip W.; Fuller, Richard A.; Gillings, Simon; Vickery, Juliet A.				Atkinson, Philip/B-8975-2009; Fuller, Richard/B-7971-2008	Fuller, Richard/0000-0001-9468-9678			Counting birds on farmland habitats in winter					3					Capsule Perimeter counts underestimate the number of birds using agricultural fields.Aims To determine the degree to which farmland birds may be undercounted on field surveys and the factors influencing this.Methods In a study of 96 fields, birds in the field were counted during a walk of the perimeter. Afterwards transects were walked across the field to determine the number of birds missed. Add…	53		303	309	2006	BIRD STUDY
22	Anthus pratensis	4	Evans, DM; Redpath, SM; Evans, SA				Redpath, Steve/B-4640-2012; Evans, Darren/J-9782-2012				Seasonal patterns in the productivity of Meadow Pipits in the uplands of Scotland										In many birds, it is assumed chat conditions for breeding follow a seasonal pattern of improvement and then decline and that for each individual in the population the optimal clutch size is larger when conditions for breeding are more favorable. While this is assumed to be the case for single-brooded species, the situation is more complex for multi-brooded species, which start breeding before the…	119	11	1834	1840	2010	OIKOS
23	Anthus pratensis	3	Matthiopoulos, Jason; Graham, Kate; Smout, Sophie; Asseburg, Christian; Redpath, Stephen; Thirgood, Simon; Hudson, Peter; Harwood, John				Redpath, Steve/B-4640-2012				Sensitivity to assumptions in models of generalist predation on a cyclic prey										Ecological theory predicts that generalist predators should damp or suppress long-term periodic fluctuations ( cycles) in their prey populations and depress their average densities. However, the magnitude of these impacts is likely to vary depending on the availability of alternative prey species and the nature of ecological mechanisms driving the prey cycles. These multispecies effects can be mo…	88	10	2576	2586	2007	ECOLOGY
24	Anthus pratensis	1	Kilner, RM; Noble, DG; Davies, NB				Kilner, Rebecca/B-2867-2012				How should cuckoo chicks signal in different host nests?											14	8	322	322	1999	TRENDS IN ECOLOGY & EVOLUTION
25	Anthus pratensis	1	New, Leslie F.; Buckland, Stephen T.; Redpath, Stephen; Matthiopoulos, Jason				Buckland, Stephen/A-1998-2012; Redpath, Steve/B-4640-2012				Hen harrier management: insights from demographic models fitted to population data										1. The impact of hen harriers Circus cyaneus on red grouse Lagopus lagopus scoticus populations has received much attention. However, little has been done to model the population dynamics of the hen harrier alone. Such a model is needed to help inform the differing aims of conserving harriers and managing grouse moors, which serves as a reflection of human-wildlife conflicts around the globe.2. O…	48	5	1187	1194	2011	JOURNAL OF APPLIED ECOLOGY
26	Anthus pratensis	1	Prior, Gina L.; Evans, Darren M.; Redpath, Stephen; Thirgood, Simon J.; Monaghan, Pat				Redpath, Steve/B-4640-2012; Monaghan, Pat/A-4271-2008; Evans, Darren/J-9782-2012				Birds bias offspring sex ratio in response to livestock grazing										Livestock grazing, which has a large influence on habitat structure, is associated with the widespread decline of various bird species across the world, yet there are few experimental studies that investigate how grazing pressure influences avian reproduction. We manipulated grazing pressure using a replicated field experiment, and found that the offspring sex ratio of a common upland passerine, …	7	6	958	960	2011	BIOLOGY LETTERS
27	Anthus pratensis	0	Buckton, Seb T.; Ormerod, Steve J.								Patterns of activity in meadow pipits (Anthus pratensis), whinchats (Saxicola rubetra) and wheatears (Oenanthe oenanthe) in upland Wales, and the influence of weather.				Aktivita lindusky lucni (Anthus pratensis), brambornicka hnedeho (Saxicola rubetra) a belorita sedeho (Oenanthe oenanthe) v horskych podminkach Walesu.							33	1	23	35	1997	Sylvia
28	Anthus pratensis	0	Dickson, R.C.								Merlin impaling prey on barbed wire fence.											28		50	50	2008	Scottish Birds
29	Anthus pratensis	0	Gricks, Nathan								Short-eared owl preying on merlin.											98	1	46	46	2005	British Birds
30	Anthus pratensis	0	Prowse, Alan								Meadow pipits at Walton Heath: a study of separation distance and indicative territory size.											69		166	173	2008	London Bird Report
31	Anthus pratensis	0	Walsh, Patrick T.; Evans, Darren M.; Hansell, Mike; Ruxton, Graeme D.				Evans, Darren/J-9782-2012				Factors influencing nocturnal egg-turning frequency in Meadow Pipits Anthus pratensis					1						54		133	136	2007	BIRD STUDY
1	Anthus trivialis	28	Hewson, Chris M.; Amar, Arjun; Lindsell, Jeremy A.; Thewlis, Richard M.; Butler, Simon; Smith, Ken; Fuller, Robert J.				Amar, Arjun /F-3815-2011; Butler, Simon/H-1703-2011				Recent changes in bird populations in British broadleaved woodland										This paper presents estimated national and regional changes in numbers of breeding woodland birds in predominantly broadleaved woodland in Britain between the mid 1980s and 2003-04, derived from the Repeat Woodland Bird Survey (RWBS). A total of 405 sites across Britain for which historical data on bird populations were available were re-surveyed by BTO and RSPB fieldworkers during the RWBS. Chan…	149		14	28	2007	IBIS
2	Anthus trivialis	25	Burton, NHK				Piper, Walter/B-7908-2009				Nest orientation and hatching success in the tree pipit Anthus trivialis										Many open-nesting bird species orient their nests relative to surrounding vegetation to avoid adverse environmental conditions. In eastern England, tree pipit Anthus trivialis nests predominantly faced east, an orientation that provided shelter from prevailing WSW winds, allowed warming by the morning sun and which, together with relatively high field layer cover, shaded nest contents from the mi…	37	4	312	317	2006	JOURNAL OF AVIAN BIOLOGY
3	Anthus trivialis	6	Burton, Niall H. K.								Influences of restock age and habitat patchiness on Tree Pipits Anthus trivialis breeding in Breckland pine plantations										The British Tree Pipit Anthus trivialis population has shown a marked decline in recent decades, together with a range contraction that has been most apparent in central and southeast England. In East Anglia, the species is now largely restricted to heathland and, in particular, the conifer plantations established on light soils in these areas. Here I evaluate how Tree Pipits are influenced by th…	149		193	204	2007	IBIS
4	Anthus trivialis	6	Summers, Ron W.								Stand selection by birds in Scots pinewoods in Scotland: the need for more old-growth pinewood										A study at Abernethy Forest, Scotland, examined stand selection by some of the birds of conservation concern that inhabit pinewoods. Abernethy Forest was ideally suited for the study because all four main stand types of forest development (stand initiation, stem exclusion, understorey reinitiation and old-growth) were represented. Capercaillies Tetrao urogallus (both males and females) and crossb…	149		175	182	2007	IBIS
5	Anthus trivialis	2	Fuller, Robert J.; Atkinson, Philip W.; Garnett, Martin C.; Conway, Greg J.; Bibby, Colin J.; Johnstone, Ian G.				Atkinson, Philip/B-8975-2009				Breeding bird communities in the upland margins (ffridd) of Wales in the mid-1980s					2					Capsule The bird communities in the Welsh marginal uplands were frequently distinct from those of adjacent habitats and consisted of heterogeneous mixtures of species strongly influenced by vegetation composition and land-use.Aims To provide 6 unique description of the influence of vegetation, altitude and regional position on the bird communities of upland margins and to create a baseline agains…	26	1	48	55	2011	Ringing & Migration
6	Anthus trivialis	1	Burton, Niall H. K.								Reproductive success of Tree Pipits Anthus trivialis in relation to habitat selection in conifer plantations										Aspects of the reproductive success of Tree Pipits Anthus trivialis were examined in relation to broad-scale habitat and nest-site selection in Thetford Forest, a coniferous plantation forest in eastern England. Three habitat classes were defined corresponding to previously reported densities of Tree Pipits: clearfell and recently planted stands (habitat class A: low density), stands 2-5 years ol…	151	2	361	372	2009	IBIS
7	Anthus trivialis	1	Taylor, Sarah D.; Summers, Ron W.								Breeding numbers and stand type preferences of Redstarts Phoenicurus phoenicurus and Tree Pipits Anthus trivialis in a Scots Pine Pinus sylvestris wood										Capsule Old-growth stands within an ancient native pinewood in Scotland provide an important habitat for both species.Aims To obtain estimates of densities and total numbers of male Redstarts and Tree Pipits in a native pinewood, and to describe forest stand type preferences.Methods Singing males were recorded along transects in Abernethy Forest, comprising ancient native pinewood and Scots Pine …	53		177	186	2006	BIRD STUDY
8	Anthus trivialis	0	Eddowes, Mark J.								Correlations between long distance migrants in year-to-year fluctuations of arrival timing.										This study investigated the year-to-year fluctuations in arrival timing in the UK of 23 species of summer migrants. Median arrival dates, estimated from BirdTrack survey data from 2002-10, and Cheshire and Wirral first-arrival dates were analysed using Pearson correlations. Highly statistically significant correlations were found for pairings within a group comprising some warblers and the Pied F…	56		120	126	2009	BIRD STUDY
1	Apus apus	114	OCONNOR, RJ								EGG WEIGHTS AND BROOD REDUCTION IN THE EUROPEAN SWIFT (APUS-APUS)											81	2	133	145	1979	CONDOR
2	Apus apus	56	MARTINS, TLF; WRIGHT, J								COST OF REPRODUCTION AND ALLOCATION OF FOOD BETWEEN PARENT AND YOUNG IN THE SWIFT (APUS-APUS)										We manipulated brood sizes to promote different levels of parental effort in the common swift (Apus apus). This provided a powerful method for testing hypotheses regarding parental investment decisions concerning optimal allocation strategies between parents and young. Data were analyzed on a visit-by-visit basis regarding changes in parental and chick body mass, the mass of prey delivered, and t…	4	3	213	223	1993	BEHAVIORAL ECOLOGY
3	Apus apus	40	MARTINS, TLF; WRIGHT, J								BROOD REDUCTION IN RESPONSE TO MANIPULATED BROOD SIZES IN THE COMMON SWIFT (APUS-APUS)										Following a brood size manipulation experiment on the common swift (Apus apus) in which different levels of parental effort were created, brood reduction occurred in all five nests manipulated to four chicks and in two of the five manipulated to three young. This provided an opportunity for looking in detail at the parental investment decisions concerning allocation strategies between parent and …	32	1	61	70	1993	BEHAVIORAL ECOLOGY AND SOCIOBIOLOGY
4	Apus apus	27	Tompkins, DM; Jones, T; Clayton, DH								Effect of vertically transmitted ectoparasites on the reproductive success of Swifts (Apus apus)										1. Parasites that are transmitted vertically from parent hosts to offspring are expected to be relatively benign, because their fitness depends on successful host reproduction. The effects of two species of vertically transmitted ectoparasite on the reproductive success of swifts (Apus apus L.) were tested. Populations of the Chewing Louse, Dennyus hirundinis (L.) (Phthiraptera: Menoponidae), and…	10	6	733	740	1996	FUNCTIONAL ECOLOGY
5	Apus apus	17	Martins, TLF								Fledging in the common swift, Apus apus: Weight-watching with a difference					1					Fledging in the common swift involves young having to switch suddenly and completely from the sedentary lifestyle of a nestling to continuous flight with no post-hedging care. Using manipulations of brood size and the contrasting resource conditions in different breeding seasons, I observed fledging under a range of chick states. Poorly fed chicks took longer to hedge, and had lower body mass and…	54		99	108	1997	ANIMAL BEHAVIOUR
6	Apus apus	9	HUTSON, AM								THE POPULATION OF THE LOUSE-FLY, CRATAERINA-PALLIDA (DIPTERA, HIPPOBOSCIDAE) ON THE EUROPEAN SWIFT, APUS-APUS (AVES, APODIDAE)											194	JUL	305	316	1981	JOURNAL OF ZOOLOGY
7	Apus apus	8	Wotton, Simon R.; Field, Rob; Langston, Rowena H.W.; Gibbons, David W.								Homes for birds: the use of houses for nesting by birds in the UK.										A joint survey, by RSPB and the BBC Radio 4 'Today' programme, investigated the use of houses for nesting by four bird species (Common Swift Apus apus, House Martin Delichon urbica, Common Starling Sturnus vulgaris and House Sparrow Passer domesticus). Almost 10,000 completed questionnaires were received, representing a wide range of house types in rural, suburban and urban locations, with most r…	95	11	586	592	2002	British Birds
8	Apus apus	7	Martins, TLF; Blakey, JK; Wright, J								Low incidence of extra-pair paternity in the colonially nesting common swift Apus apus										The frequency of extra-pair paternity in a wild colony of swifts Apus apus was determined by multilocus DNA fingerprinting in two successive breeding seasons. The data were used to examine the expectation that extra-pair paternity is frequent in colonial-nesting species, either for proximal reasons such as the increased opportunity for extra-pair matings, or because extra-pair matings are importa…	33	4	441	446	2002	JOURNAL OF AVIAN BIOLOGY
9	Apus apus	5	Thomson, DL; DouglasHome, H; Furness, RW; Monaghan, P				Monaghan, Pat/A-4271-2008				Breeding success and survival in the common swift Apus apus: A long-term study on the effects of weather					1					In an analysis of data collected between 1954 and 1993, the breeding success of swifts Apus apus was found to have been positively related to temperatures in June, especially in recent years. Adult survival until the next breeding season, by contrast, was found to have been more vulnerable to low temperatures in July, at the end of the breeding season. In addition to the effects of changes in Jun…	239		29	38	1996	JOURNAL OF ZOOLOGY
10	Apus apus	2	Walker, Mark D.; Rotherham, Ian D.								The breeding success of Common Swifts Apus apus is not correlated with the abundance of their Louse Fly Crataerina pallida parasites										Capsule Parasitism has no apparent detrimental effect.Aims To determine whether parasitism by a haematophagous nest ectoparasite, the Louse Fly Crataerina pallida has a detrimental effect on the reproductive success of its Common Swift Apus apus hosts.Methods An association between C. pallida abundance and various host life-history parameters indicative of host reproductive success were sought.Re…	57	4	504	508	2010	BIRD STUDY
11	Apus apus	1	Summers, Ron								Swifts nesting in Scots pines at Abernethy Forest, Strathspey.											47	6	1235	1237	2010	JOURNAL OF MEDICAL ENTOMOLOGY
12	Apus apus	1	Walker, Mark D.; Rotherham, Ian D.								No effect of the ectoparasite Crataerina pallida on reproduction of Common Swifts Apus apus										Previous studies have failed to ascertain negative effects of the Swift Lousefly Crataerina pallida parasitism on Common Swifts Apus apus. Abundances of C. pallida were experimentally manipulated to create broods experiencing either enhanced or reduced parasitism, and host life-history traits were examined. No significant differences in clutch and brood size, rate of growth, asymptotic and fledgi…	105	5	280	280	2012	British Birds
13	Apus apus	0	Allen, Noel								A remarkably late departure.											22		33	33	1996	Exmoor Naturalist
14	Apus apus	0	Archer, Michael G.								Male sparrowhawk apparently preying on swift.											41		40	41	2005	Sorby Record
15	Apus apus	0	Bloomfield, Andrew								Hunting technique used by Eurasian sparrowhawk attempting to catch a common swift.											99	7	368	368	2006	British Birds
16	Apus apus	0	Burton, Harvey								Swifts in Speyside.											21	1	48	49	2000	Scottish Birds
17	Apus apus	0	Dolphin, Alan K.								Unusual flight behaviour of common swift.											95	1	24	24	2002	British Birds
18	Apus apus	0	Evans, Karl L.; Newton, Jason; Mallord, John W.; Markman, Shai				Newton, Jason/A-9536-2009	Newton, Jason/0000-0001-7594-3693			Stable Isotope Analysis Provides New Information on Winter Habitat Use of Declining Avian Migrants That Is Relevant to Their Conservation										Winter habitat use and the magnitude of migratory connectivity are important parameters when assessing drivers of the marked declines in avian migrants. Such information is unavailable for most species. We use a stable isotope approach to assess these factors for three declining African-Eurasian migrants whose winter ecology is poorly known: wood warbler Phylloscopus sibilatrix, house martin Deli…	7	4			2012	PLOS ONE
19	Apus apus	0	Grist, Norman R.								Summertime swifts.											24	1	94	95	2002	Glasgow Naturalist
20	Apus apus	0	Lilley, Harold A.								Magpie taking adult common swift.											102	8	469	469	2009	British Birds
21	Apus apus	0	Martin, Brian								Swifts, preliminary survey 1994.											1994		97	99	1995	Cheshire and Wirral Bird Report
22	Apus apus	0	Moore, Derek								Unusual open aspect of nest of Common Swift.											105	5	280	280	2012	British Birds
23	Apus apus	0	Overall, Roy								Common swift nestlings attacked by wasps.											95	4	191	192	2002	British Birds
24	Apus apus	0	Perrins, C.M.								Roosting behaviour of common swifts.											94	4	204	205	2001	British Birds
25	Apus apus	0	Roberts, Graham C.M.								The 1999-2000 Sussex breeding swift survey, comparison with the 1968-70 survey and conservation issues.											53		201	206	2001	Sussex Bird Report
26	Apus apus	0	Smart, John H.								Common swifts flying with lowered legs.											91	9	377	378	1998	British Birds
27	Apus apus	0	Vernon, Rae								Swifts feeding by artificial light.											96	3	142	142	2003	British Birds
28	Apus apus	0	Walker, Mark D.; Rotherham, Ian D.								No evidence of increased parental investment by Common Swifts Apus apus in response to parasite load in nests										Capsule Common Swifts did not increase levels of parental care in response to increased levels of Louse Flies Crataerina pallida in their nests	58	2	217	220	2011	BIRD STUDY
29	Apus apus	0	Wright, Malcolm								Roosting behaviour of common swift.											52		26	28	2003	Suffolk Birds
30	Apus apus	0	Wright, Malcolm; Brenchley, Anne; Evans, Simon; Howe, Tony; Underwood, Darren								Roosting behaviour of common swifts.											93	3	145	145	2000	British Birds
31	Apus apus	0	Wright, Malcolm; Wright, Rosemary								Probable object play behaviour among Common Swifts.											32	2	97	105	2010	Dutch Birding
1	Aquila chrysaetos	189	Fielding, AH; Haworth, PF								Testing the generality of bird-habitat models										Bird-habitat models are frequently used as predictive modeling tools-for example, to predict how a species will respond to habitat modifications. We investigated the generality of the predictions from this type of model. Multivariate models were developed for Golden Eagle (Aquila chrysaetos), Raven (Corvus corax), and Buzzard (Buteo buteo) living in northwest Scotland. Data were obtained for all …	9	6	1466	1481	1995	CONSERVATION BIOLOGY
2	Aquila chrysaetos	65	Thirgood, S; Redpath, S; Newton, I; Hudson, P				Redpath, Steve/B-4640-2012				Raptors and Red Grouse: Conservation conflicts and management solutions										Recovering predator populations may present problems for conservationists if their prey are of economic or conservation value. We address this issue by examining the conflict between raptor conservation and management of Red Grouse (Lagopus l. scoticus) in Britain. Heather moorland is a distinctive habitat that supports an important assemblage of breeding birds. Large areas of moorland are manage…	14	1	95	104	2000	CONSERVATION BIOLOGY
3	Aquila chrysaetos	46	Whitfield, DP; Fielding, AH; Mcleod, DRA; Haworth, PF								Modelling the effects of persecution on the population dynamics of golden eagles in Scotland										We used observations of the age structure and breeding productivity of the Scottish population of golden eagles Aquila chrysaetos together with the classic theory of population dynamics to derive current 'unmanipulated' estimates of life history parameters. We then used regional differences in age structure associated with differences in persecution intensity to derive estimates of prospective 'p…	119	3	319	333	2004	BIOLOGICAL CONSERVATION
4	Aquila chrysaetos	43	WATSON, J; RAE, SR; STILLMAN, R								NESTING DENSITY AND BREEDING SUCCESS OF GOLDEN EAGLES IN RELATION TO FOOD-SUPPLY IN SCOTLAND										1. Nesting density and breeding success of golden eagles Aquila chrysaetos were measured in six areas across Scotland in 1982-85 and in three additional test areas in 1985.2. An index of food abundance was obtained from prey recorded on line transects in all study areas in most years.3. In the original six areas, nesting density ranged from 14.7 to 26.1 pairs per 1000 km2 and breeding success fro…	61	3	543	550	1992	JOURNAL OF ANIMAL ECOLOGY
5	Aquila chrysaetos	32	Whitfield, DP; Fielding, AH; Mcleod, DRA; Haworth, PF								The effects of persecution on age of breeding and territory occupation in golden eagles in Scotland										Several studies have documented negative effects of persecution by humans on the population dynamics of large birds of prey. Several areas have seen a reduction in persecution in modern times, but the demography of large raptors still makes these birds vulnerable to such effects. In a GIS analysis, utilising data collected during two national censuses of the golden eagle Aquila chrysaetos in Scot…	118	2	249	259	2004	BIOLOGICAL CONSERVATION
6	Aquila chrysaetos	23	Whitfield, DP; Mcleod, DRA; Fielding, AH; Broad, RA; Evans, RJ; Haworth, PF								The effects of forestry on golden eagles on the island of Mull, western Scotland										1. The afforestation of previously open habitats continues to involve conservation organizations in assessing effects on important species. We investigated the effects of commercial afforestation on golden eagles Aquila chrysaetos on the island of Mull, western Scotland, using long-term data on eagle reproductive success and occupancy on 30 home ranges, largely during 1981-99.2. We modelled home …	148		198	202	2006	IBIS
7	Aquila chrysaetos	21	Chamberlain, Dan E.; Rehfisch, Mark R.; Fox, Antony D.; Desholm, Mark.; Anthony, Sarah J.				publist, CMEC/C-3010-2012; Fox, Anthony/I-7465-2013; Desholm, Mark/J-5980-2013				The effect of avoidance rates on bird mortality predictions made by wind turbine collision risk models											38	6	1208	1220	2001	JOURNAL OF APPLIED ECOLOGY
8	Aquila chrysaetos	21	WATSON, J								GOLDEN EAGLE AQUILA-CHRYSAETOS BREEDING SUCCESS AND AFFORESTATION IN ARGYLL					3					Breeding success (fledged young/pair) was recorded for 15 pairs of Golden Eagles in Argyll over 10 years 1980-89. The amount of young plantation forestry in the potential hunting ranges of the 15 pairs of eagles was measured. There was no significant relationship between the amount of forestry in each range in 1980 and mean breeding success over the period 1980-89. However there was a significant…	39		203	206	1992	BIRD STUDY
9	Aquila chrysaetos	20	WATSON, A; PAYNE, S; RAE, R								GOLDEN EAGLES AQUILA-CHRYSAETOS - LAND-USE AND FOOD IN NORTHEAST SCOTLAND											131	3	336	348	1989	IBIS
10	Aquila chrysaetos	19	Fielding, Alan H.; Whitfield, D. Philip; McLeod, David R. A.								Spatial association as an indicator of the potential for future interactions between wind energy developments and golden eagles Aquila chrysaetos in Scotland										Despite their environmental benefits in generating electricity without emission of 'greenhouse' gases, wind farms have attracted controversy with regard to their impacts on birds, especially golden eagles Aquila chrysaetos. Evidence from USA studies suggest eagle fatalities through collision with turbines may be the main potential impact whereas for breeding eagles in Scotland, displacement from …	131	3	359	369	2006	BIOLOGICAL CONSERVATION
11	Aquila chrysaetos	19	Pain, DJ; Hill, D; McCracken, DI				McCracken, David/G-6869-2012	McCracken, David/0000-0001-5057-0448			Impact of agricultural intensification of pastoral systems on bird distributions in Britain 1970-1990										The distribution of six species of birds known to depend on extensive pastoral systems, as published in atlases of breeding birds, was mapped in Britain for two time periods: 1968-1972 and 1990-1992. The species chosen (corncrake Crex crex, golden eagle Aquila chrysaetos hen harrier Circus cyaneus, stone curlew Burhinus oedicnemus, chough Pyrrhocorax pyrrhocorax and red-backed shrike Lanius collu…	64	1	19	32	1997	AGRICULTURE ECOSYSTEMS & ENVIRONMENT
12	Aquila chrysaetos	18	Green, RE								The status of the Golden Eagle in Britain in 1992					1					A survey of Golden Eagles was carried out in 1992 which, as far as possible, repeated that of 1982-83. In total, 422 pairs were located, 0.5% fewer than in 1982-83. However, changes between 1982-83 and 1992 in the number of pairs in 7 geographical regions varied between a 27% decline (from 22 pairs to 16) and a 28% increase (from 53 pairs to 68). The mean number of young reared per pair in 1992 w…	43		20	27	1996	BIRD STUDY
13	Aquila chrysaetos	18	WATSON, J; LEITCH, AF; RAE, SR								THE DIET OF GOLDEN EAGLES AQUILA-CHRYSAETOS IN SCOTLAND										The diet of Golden Eagles Aquila chrysaetos in Scotland is described, based on 1793 items identified in pellets. In parts of the range, winter diet differed from summer, with more deer (mainly carrion) and fewer grouse in winter. The summer diet in mine ecological regions differed significantly amongst most regions. Six distinct types of diet were recognized, with varying proportions of deer, she…	54		212	220	2007	BIRD STUDY
14	Aquila chrysaetos	17	McGrady, MJ; Grant, JR; Bainbridge, IP; McLeod, DRA								A model of Golden Eagle (Aquila chrysaetos) ranging behavior										Eighty territory-holding adult Golden Eagles (Aquila chrysaetos) were radiotracked in all seasons from 1991-96 in western Scotland. Mean territory size was 6827 ha (range = 2604-12 835 ha). Core areas (50%, of locations) used by tracked eagles averaged 498 ha. Tracked eagles moved tip to 9 km from the center of their territories, but over 98% of observations were <6 km of the center. Log-linear m…	135	4	387	393	1993	IBIS
15	Aquila chrysaetos	16	Watson, J; Whitfield, P								A conservation framework for the Golden Eagle (Aquila chrysaetos) in Scotland										The current population of around 420 breeding pairs of Golden Eagles (Aquila chrysaetos) in Scotland has been relatively stable for the past two decades. A century ago, both the breeding population and breeding range were probably much less than now, although a century before that the range was much more extensive than it is even today. Current factors constraining the Golden Eagle in Scotland in…	103	3	303	312	2002	BIOLOGICAL CONSERVATION
16	Aquila chrysaetos	15	Thirgood, SJ; Redpath, SM; Graham, IM				Redpath, Steve/B-4640-2012; Graham, Isla/K-6463-2012	Graham, Isla/0000-0001-7018-3269			What determines the foraging distribution of raptors on heather moorland?										Foraging theory predicts that mobile predators Such as raptors should hunt more frequently in habitat patches yielding the greatest energy gains. Raptor foraging distributions may, however, be constrained by nest location and by competition between different raptor species. We tested these hypotheses in a moorland raptor assemblage including two vole specialists and three generalist predators. We…	134	1	27	31	1992	IBIS
17	Aquila chrysaetos	14	McLeod, David R.A.; Whitfield, D. Philip; Alan H., Fielding; Haworth, Paul F.; McGrady, Michael J.								Predicting home range use by golden eagles Aquila chrysaetos in western Scotland.										The conservation and management of golden eagles Aquila chrysaetos requires information on home range, which is expensive and time-consuming to collect. We describe modelling techniques for predicting golden eagle ranging behaviour within a Geographic Information System (GIS). The model, called PAT (Predicting Aquila Territory), used data on ranging behaviour and geospatial factors from two areas…	36	1	41	49	2002	JOURNAL OF RAPTOR RESEARCH
18	Aquila chrysaetos	14	Walker, D.; McGrady, M.; McCluskie, A.; Madders, M.; McLeod, D.R.A.								Resident golden eagle ranging behaviour before and after construction of a windfarm in Argyll.										Resident Golden Eagle ranging behaviour was monitored over 776 observation hours before and after construction of a windfarm in Argyll, western Scotland between 1997 and 2004. Overall size of the eagle range that was potentially affected by the windfarm or male, female and both eagles) was similar before and after construction. Eagles appeared to change their ranging to avoid the.1vindfarm site. …	100	1	15	24	2003	OIKOS
19	Aquila chrysaetos	14	WATSON, J; LEITCH, AF; BROAD, RA								THE DIET OF THE SEA EAGLE HALIAEETUS-ALBICILLA AND GOLDEN EAGLE AQUILA-CHRYSAETOS IN WESTERN SCOTLAND										The diets of Sea Eagles Haliaeetus albicilla and Golden Eagles Aquila chrysaetos living sympatrically in western Scotland were studied using pellets and prey remains collected at roosts and nest sites throughout the year. Both species showed changes in diet between winter and summer, and there were differences between species in both seasons. As a rule, Sea Eagles took proportionately more seabir…	25		24	40	2005	Scottish Birds
20	Aquila chrysaetos	11	Bourke, Brian P.; Frantz, Alain C.; Lavers, Christopher P.; Davison, Angus; Dawson, Deborah A.; Burke, Terry A.				Burke, Terry/B-3196-2011; Davison, Angus/C-3156-2009; Bourke, Brian/A-9985-2012	Davison, Angus/0000-0003-2554-8585; Bourke, Brian/0000-0002-2638-0967			Genetic signatures of population change in the British golden eagle (Aquila chrysaetos)										The golden eagle (Aquila chrysaetos) was once widely distributed in the uplands of the British Isles, but is now extinct in Ireland, and largely confined to the highlands and islands of Scotland. As the precise extent and severity of the reduction in population size are unclear, it is important to understand how the population was affected by the decline. We therefore genotyped 13 polymorphic mic…	2	4	183	198	2002	Avian Science
21	Aquila chrysaetos	10	Eaton, Mark A.; Dillon, Ian A.; Stirling-Aird, Patrick K.; Whitfield, D. Philip								Status of Golden Eagle Aquila chrysoetos in Britain in 2003					2					Capsule The third complete survey of Golden Eagles in Britain found 442 pairs.Aim To investigate the population size, distribution and breeding success of Golden Eagles in Britain, for comparison with similar surveys in 1982-83 and 1992.Methods All known home-ranges were surveyed between January and August 2003, to record Golden Eagle presence, breeding attempts and productivity using a three-vis…	88	4	1029	1039	2007	JOURNAL OF MAMMALOGY
22	Aquila chrysaetos	10	Fielding, A.H.; Fielding, A.H.; Haworth, P.F.; Morgan, D.H.; Thompson, D.B.A.; Whitfield, D.P.						Thompson, D.B.A.; Redpath, S.M.; Fielding, A.H.; Marquiss, M.; Galbraith, C.A.		The impact of golden eagles (Aquila chrysaetos) on a diverse bird of prey assemblage.													221	243	2003	Birds of prey in a changing environment. National Heritage of Scotland Vol 12.
23	Aquila chrysaetos	10	WATSON, A; ROTHERY, P								REGULARITY IN SPACING OF GOLDEN EAGLE AQUILA-CHRYSAETOS NESTS USED WITHIN YEARS IN NORTHEAST SCOTLAND											130	4	465	480	2006	BIOLOGICAL CONSERVATION
24	Aquila chrysaetos	10	Whitfield, D. Philip; Fielding, Alan H.; McLeod, David R. A.; Morton, Keith; Stirling-Aird, Patrick; Eaton, Mark A.								Factors constraining the distribution of Golden Eagles Aquila chrysaetos in Scotland					2					Capsule Between 1992 and 2003 persecution appeared to be the main influential factor.Aims To utilize temporal changes in the distribution and occupation of Golden Eagle territories in Scotland between the 1992 and 2003 national censuses to assess potential causes of regional and national population trends, by examining spatial associations with a number of potential constraints on the population.…	54		199	211	2007	BIRD STUDY
25	Aquila chrysaetos	9	Grant, J.R.; McGrady, M.J.								Dispersal of golden eagles Aquila chrysaetos in Scotland.										Two nestling Golden Eagles Aquila chrysaetos were radio-tracked from fledging until the birds were unable to be located. In addition two other free flying young birds - one juvenile and one sub-adult - were opportunistically caught, radio-tagged and tracked. After fledging one nestling stayed in the home range for six months and then left, while the other stayed for four months and made excursion…	19	3	169	174	1999	Ringing & Migration
26	Aquila chrysaetos	9	McLeod, DRA; Whitfield, DP; McGrady, MJ								Improving prediction of Golden Eagle (Aquila chrysaetos) ranging in western Scotland using GIS and terrain modeling										A current model for predicting range use of Golden Eagles (Aquila chrysaetos) in western Scotland is derived from observed ranging behavior, a central point, and elevation. An improvement to this model is described that incorporates let rain features. Ridges are modeled as an assumed surrogate for deflected updrafts of air currents. Golden Eagles preferred areas close to ridges and close to the c…	36	1	70	77	2002	JOURNAL OF RAPTOR RESEARCH
27	Aquila chrysaetos	9	Whitfield, DP; Fielding, AH; McLeod, DRA; Haworth, PF; Watson, J								A conservation framework for the golden eagle in Scotland: Refining condition targets and assessment of constraint influences										Conservation strategies have three elements: species protection, site protection and, the most challenging component, conservation in the wider environment. Watson and Whitfield [Watson, J., Whitfield, P., 2002. A conservation framework for the golden eagle Aquila chrysaetos in Scotland. journal of Raptor Research 36(1 Suppl.), 41-49.] proposed a conservation framework for the golden eagle in Sco…	128	3	406	408	1986	IBIS
28	Aquila chrysaetos	7	Whitfield, D. Philip; Fielding, Alan H.; Gregory, Mike J. P.; Gordon, A. G.; McLeod, David R. A.; Haworth, Paul F.								Complex effects of habitat loss on Golden Eagles Aquila chrysaetos										The development of commercial forests presents potential threats to large raptors that rely on prey caught in open country. We examined the effect of afforestation of breeding habitat used by a population of Golden Eagles Aquila chrysaetos in Scotland where, over the last 50 years, extensive stands of exotic conifers have been planted. Using data for 31 years on territory occupancy and breeding s…	149	1	26	36	2007	IBIS
29	Aquila chrysaetos	5	Evans, Richard J.; Broad, Roger A.; Duffy, Kevin; MacLennan, Alison M.; Bainbridge, Ian P.; Mudge, Greg P.						Helander, Bjorn		Re-establishment of a breeding population of white-tailed eagles in Scotland.										Between 1975 and 1998, 141 juvenile White-tailed Eagles Haliaeetus albicilla were released in Scotland to re-establish a breeding population. The donor population was centred on Bodo in northern Norway. Between 1975 and 1985, 82 birds were released on the island of Rum. The first eggs were laid in 1983 and the first successful breeding attempt occurred in 1985. Between 1982 and 1992, the populati…	151	2	255	264	2009	IBIS
30	Aquila chrysaetos	5	Gregory, MJP; Gordon, AG; Moss, R								Impact of nest-trapping and radio-tagging on breeding Golden Eagles Aquila chrysaetos in Argyll, Scotland										Golden Eagles Aquila chrysaetos in South Argyll, Scotland, have been monitored annually since 1964. Other workers trapped and radiotagged breeding adults there for a separate study during 1991-1996. Our analysis of our monitoring data shows that the trapping and tagging was followed by reduced reproductive success (proportion of territories producing young each year). Also, nest-sites where adult…	53		265	273	2006	BIRD STUDY
31	Aquila chrysaetos	5	RATCLIFFE, PR; ROWE, JJ								GOLDEN EAGLE (AQUILA-CHRYSAETOS) KILLS AN INFANT ROE DEER (CAPREOLUS-CAPREOLUS)											145	1	113	119	2003	IBIS
32	Aquila chrysaetos	4	Fielding, Alan; Whitfield, D. Phil; McLeod, David R.A.; McGrady, Mike J.; Haworth, Paul F.						Thompson, D.B.A.; Redpath, S.M.; Fielding, A.H.; Marquiss, M.; Galbraith, C.A.		Modelling the impact of land use change on golden eagles (Aquila chrysaetos).											6	4	1047	1050	2006	MOLECULAR ECOLOGY NOTES
33	Aquila chrysaetos	4	Haworth, Paul F.; McGrady, Michael J.; Whitfield, D. Philip; Fielding, Alan H.; McLeod, David R. A.								Ranging distance of resident Golden Eagles Aquila chrysaetos in western Scotland according to season and breeding status					3					Capsule Home-range of resident pairs of Golden Eagle was usually smaller during a successful breeding season than during winter and during an unsuccessful breeding season.Aims To examine how Golden Eagles use space around their nests with respect to season and breeding status, and to compare home-range-use between a high and a low density region.Methods Nine adults in six mainland Argyll ranges w…	189	DEC	532	535	1979	JOURNAL OF ZOOLOGY
34	Aquila chrysaetos	4	Madders, M; Walker, D								Golden Eagles in a multiple land-use environment: A case study in conflict management										Sheep farming and forestry dominate land use over much of western Scotland, and these activities have important implications for the nesting density and reproductive success of Golden Eagles (Aquila chrysaetos). In some areas, secondary land uses such as wind energy developments and opencast quarrying are being considered. The additive effects of such developments have prompted concern among cons…			149	161	2003	Birds of prey in a changing environment. National Heritage of Scotland Vol 12.
35	Aquila chrysaetos	4	Watson, J.; Fielding, A.H.; Whitfield, D.P.; Broad, R.A.; Haworth, P.F.; Nellist, K.; Crane, K.; Macdonald, E.J.						Thompson, D.B.A.; Redpath, S.M.; Fielding, A.H.; Marquiss, M.; Galbraith, C.A.		Golden eagle (Aquila chrysaetos) breeding performance in relation to climate in western Scotland during the period 1981-2000.											37	6	642	644	2006	JOURNAL OF AVIAN BIOLOGY
36	Aquila chrysaetos	4	Whitfield, D. P.; Reid, Robin; Haworth, Paul F.; Madders, Mike; Marquiss, Mick; Tingay, Ruth; Fielding, Alan H.								Diet specificity is not associated with increased reproductive performance of Golden Eagles Aquila chrysaetos in Western Scotland										Amongst raptor species, individuals with specialized diets are commonly observed to have higher reproductive output than those with general diets. A suggested cause is that foraging efficiency benefits accrue to diet specialists. This diet specificity hypothesis thus predicts that diet breadth and reproductive success should be inversely related within species. We highlight, however, that a prey …	133	2	115	120	1991	IBIS
37	Aquila chrysaetos	4	Whitfield, D.P.; Evans, R.J.; Broad, R.A.; Fielding, A.H.; Haworth, P.F.; Madders, M.; McLeod, D.R.A.								Are reintroduced white-tailed eagles in competition with golden eagles?										Since the White-tailed Eagle was reintroduced into Scotland in 1975, it has been predicted that inter-specific competition for food would displace the Golden Eagle from many coastal ranges. We examined the effects of White-tailed Eagle activity on the breeding performance of Golden Eagle ranges on Mull, where both species occur at relatively high density for Scotland. There was no consistent effe…			323	339	2003	Birds of prey in a changing environment. National Heritage of Scotland Vol 12.
38	Aquila chrysaetos	3	Hanley, Nick; Czajkowski, Mikolaj; Hanley-Nickolls, Rose; Redpath, Steve				Redpath, Steve/B-4640-2012; Hanley, Nick/C-1759-2012; Hanley-Nickolls, Jessica Rose/F-3097-2013	Hanley-Nickolls, Jessica Rose/0000-0002-7017-3834			Economic values of species management options in human-wildlife conflicts Hen Harriers in Scotland										In this paper we use the choice experiment method to investigate public preferences over alternative management regimes for a top-level predator in UK moorlands the Hen Harrier These birds are at the centre of a conflict between moorland managers and conservation organisations Illegal killing of Hen Harriers on moorland managed for Red Grouse is considered to be one of the main factors limiting h…	70	1	107	113	2010	ECOLOGICAL ECONOMICS
39	Aquila chrysaetos	3	Love, John A.						Helander, Bjorn		A history of the white-tailed sea eagle in Scotland.										Archaeology, placenames and documentary evidence clearly reveals that the Sea Eagle was once a common and widespread bird in the British Isles. Habitat loss and persecution reduced it to west and north coast strongholds in the 19th century leading to its ultimate extinction as a breeding bird by 1916. The localities of both Golden and Sea Eagle clutches taken in the past indicate that the two spe…			39	50	2003	Sea Eagle 2000. Proceedings from the International Sea Eagle Conference in Bjorko, Sweden, 13-17 September 2000.
40	Aquila chrysaetos	3	McGrady, MJ; Grant, JR								The use of a power snare to capture breeding golden eagles											30	1	28	31	1996	JOURNAL OF RAPTOR RESEARCH
41	Aquila chrysaetos	3	Watson, Jeff						Meyburg, B.-U.; Chancellor, R.D.; Ferrero, J.J.		Should golden eagles Aquila chrysaetos be food generalists or specialists?													251	261	1998	Holarctic birds of prey. Proceedings of an international conference. Actas del Congreso Internacional sobre Rapaces del Holartico. Badajoz, Extremadura (Spain), 17-22 Abril 1995.
42	Aquila chrysaetos	2	Madders, Mike; Marquiss, Mick						Helander, Bjorn		A comparison of the diet of white-tailed eagles and golden eagles breeding in adjacent ranges in west Scotland.										The recent re-establishment of White-tailed Eagles in Scotland has led to speculation about the possible effects on the population of Golden Eagles, in particular whether or not the two species might compete directly for food. On the Island of Mull, White-tailed Eagles have established territories in areas occupied by Golden Eagles. To judge from prey remains and oral pellets collected in these a…			289	295	2003	Sea Eagle 2000. Proceedings from the International Sea Eagle Conference in Bjorko, Sweden, 13-17 September 2000.
43	Aquila chrysaetos	2	Pout, A.C.								Seasonal differences in pellet remains from golden eagles in the Isle of Harris.										An analysis of prey remains in pellets collected from 4 pairs of Golden Eagles in the Isle of Harris revealed that 'live prey' remains were more frequently found in pellets from the prebreeding period than from later in the season, and in pellets collected from an active nest site than from other sites within the same range during the fledging period. It is argued that these differences arise fro…	19	4	239	243	1998	Scottish Birds
44	Aquila chrysaetos	1	Crane, Ken; Nellist, Kate						Thompson, D.B.A.; Redpath, S.M.; Fielding, A.H.; Marquiss, M.; Galbraith, C.A.		Winter ranging behaviour and social interactions in golden eagles (Aquila chrysaetos).											89	3	229	232	2012	ORNIS FENNICA
45	Aquila chrysaetos	1	Evans, Richard J.; Pearce-Higgins, James; Whitfield, D. Philip; Grant, Justin R.; MacLennan, Alison; Reid, Robin								Comparative nest habitat characteristics of sympatric White-tailed Haliaeetus albicilla and Golden Eagles Aquila chrysaetos in western Scotland										Capsule Golden and White-tailed Eagles selected different habitats for nesting.Aim To investigate differences in nesting habitat used by sympatrically breeding eagles in western Scotland, following reintroduction of White-tailed Eagles from 1975 onwards.Methods Nest-site locations from national surveys in 2003-05 were entered into a geographical information system (GIS) in order to measure a set …	59	3	335	349	2012	BIRD STUDY
46	Aquila chrysaetos	1	Mc Grady, M.J.; Grant, J.G.; McLeod, D.R.A.						Meyburg, B.-U.; Chancellor, R.D.; Ferrero, J.J.		A preliminary analysis of the relation between land cover and golden eagle Aquila chrysaetos ranging behaviour in Argyll, western Scotland.											57	4	473	482	2010	BIRD STUDY
47	Aquila chrysaetos	0	Evans, Richard J.; O'Toole, Lorcan; Whitfield, D. Philip								The history of eagles in Britain and Ireland: an ecological review of placename and documentary evidence from the last 1500 years										Capsule The loss of eagles from large tracts of lowland and upland habitat in Britain and Ireland over the last 1500 years is attributed to human activity.Aim To estimate changes in past distribution and population size of Britain and Ireland's two native eagle species.Methods Placenames suggesting the past presence of eagles were categorized according to modern knowledge of the species' ecology.…			245	248	2003	Birds of prey in a changing environment. National Heritage of Scotland Vol 12.
48	Aquila chrysaetos	0	Evans, Richard; Reid, Robin; Whitfield, Phil								Pre-First World War persistence of a Golden Eagle population in the Outer Hebrides.											33	1	34	36	2013	Scottish Birds
49	Aquila chrysaetos	0	Gregory, Mike								Wind farms and golden eagles: the Argyll experience - an update.											30	2	129	130	2010	Scottish Birds
50	Aquila chrysaetos	0	Gregory, Mike								Windfarms and golden eagles, the Argyll experience.											84		14	15	2007	Scottish Bird News
51	Aquila chrysaetos	0	Jardine, David C.; Peacock, Mike A.; McGowan, Robert Y.; Maw, Crystal								Natural predation of golden eagles.											31	3	226	228	2011	Scottish Birds
52	Aquila chrysaetos	0	McGrady, Michael J.; McLeod, David R.A.; Petty, Steve J.; Grant, Justin R.; Bainbridge, Ian P.								Golden eagles and forestry.											292		8pp.	8pp.	1997	Forestry Commission Research Information Note
53	Aquila chrysaetos	0	Morris, Sean								Breeding success of golden eagles on the Isle of Rum 1995-2007.											28		44	44	2008	Scottish Birds
54	Aquila chrysaetos	0	Ramsey, A. D.; Nevin, O. T.; Armstrong, R.								Golden eagle (Aquila chrysaetos) restoration in the Lake District National Park; an investigation of public demand and economic benefits											1	1	49	50	2008	AVIAN BIOLOGY RESEARCH
55	Aquila chrysaetos	0	Walker, David								Correspondence: models of golden eagle home ranges.											50		5	5	1998	Scottish Bird News
56	Aquila chrysaetos	0	Watson, Adam; Rae, Stuart; Payne, Sandy								Mirrored sequences of colonisation and abandonment by pairs of Golden Eagles Aquila chrysaetos										We report colonisation by extra breeding pairs of Golden Eagles, and subsequent abandonments, in part of northeast Scotland during 1895-1985. The number of pairs rose from three in 1895-1937 to eight by 1948, and then fell to four during 1959-71 in reverse of the colonisation sequence. This fits the concept of hierarchic quality of habitat used, or of bird quality. Possible mechanisms to explain …			263	270	1998	Holarctic birds of prey. Proceedings of an international conference. Actas del Congreso Internacional sobre Rapaces del Holartico. Badajoz, Extremadura (Spain), 17-22 Abril 1995.
57	Aquila chrysaetos	0	Whitfield, P.								Golden eagle Aquila chrysaetos ecology and conservation issues.											132		i	iv, 1-24	2000	Scottish Natural Heritage Review
1	Ardea alba	0	Anderson, Kevin; Clarke, Simon; Lucken, Roger								Nesting behaviour of the first breeding Great White Egrets in Britain.										The first recorded breeding of Great White Egrets Ardea alba in Britain occurred at Shapwick Heath NNR, Somerset, in 2012. Breeding behaviour was first noticed at one site in early April and at a second site nearby in late May. The first of three chicks at nest I hatched on about 2nd May; all three chicks from this nest fledged, the first on 9th June. At nest 2, two chicks hatched, the first on a…	106	5	258	263	2013	British Birds
2	Ardea alba	0	Holt, Chas								The changing status of the Great White Egret in Britain.										Records of the Great White Egret Ardea alba have increased significantly in Britain in the last 20 years. The species now occurs throughout the year in some parts of the country, and is sufficiently numerous for a population trend based on WeBS Core Counts to be produced. The source of the increase is probably the expanding populations in neighbouring countries, particularly the Netherlands - whe…	106	5	246	257	2013	British Birds
1	Ardea cinerea	97	Besbeas, P; Freeman, SN; Morgan, BJT; Catchpole, EA				Freeman, Stephen/E-7267-2012				Integrating mark-recapture-recovery and census data to estimate animal abundance and demographic parameters										In studies of wild animals, one frequently encounters both census and mark-recapture-recovery data. We show how a state-space model for census data in combination with the usual multinomial-based models for ring-recovery data provide estimates of productivity not available from either type of data, alone. The approach is illustrated on two British bird species. For the lapwing; we calibrate how i…	58	3	540	547	2002	BIOMETRICS
2	Ardea cinerea	35	COOKE, AS; BELL, AA; PRESTT, I								EGG-SHELL CHARACTERISTICS AND INCIDENCE OF SHELL BREAKAGE FOR GREY HERONS ARDEA-CINEREA EXPOSED TO ENVIRONMENTAL POLLUTANTS											56	2	479	493	1987	JOURNAL OF ANIMAL ECOLOGY
3	Ardea cinerea	28	Wienburg, CL; Shore, RF				Shore, Richard/A-2638-2012				Factors influencing liver PCB concentrations in sparrowhawks (Accipiter nisus), kestrels (Falco tinnunculus) and herons (Ardea cinerea) in Britain										Large scale temporal and spatial changes in the exposure of terrestrial vertebrates to PCBs have been monitored in the UK by measuring liver residues in sparrowhawks (Accipiter nisus), kestrels (Falco tinnunculus) and grey herons (Ardea cinerea) from throughout the country. Residues in the three species are typically characterised by large intra- and inter-specific variation. Data for 306 sparrow…	132	1	41	50	2004	ENVIRONMENTAL POLLUTION
4	Ardea cinerea	27	BOUMPHREY, RS; HARRAD, SJ; JONES, KC; OSBORN, D								POLYCHLORINATED BIPHENYL CONGENER PATTERNS IN TISSUES FROM A SELECTION OF BRITISH BIRDS										A large selection of polychlorinated biphenyl (PCB) congeners was determined in tissues from several British bird species including three sea birds, four birds of prey, and herons (Ardea cinerea). The congener ''signatures'' were consistent between different tissues of the same individual, but varied within and between species. Congeners 138, 153, and 180 were dominant in most samples. Neverthele…	25	3	346	352	1993	ARCHIVES OF ENVIRONMENTAL CONTAMINATION AND TOXICOLOGY
5	Ardea cinerea	25	Adams, CE; Maitland, PS								The ruffe population of Loch Lomond, Scotland: Its introduction, population expansion, and interaction with native species										The ruffe (Gymnocephalus cernuus), never before recorded in Scotland, was discovered in Loch Lomond in 1982. During the 1980s ruffe became well established and expanded its range throughout the loch and through the slow-flowing influent and effluent tributaries, only being excluded from tributaries with high flow rates. Recoveries of fish entrained at a pumping station, abstracting water for dome…	24	2	249	262	1998	JOURNAL OF GREAT LAKES RESEARCH
6	Ardea cinerea	15	ADAMS, CE; MITCHELL, J								THE RESPONSE OF A GREY HERON ARDEA-CINEREA BREEDING COLONY TO RAPID CHANGE IN PREY SPECIES					1					The fish community of Loch Lomond has changed rapidly in recent years following introductions of 5 new species of fish. The response of the most abundant resident, piscivorous bird, the Grey Heron Ardea cinerea, to the sudden arrival and rapid population expansion of potential prey species is evaluated here. The relative rate of predation of fish by herons during the breeding season and the size …	42		44	49	1995	BIRD STUDY
7	Ardea cinerea	14	MARQUISS, M; LEITCH, AF								THE DIET OF GRAY HERONS ARDEA-CINEREA BREEDING AT LOCH LEVEN, SCOTLAND, AND THE IMPORTANCE OF THEIR PREDATION ON DUCKLINGS											132	4	535	549	1990	IBIS
8	Ardea cinerea	13	Harris, Catriona M.; Calladine, John R.; Wernham, Chris V.; Park, Kirsty J.								Impacts of piscivorous birds on salmonid populations and game fisheries in Scotland: a review										The Scottish populations of salmonids are important both ecologically and economically. Game fisheries for Atlantic salmon Salmo salar, sea trout Salmo trutta trutta and brown trout Salmo trutta fari are all highly acclaimed and generate substantial levels of income for Scotland, but many populations are in decline and efforts are being made to ensure the future sustainability of these species. T…	14	4	395	411	2008	WILDLIFE BIOLOGY
9	Ardea cinerea	12	Thompson, Helen M.; Fernandes, Alwyn; Rose, Martin; White, Shaun; Blackburn, Adrian				Thompson, Helen/H-7753-2013	Thompson, Helen/0000-0001-5137-5214			Possible chemical causes of skeletal deformities in grey heron nestlings (Ardea cinerea) in North Nottinghamshire, UK										Dead and deformed grey heron (Ardea cinerea) chicks were reported at a large heronry in North Nottinghamshire, UK between 1996 (when systematic visits to the heronry started) and 2002. Many of the birds died for no obvious reason but deformities in others included multiple fractures of the tarsus and tibia and metacarpal bones (angel wings). This study aimed to investigate possible chemical cause…	146	2	323	334	2004	IBIS
10	Ardea cinerea	11	Marchant, JH; Freeman, SN; Crick, HQP; Beaven, LP				Freeman, Stephen/E-7267-2012				The BTO Heronries Census of England and Wales 1928-2000: new indices and a comparison of analytical methods										A census of Grey Heron Ardea cinerea colonies has been made annually by volunteer observers in England and Wales since a first national survey in 1928. This data set has recently been thoroughly upgraded and here we apply a new method of indexing Heron population changes to produce a new 73-year time-series, the longest time-series describing the abundance of any breeding bird in the world. The i…	65	3	400	409	2006	CHEMOSPHERE
11	Ardea cinerea	9	HEWSON, R								USE OF SALMONID CARCASSES BY VERTEBRATE SCAVENGERS					1					The use of salmon Salmo salar carrion by otters Lutra lutra and other scavengers along the River Dee in north-east Scotland was studied by radio-tagging and individual marking of fish carcasses. More carcasses were available on the Dee than on tributary streams used for spawning, indicating that salmon returned to the river after spawning and died there. The amount of salmon carrion available to …	235		53	65	1995	JOURNAL OF ZOOLOGY
12	Ardea cinerea	7	MARQUISS, M								GREY HERONS ARDEA-CINEREA BREEDING IN SCOTLAND - NUMBERS, DISTRIBUTION, AND CENSUS TECHNIQUES					3						36		181	191	1989	BIRD STUDY
13	Ardea cinerea	5	Forman, DW								An assessment of the local impact of native predators on an established population of British water voles (Arvicola terrestris)					3					There is a considerable amount of literature on the diet and effect of feral American mink Mustela vison on the distribution and abundance of water voles Arvicola terrestris in Britain. Few recent studies, however, have attempted to examine the occurrence of water voles in the diets of native predators. Fox Vulpes vulpes scat and grey heron Ardea cinerea pellets were collected during winter 2003-…	266		221	226	2005	JOURNAL OF ZOOLOGY
14	Ardea cinerea	4	Adams, CE						Greenstreet, SPR; Tasker, ML		The impact of introductions of new fish species on predator-prey relationships in freshwater Lakes											96	2	86	86	2003	British Birds
15	Ardea cinerea	4	Carss, DN; Elston, DA				Carss, David/A-3090-2013; Elston, David/H-8199-2013				Patterns of association between algae, fishes and grey herons Ardea cinerea in the rocky littoral zone of a Scottish sea loch										The distribution of dominant algae, Fucus vesiculosus and Ascophyllum nodosum, the associated fish community, and the spatial and temporal distributions of the main piscivorous predator, the grey heron Ardea cinerea, were studied on the rocky intertidal zone of Loch Etive, a sea loch on the Scottish west coast. Fucus- and Ascophyllum-dominated shores were not distributed randomly around the shore…	58	2	265	277	2003	ESTUARINE COASTAL AND SHELF SCIENCE
16	Ardea cinerea	3	Bowey, Keith								Grey heron catching common starling in flight.											90	3	112	113	1997	British Birds
17	Ardea cinerea	3	McCanch, Norman								Grey heron choking on little grebe.											85	1	25	31	1986	COMPARATIVE BIOCHEMISTRY AND PHYSIOLOGY C-PHARMACOLOGY TOXICOLOGY & ENDOCRINOLOGY
18	Ardea cinerea	2	Carss, DN; Marquiss, M				Carss, David/A-3090-2013		Greenstreet, SPR; Tasker, ML		The influence of a fish farm on grey heron Ardea cinerea breeding performance											11	1	12	20	1998	Birding World
19	Ardea cinerea	2	Furness, Robert W.						Black, Kenneth D.		Interactions between seabirds and aquaculture in sea lochs.													133	141	1996	AQUATIC PREDATORS AND THEIR PREY
20	Ardea cinerea	0	Allen, John								Ospreys killing a grey heron.											25		56	56	2005	Scottish Birds
21	Ardea cinerea	0	Batty, R.E.; Forbes, L.								Grey heron exploiting behaviour of great cormorant, and attempting to rob it.											90	3	112	112	1997	British Birds
22	Ardea cinerea	0	Best, Dick; Lawson, Becki						Mullineaux, Elizabeth; Best, Dick; Cooper, John E.		Wading birds, including herons.													214	218	2003	BSAVA manual of wildife casualties.
23	Ardea cinerea	0	Calvert, R.F.	Calvert, R.F.							Wildlife and Countryside Act 1981: licensed shooting of piscivorous birds. Annual review of 2002-2003 season.													1	11	2004	Wildlife and Countryside Act 1981: licensed shooting of piscivorous birds. Annual review of 2002-2003 season.
24	Ardea cinerea	0	Christmas, Stephen E.; Halton, Wesley J.; Brides, Kane; Sharp, Stuart P.								Predominantly northward dispersal of Grey Herons Ardea cinerea from a heronry in Greater Manchester, UK.										In 1988 a ringing study was commenced with the aim of determining patterns of dispersal from a large heronry in Greater Manchester, north-west England. Between 1988 and 2008, over 900 nestling Grey Herons Ardea cinerea were ringed at the heronry, rings from 53 of which were subsequently recovered. The overall annual recovery rate was 5.7% but this declined significantly from 7.5% between 1988 and…	25	1	52	55	2010	Ringing & Migration
25	Ardea cinerea	0	Coath, Martin								Grey heron eating rabbit.											95	2	85	85	2002	British Birds
26	Ardea cinerea	0	Coleman, A.E.; Coleman, J.T.								Movements of the grey heron to and from the WMBC area with special reference to breeding success at the Gailey heronry during 1960-70 and 1980-90.											61		20	24	1995	West Midland Bird Club Annual Report
27	Ardea cinerea	0	Cooper, Steve								Piratical feeding and unusual diet of grey herons.											98	7	377	377	2005	British Birds
28	Ardea cinerea	0	Davis, Peter								Common ravens and grey herons.											103	4	244	245	2010	British Birds
29	Ardea cinerea	0	Dougall, Tom								Grey heron attracted to injured rabbit.											29	1	33	33	2009	Scottish Birds
30	Ardea cinerea	0	Forrest, C.; Langston, R.								Effects of the M6 motorway widening on Gailey heronry.											141		1	8	1997	BTO Research Report
31	Ardea cinerea	0	Gladwin, Tom								Mixed colony of great cormorants and grey herons in Hertfordshire.											101	5	261	261	2008	British Birds
32	Ardea cinerea	0	Hewson, R.								Scavenging by birds upon salmon carcasses during the spawning season.										Scavenging of Salmon by birds on the river Dee in north east Scotland was studied during 6 spawning seasons. Spawning took place mainly between early November and the end of January. Otters brought ashore, usually at selected landing places, carcasses of Salmon which they had killed or which had died after spawning. Other carcasses were deposited by changes in water level. Birds scavenged 21% to …	23	1	27	31	2002	Scottish Birds
33	Ardea cinerea	0	Jardine, D.C.; Clarke, J.; Clarke, P.M.								A long-term breeding study of grey herons on Colonsay and Oronsay, Argyll.										The population of Grey Herons on Colonsay and Oronsay, Argyll, was studied between 1982 and 2009. During this period ten different heronries were used: nine on Colonsay and one on Oronsay. Each year there was one principal heronry with up to four satellite sites. The total number of pairs varied between ten and 20 pairs, making this the highest reported density of breeding herons in Scotland Bree…	30	1	14	20	2010	Scottish Birds
34	Ardea cinerea	0	Lawson, D.H.								Grey heron killed by great skua.											20	1	40	41	1999	Scottish Birds
35	Ardea cinerea	0	Marchant, John								Charting the success of UK herons.										The long-running BTO Heronries Census was supplemented by a highly successful special survey in 2003, the first such survey since 1985. John Marchant discusses some of the results that are now emerging.	8		160	163	2007	Bird Populations
36	Ardea cinerea	0	Marchant, John								Heronries census - results from 2000.										John Marchant reports on the current status of the Grey Heron in the UK and on the Heronries Census, now in its 74th season.	6		105	106	2002	Bird Populations
37	Ardea cinerea	0	Marchant, John								Herons in 1999.										BTO members have kept Grey Heron numbers under annual surveillance for most of the 20th century. John Marchant reports on the latest developments.	6		62	63	2002	Bird Populations
38	Ardea cinerea	0	McCallum, L.T.								Female mallard attacking grey heron in defence of young.											94	2	88	89	2001	British Birds
39	Ardea cinerea	0	Mee, Allan; Dougall, Tom								Grey heron predating white-throated dipper.											22	2	104	105	2001	Scottish Birds
40	Ardea cinerea	0	Moss, Richard								Grey herons nesting on the ground.											95	8	391	392	2002	British Birds
41	Ardea cinerea	0	Prytherch, Robin J.; Warden, David; Klee, Chris								Common raven nesting with grey herons.											102	11	638	638	2009	British Birds
42	Ardea cinerea	0	Sparks, John								Grey heron preying on rabbit and common kingfisher.											95	2	85	85	2002	British Birds
43	Ardea cinerea	0	Strangeman, P.J.								Grey heron eating rabbit.											95	8	392	392	2002	British Birds
44	Ardea cinerea	0	Toyne, EP; Ostroznik, H								Notes on Northern Goshawks nesting in an abandoned heronry in Wales											31	1	89	89	1997	JOURNAL OF RAPTOR RESEARCH
45	Ardea cinerea	0	WELCH, RC								COLEOPTERA AND OTHER INVERTEBRATES FROM NESTS OF HERONS ARDEA-CINEREA IN KENT											119	4	512	515	1977	IBIS
46	Ardea cinerea	0							Holmes, J.S.; Clement, P.		Fish-eating birds: proceedings of a seminar to review status, interactions with fisheries and licensing issues.											15		i	vi, 1-17	1996	UK Nature Conservation
1	Ardea purpurea	0	Elkins, N.; Nisbet, C.								Purple heron, nr Letham, Fife, April 2011 - the first Fife record.											31	3	266	268	2011	Scottish Birds
2	Ardea purpurea	0	Mayer, Edward								Purple heron following the plough.											95	2	85	86	2002	British Birds
3	Ardea purpurea	0	Palmer, Phil								Purple heron fishing in deep water.											99	5	265	265	2006	British Birds
1	Arenaria interpres	72	Beale, CM; Monaghan, P				Monaghan, Pat/A-4271-2008				Behavioural responses to human disturbance: a matter of choice?					5					The strength of an animal's behavioural response to human presence has often been used as an index of an animal's susceptibility to disturbance. However, if behavioural responsiveness is positively related to the animal's condition, this may be an inappropriate index, as individuals showing little or no response may in fact be those with most to lose from changing their behaviour. We tested the l…	68		1065	1069	2004	ANIMAL BEHAVIOUR
2	Arenaria interpres	35	WHITFIELD, DP								SPARROWHAWKS ACCIPITER-NISUS AFFECT THE SPACING BEHAVIOR OF WINTERING TURNSTONE ARENARIA-INTERPRES AND REDSHANK TRINGA-TOTANUS											130	2	284	287	1988	IBIS
3	Arenaria interpres	31	METCALFE, NB; FURNESS, RW				Metcalfe, Neil/C-5997-2009	Metcalfe, Neil/0000-0002-1970-9349			SURVIVAL, WINTER POPULATION STABILITY AND SITE FIDELITY IN THE TURNSTONE ARENARIA-INTERPRES											32	NOV	207	214	1985	BIRD STUDY
4	Arenaria interpres	27	METCALFE, NB				Metcalfe, Neil/C-5997-2009	Metcalfe, Neil/0000-0002-1970-9349			VARIATION IN WINTER FLOCKING ASSOCIATIONS AND DISPERSION PATTERNS IN THE TURNSTONE ARENARIA-INTERPRES					3						77	41335	193	201	1996	BIOLOGICAL CONSERVATION
5	Arenaria interpres	27	Smart, J; Gill, JA								Non-intertidal habitat use by shorebirds: a reflection of inadequate intertidal resources?										Many species of shorebird typically forage almost exclusively on intertidal habitats. When such strongly maritime species choose to forage on non-intertidal habitats, it may either be a response to deteriorating intertidal conditions or to the discovery of more profitable resources in non-intertidal areas. Methods which allow distinction between these two will clearly be important for identifying…	111	3	359	369	2003	BIOLOGICAL CONSERVATION
6	Arenaria interpres	27	WHITFIELD, DP								INDIVIDUAL FEEDING SPECIALIZATIONS OF WINTERING TURNSTONE ARENARIA-INTERPRES											209		385	403	1986	JOURNAL OF ZOOLOGY
7	Arenaria interpres	26	Burton, NHK; Evans, PR; Robinson, MA								Effects on shorebird numbers of disturbance, the loss of a roost site and its replacement by an artificial island at Hartlepool, Cleveland										Hartlepool West Harbour contains nationally important high water roosts for wintering shorebirds, including purple sandpipers Calidris maritima, turnstones Arenaria interpres and knots Calidris canutus. Redevelopment of the site, starting in summer 1991, replaced the dilapidated stone pier used formerly as the main roost site with a new pier and an island built specially for the birds. Maximum nu…	59	1	193	211	1990	JOURNAL OF ANIMAL ECOLOGY
8	Arenaria interpres	21	Rehfisch, MM; Austin, GE; Freeman, SN; Armitage, MJS; Burton, NHK								The possible impact of climate change on the future distributions and numbers of waders on Britain's non-estuarine coast										The relationship between weather and wader distributions on non-estuarine coasts is described and used to predict how future wader distributions may respond to climate change. The distributions of eight out of nine species of wader commonly wintering on the non-estuarine coasts of Britain altered between two similar surveys, in 1984/85 and 1997/98, that covered 78% and 38% of Britain's 12 594 km …	146		70	81	2004	IBIS
9	Arenaria interpres	20	Rehfisch, MM; Insley, H; Swann, B								Fidelity of overwintering shorebirds to roosts on the Moray Basin, Scotland: Implications for predicting impacts of habitat loss										Recommendations exist for reclaiming parts of the Special Protection Areas (SPAs) within the Moray Basin, Scotland that hold nine and six species of overwintering shorebird in nationally and internationally important numbers, respectively. Over 80% of estuaries in Britain are already affected by landclaim. To manage the effect of landclaim on shorebirds it is necessary to understand how they use …	146		40	47	2004	IBIS
10	Arenaria interpres	19	Kendall, MA; Burrows, MT; Southward, AJ; Hawkins, SJ				Burrows, Michael/D-9844-2013				Predicting the effects of marine climate change on the invertebrate prey of the birds of rocky shores										By the end of the 21st century models of climate change predict that the air temperature over most of the British Isles will increase by between 2 and 3degreesC and sea-level will rise by 40-50 cm. Over that period it will become windier and mean wave height will increase, as will the frequency of storms. These changes in climate and weather will impact the intertidal zone of the UK and will caus…	91	1	53	70	2003	ARDEA
11	Arenaria interpres	14	Burton, NHK; Evans, PR								Survival and winter site-fidelity of turnstones Arenaria interpres and Purple Sandpipers Calidris maritima in northeast England					1					The win ter site-fidelity and annual survival of Turnstones Arenaria interpres and Purple Sandpipers Calidris maritima eons investigated at Hartlepool, Cleveland using samples of individually colour-ringed birds. All colour-ringed Purple Sandpipers and a high proportion of colour-ringed Turnstones present at the start of winter were resident in the study area throughout the winter. All Purple San…	44		35	44	1997	BIRD STUDY
12	Arenaria interpres	14	WHITFIELD, DP								THE SOCIAL SIGNIFICANCE OF PLUMAGE VARIABILITY IN WINTERING TURNSTONE ARENARIA-INTERPRES					2						36		408	415	1988	ANIMAL BEHAVIOUR
13	Arenaria interpres	11	YATES, MG; GOSSCUSTARD, JD								A COMPARISON BETWEEN HIGH WATER AND LOW WATER COUNTS OF SHOREBIRDS ON THE WASH, EAST ENGLAND					3					Comparisons are made between counts of shorebirds at high water roosts and low water feeding grounds on the Wash, east England. During autumn and winter 1985-87, Shelduck, Tadorna tadorna, Oystercatcher, Haematopus ostralegus, Ringed Plover, Charadrius hiaticula, Grey Plover, Pluvialis squatarola, Knot, Calidris canutus, Dunlin, Calidris alpina, Bar-tailed Godwit, Limosa lapponica, Curlwe, Numeni…	38		179	187	1991	BIRD STUDY
14	Arenaria interpres	8	FERNS, PN				Ferns, Peter/A-5902-2010				INDIVIDUAL-DIFFERENCES IN THE HEAD AND NECK PLUMAGE OF RUDDY TURNSTONES (ARENARIA-INTERPRES) DURING THE BREEDING SEASON											49		60	66	2002	BIRD STUDY
15	Arenaria interpres	7	Summers, RW; Underhill, LG; Simpson, A								Habitat preferences of waders (Charadrii) on the coast of the Orkney Islands					1					Capsule Twelve species of wader were surveyed on 494 coastal sections, revealing features in addition to substratum type that are important in habitat selection.Aims To determine which habitat characteristics affect the probability of waders occurring on coastal sections of Orkney in winter, and to measure the strength of these habitat preferences.Methods A total of 494 sections of shoreline in t…	95	4	753	755	1978	AUK
16	Arenaria interpres	6	Rehfisch, MM; Holloway, SJ; Austin, GE								Population estimates of waders on the non-estuarine coasts of the UK and the Isle of Man during the winter of 1997-98					1					Capsule An updated estimate is presented and major declines in the internationally important populations of several species identified.Aim To provide population estimates of the waders overwintering on the UK and Isle of Man's non-estuarine coasts.Methods UK-NEWS was a repeat of the 1984-85 Winter Shorebird Count (WSC). The WSC results were reanalysed to allow direct comparison with the UK-NEWS r…	50		22	32	2003	BIRD STUDY
17	Arenaria interpres	5	Browne, Stephen; Austin, Graham; Rehfisch, Mark								Evidence of decline in the United Kingdom's non-estuarine coastal waders.											20	3	209	212	2001	Ringing & Migration
18	Arenaria interpres	5	Pearce-Higgins, James W.								A model describing the exchange of individuals between turnstone Arenaria interpres roosts on the north Wales coast.										A recent study of the dispersal of wader species using ringing data from the Wash, modelled the movements of three estuarine species. Using similar methods, the movements of Turnstone Arenaria interpres along the North Wales coast are modelled to provide a rocky shore comparison. Survival rates are also estimated, and shown to be similar to other studies, at 86%. The degree of exchange between Tu…	48		139	146	2001	BIRD STUDY
19	Arenaria interpres	3	Dott, H.E.M.								Declines in turnstones and purple sandpipers wintering in south east Scotland.										Winter counts of shorebirds carried out in south east Scotland on predominantly rocky coasts in East Lothian and Berwickshire have revealed an alarming decline in numbers of Turnstones and Purple Sandpipers since the late 1980s.	107		36	39	2005	Wader Study Group Bulletin
20	Arenaria interpres	3	Scott, G.W.; Niggebrugge, A.R.; Sweeney, B.								Avian habituation to recreational disturbance on the North Yorkshire coast.											121	1016	11	15	1996	Naturalist (Sheffield)
21	Arenaria interpres	2	Burton, Niall H.K.; Fuller, Richard A.; Eaton, Mark A.								Between-year changes in the wintering sites of ruddy turnstones Arenaria interpres: a response to diminished food resources?										Individual Ruddy Turnstones Arenaria interpres have previously been found to be highly faithful to their wintering sites both within and between years. Here we describe between-year shifts (of 64-77 km) in the wintering sites of five birds colour-ringed in NE England. A local population decline following the cessation of sewage discharges suggests that four of these atypical movements might have …	19	2	101	104	1997	Scottish Birds
22	Arenaria interpres	0	Burton, N.H.K.; Goddard, A.P.								Impacts of changes in sewage disposal on populations of waterbirds wintering on the Northumbrian coast report for 2004/05.											417		1	40	2009	BTO Research Report
23	Arenaria interpres	0	Fuller, Richard A.; Bearhop, Stuart; Metcalfe, Neil B.; Piersma, Theunis				Piersma, Theunis/D-1871-2012; Metcalfe, Neil/C-5997-2009; Fuller, Richard/B-7971-2008	Metcalfe, Neil/0000-0002-1970-9349; Fuller, Richard/0000-0001-9468-9678			The effect of group size on vigilance in Ruddy Turnstones Arenaria interpres varies with foraging habitat										Foraging birds can manage time spent vigilant for predators by forming groups of various sizes. However, group size alone will not always reliably determine the optimal level of vigilance. For example, variation in predation risk or food quality between patches may also be influential. In a field setting, we assessed how simultaneous variation in predation risk and intake rate affects the relatio…	155	2	246	257	2013	IBIS
24	Arenaria interpres	0	Glaves, David J.								Observations at the Starcross turnstone roost, 1999/2000 - short report.											72		178	181	2001	Devon Bird Report
25	Arenaria interpres	0	Mason, Christopher F.								Winter use of urban amenity grasslands by turnstones and other waders.											101	2	95	96	2008	British Birds
26	Arenaria interpres	0	Potts, P.M.								Southampton Water turnstones and the Icelandic connection.											2007		226	233	2008	Hampshire Bird Report
27	Arenaria interpres	0	Rogers, M.J.								Feeding association between turnstone and black-headed gull.											90	12	576	576	1997	British Birds
28	Arenaria interpres	0	Smith, Peter								The occurrence of knot Calidris canutus, wood sandpiper Tringa glareola and turnstone Arenaria interpres in Bedfordshire during the period 1946-1995.											50	2	65	68	1996	Bedfordshire Naturalist
29	Arenaria interpres	0	Summers, R.W.; Etheridge, B.								Rates of wear of incoloy and stainless steel rings on turnstones Arenaria interpres.										One hundred Turnstones were ringed with both incolony and stainless steel rings on the Moray coast, Scotland, to measure the rates of wear of these rings. When new, the steel rings were larger and 2.6 times heavier than the incoloy rings. The rate of loss of mass (mg month-1) and loss of mass per surface area (mg cm-2 month-1) were greater for stainless steel rings compared with incoloy rings, bu…	19	2	81	85	1998	Ringing & Migration
30	Arenaria interpres	0	Webb, Kevin								The effects of human activity on turnstones and other wading birds within the Thanet and Sandwich Bay Special Protection Area (SPA).											570		65	76	2004	English Nature Research Reports
1	Asio flammeus	60	SPEAKMAN, JR				John, Speakman/A-9494-2008				THE IMPACT OF PREDATION BY BIRDS ON BAT POPULATIONS IN THE BRITISH-ISLES										The role played by predation of birds in the mortality of British bats is assessed. A review of dietary studies and anecdotal accounts revealed eleven species of bird which occasionally feed on bats-Herring Gull Larus argentatus, Black-headed Gull Larus ridibundus, Rook Corvus frugilegus, Carrion Crow Corvus corone, Little Owl Athene noctua, Short-eared Owl Asio flammeus, Kestrel Falco tinnunculu…	21	3	123	142	1991	MAMMAL REVIEW
2	Asio flammeus	42	STILLMAN, RA; BROWN, AF				Stillman, Richard/B-6018-2009				POPULATION SIZES AND HABITAT ASSOCIATIONS OF UPLAND BREEDING BIRDS IN THE SOUTH PENNINES, ENGLAND										The unenclosed uplands of the south Pennines, approximately 725 km2, were surveyed for upland breeding birds between 12 April and 28 June 1990. The breeding populations of curlew Numenius arquata, golden plover Pluvialis apricaria and merlin Falco columbarius comprised a higher proportion of their national totals than would be expected simply due to the size of the study area, indicating that the…	69	3	307	314	1994	BIOLOGICAL CONSERVATION
3	Asio flammeus	27	Petty, SJ; Anderson, DIK; Davison, M; Little, B; Sherratt, TN; Thomas, CJ; Lambin, X				Lambin, Xavier/E-8284-2011	Lambin, Xavier/0000-0003-4643-2653			The decline of Common Kestrels Falco tinnunculus in a forested area of northern England: the role of predation by Northern Goshawks Accipiter gentilis										We have previously documented the decline of the Common Kestrel Falco tinnunculus over a 23-year period in a large coniferous forest in northern England. Kestrels fed predominantly on Field Voles Microtus agrestis, which were most abundant in young plantations (1-11 years old). Over the 23 years, voles remained abundant in the study area, but their numbers fluctuated cyclically. Here we consider …	145	3	472	483	2003	IBIS
4	Asio flammeus	27	VILLAGE, A								NUMBERS, TERRITORY-SIZE AND TURNOVER OF SHORT-EARED OWLS ASIO FLAMMEUS IN RELATION TO VOLE ABUNDANCE											18	3	198	204	1987	ORNIS SCANDINAVICA
5	Asio flammeus	21	Petty, SJ; Lambin, X; Sherratt, TN; Thomas, CJ; Mackinnon, JL; Coles, CF; Davison, M; Little, B				Lambin, Xavier/E-8284-2011	Lambin, Xavier/0000-0003-4643-2653			Spatial synchrony in field vole Microtus agrestis abundance in a coniferous forest in northern England: The role of vole-eating raptors										1. The regional synchrony hypothesis (RSH) states that synchrony in microtine abundance over large geographical areas is caused by nomadic avian predators that specialize on small mammals for food. This has proved a difficult hypothesis to test because experiments at an appropriate scale are almost impossible.2. We used the decline of the most abundant, nomadic vole-eating raptors in an extensive…	37		136	147	2000	JOURNAL OF APPLIED ECOLOGY
6	Asio flammeus	7	SHAW, G								HABITAT SELECTION BY SHORT-EARED OWLS ASIO-FLAMMEUS IN YOUNG CONIFEROUS FORESTS					2					During the last 70 years Short-eared Owls have exploited the high vole numbers associated with the early stages of large afforestation programmes in northern Britain. As a result, both breeding distribution and population size have expanded. Note that many forests are maturing, this improved status may be under threat unless the owls can use new patches of young forest, created by a replanting pr…	42		158	164	1995	BIRD STUDY
7	Asio flammeus	6	Reynolds, P; Gorman, ML								The timing of hunting in short-eared owls (Asio flammeus) in relation to the activity patterns of Orkney voles (Microtus arvalis orcadensis)					3					Using radio-telemetry, short-term cycles of activity, with a period of about 3 h, were detected in Orkney voles Microtus arvalis orcadensis and in one short-eared owl Asio flammeus, their principal predator. Visual observations showed that owls from four adjacent nests had similar activity patterns. These cycles tended to be synchronous both within and between the two species. Short-eared owls th…	247		371	379	1999	JOURNAL OF ZOOLOGY
8	Asio flammeus	5	Calladine, John; Garner, Graeme; Wernham, Chris; Buxton, Nigel								Variation in the diurnal activity of breeding Short-eared Owls Asio flammeus: implications for their survey and monitoring										Capsule The proportion of time during which breeding Short-eared Owls could be seen during daylight hours was low and assessment of seasonal variation in their detection likelihoods suggests that surveys may only be able reliably to identify pairs that successfully reach the chick-rearing stage.Aims To identify the most appropriate times of day and stages of breeding for surveying and to contribu…	57	1	89	99	2010	BIRD STUDY
9	Asio flammeus	0	Calladine, John; du Feu, Chris; du Feu, Richard								Changing migration patterns of the Short-eared Owl Asio flammeus in Europe: an analysis of ringing recoveries										Analysis of ring recovery data for Short-eared Owls Asio flammeus spanning 96 years, 1912-2007, identified spatial and temporal differences in migration patterns. Birds with breeding areas or natal origins in the Boreal (principally Fenno-Scandinavia) and Continental (principally central Europe) regions tended to move the greatest distances. Although birds from the North Sea littoral and Britain …	153	3	691	698	2012	JOURNAL OF ORNITHOLOGY
10	Asio flammeus	0	Calladine, John; Garner, Graeme; Wernham, Chris								Developing methods for the field survey and monitoring of breeding short-eared owls (Asio flammeus) in the UK: an interim report from pilot fieldwork in 2006.											472		1	62	2007	BTO Research Report
11	Asio flammeus	0	Flood, Robert L.								Short-eared owl sitting on sea surface to avoid carrion crows.											101	12	688	688	2008	British Birds
12	Asio flammeus	0	Garner, Martin								Short-eared owl resting on the sea.											100	12	755	755	2007	British Birds
13	Asio flammeus	0	Gricks, Nathan								Short-eared owl preying on merlin.											98	1	46	46	2005	British Birds
14	Asio flammeus	0	Humble, E. Ann; Aspinall, Richard J.						Simpson, Ian A.; Dennis, Peter		Modelling short-eared owl (Asio flammeus) territories on Orkney mainland.													163	166	1996	The spatial dynamics of biodiversity: towards an understanding of spatial patterns & processes in the landscape: proceedings of the fifth annual conference of IALE (UK), the UK region of the International Association for Landscape Ecology, held at the University of Stirling, 9th-12th September 1996.
15	Asio flammeus	0	Humble, E.A.; Aspinall, R.J.; Gorman, M.; Lambin, X.				Lambin, Xavier/E-8284-2011	Lambin, Xavier/0000-0003-4643-2653	Cooper, Alan; Power, James		Predicting short-eared owl (Asio flammeus) territories on Orkney Mainland.													167	174	1997	Species dispersal and land use processes: proceedings of the sixth annual conference of IALE (UK), the UK region of the International Association for Landscape Ecology, held at the University of Ulster on 9th-11th September 1997.
16	Asio flammeus	0	Lunn, J.								The diet of short-eared owls on a lowland Lancashire moss.											1		46	48	1992	Lancashire Wildlife Journal
17	Asio flammeus	0	Lyndon, A.R.; Wilkinson, T.W.								Drowning of short-eared owl by gulls.											23	1	54	54	2002	Scottish Birds
18	Asio flammeus	0	Roberts, John Lawton; Bowman, Neil								A comparison of the diets of short-eared owls Asio flammeus and long-eared owls A. otus on a heather moor in NE Wales.											2	5	264	273	2000	Welsh Birds
1	Asio otus	60	SPEAKMAN, JR				John, Speakman/A-9494-2008				THE IMPACT OF PREDATION BY BIRDS ON BAT POPULATIONS IN THE BRITISH-ISLES										The role played by predation of birds in the mortality of British bats is assessed. A review of dietary studies and anecdotal accounts revealed eleven species of bird which occasionally feed on bats-Herring Gull Larus argentatus, Black-headed Gull Larus ridibundus, Rook Corvus frugilegus, Carrion Crow Corvus corone, Little Owl Athene noctua, Short-eared Owl Asio flammeus, Kestrel Falco tinnunculu…	21	3	123	142	1991	MAMMAL REVIEW
2	Asio otus	27	Petty, SJ; Anderson, DIK; Davison, M; Little, B; Sherratt, TN; Thomas, CJ; Lambin, X				Lambin, Xavier/E-8284-2011	Lambin, Xavier/0000-0003-4643-2653			The decline of Common Kestrels Falco tinnunculus in a forested area of northern England: the role of predation by Northern Goshawks Accipiter gentilis										We have previously documented the decline of the Common Kestrel Falco tinnunculus over a 23-year period in a large coniferous forest in northern England. Kestrels fed predominantly on Field Voles Microtus agrestis, which were most abundant in young plantations (1-11 years old). Over the 23 years, voles remained abundant in the study area, but their numbers fluctuated cyclically. Here we consider …	145	3	472	483	2003	IBIS
3	Asio otus	4	Barton, NW; Houston, DC								Factors influencing the size of some internal organs in raptors										The size of the small intestine, stomach, kidney, liver and heart were compared among raptor species and considered in relation to hunting strategy and body size. Species relying on rapid acceleration and maneuverability to capture prey in flight, such as sparrowhawk (Accipiter nisus), goshawk (A. gentilis), and peregrine (Fake peregrinus), had the smallest digestive tracts for their size. Specie…	30	4	219	223	1996	JOURNAL OF RAPTOR RESEARCH
4	Asio otus	1	Wyllie, I.; Dale, L.; Newton, I.								Unequal sex-ratio, mortality causes and pollutant residues in long-eared owls in Britain.										Recent reports have indicated an uneven sex-ratio among wintering Long-eared Owls Asio otus, in favour of males in Norway and females in Britain. Harvey & Riddiford (1990) found a ratio of 28 female female : 8 male male among trapped autumn migrants on Fair Isle, Shetland, while Overskaug & Kristiensen (1994) found a ratio of 13 female female : 23 male male among winter accident victims in Norway…	89	10	429	436	1996	British Birds
5	Asio otus	0	Garner, DJ; Milne, BS								A study of the Long-eared Owl Asio otus using wicker nesting baskets					1					In an attempt to increase the number of breeding pairs of Long-eared Owls at Woodwalton Fen National Nature Reserve, wicker baskets of varying design were placed throughout the reserve. Between 1981 and 1996, owls used the baskets on 77 occasions. Of 71 nests followed from incubation, 59.2% hatched young and 50.7% fledged one or more chicks. In only two nests wee the complete clutches hatched and…	45		62	67	1998	BIRD STUDY
6	Asio otus	0	Jardine, D.C.; McNab, E.M.; Davison, M.; Holliday, S.T.								Long-eared owls on Colonsay, Argyll.											29	1	16	21	2009	Scottish Birds
7	Asio otus	0	Kitchin, Charlie; Stone, Brian								Hobby kleptoparasitising long-eared owl on the Nene Washes.											96	12	654	655	2003	British Birds
8	Asio otus	0	Lees, Mik								Habitat and breeding population status of long-eared owls in Cheshire.											1994		94	96	1995	Cheshire and Wirral Bird Report
9	Asio otus	0	Roberts, John Lawton; Bowman, Neil								A comparison of the diets of short-eared owls Asio flammeus and long-eared owls A. otus on a heather moor in NE Wales.											2	5	264	273	2000	Welsh Birds
10	Asio otus	0	Robson, Iain D.								Kleptoparasitism between owl species.											97	2	100	100	2004	British Birds
1	Athene noctua	60	SPEAKMAN, JR				John, Speakman/A-9494-2008				THE IMPACT OF PREDATION BY BIRDS ON BAT POPULATIONS IN THE BRITISH-ISLES										The role played by predation of birds in the mortality of British bats is assessed. A review of dietary studies and anecdotal accounts revealed eleven species of bird which occasionally feed on bats-Herring Gull Larus argentatus, Black-headed Gull Larus ridibundus, Rook Corvus frugilegus, Carrion Crow Corvus corone, Little Owl Athene noctua, Short-eared Owl Asio flammeus, Kestrel Falco tinnunculu…	105	1	39	39	2012	British Birds
2	Athene noctua	11	Hounsome, T; O'Mahony, D; Delahay, R								The diet of Little Owls Athene noctua in Gloucestershire, England					3					Capsule: Little Owls take a wide variety of food, most of which is made up of earthworms, but also includes bats.	62	12	1909	1918	2008	BEHAVIORAL ECOLOGY AND SOCIOBIOLOGY
3	Athene noctua	1	Leigh, Roy S.								The breeding dynamics of little owls (Athene noctua) in north west England.											96	3	138	138	2003	British Birds
4	Athene noctua	1	Leigh, Roy S.								Working structure of the European conservation plan for the little owl Athene noctua: the way forward.											51		282	284	2004	BIRD STUDY
5	Athene noctua	0	Bennell, Ian								Tawny Owl hanging upside down in response to aggressive Carrion Crows.											57	2	76	77	2003	Bedfordshire Naturalist
6	Athene noctua	0	Brown, Mike								Little owls.											21	3	123	142	1991	MAMMAL REVIEW
7	Athene noctua	0	Coath, Martin								Little owl taking common starling.											67	41335	142	148	2001	Oriolus
8	Athene noctua	0	Wood, Nigel								The little owl survey 2002.											22		18	19	2001	Oman Bird News
1	Aythya ferina	41	CARBONE, C; HOUSTON, AI								PATTERNS IN THE DIVING BEHAVIOR OF THE POCHARD, AYTHYA-FERINA - A TEST OF AN OPTIMALITY MODEL										Foraging divers face a trade-off between obtaining oxygen at the surface and food underwater. Houston and Carbone (1992, Behav. Ecol, 3, 255-265) developed models to predict the allocation of time over the dive cycle for aerobic divers that maximize gross and net rates of energy intake under a range of conditions. To test some of these predictions diving experiments on the pochard were conducted.…	48	2	457	465	1994	ANIMAL BEHAVIOUR
2	Aythya ferina	15	PHILLIPS, VE								POCHARD AYTHYA-FERINA USE OF CHIRONOMID-RICH FEEDING HABITAT IN WINTER					2					The feeding distribution of Pochard on two flooded gravel pits was studied at the ARC Wildfowl Centre in January/February 1989, when peak wintering numbers were present. On the deeper lake (mean depth 2.3 m) 99% of feeding occurred in the shallowest 10% of the lake, where depth averaged 1.6 m. In the other shallower lake (mean depth 1.5 m) favoured feeding areas averaged 0.9 m deep. At this lake …	38		118	122	1991	BIRD STUDY
3	Aythya ferina	13	Marsden, SJ								Impact of disturbance on waterfowl wintering in a UK dockland redevelopment area										One of the UK's largest flocks of pochard Aythya ferina and tufted duck A. fuligula winters in Manchester's busy dockland redevelopment area, I examined the effects of human disturbance on the population, and used this information to recommend minimal land-use restrictions that will help ensure the population's continued use of the site. Birds fed at the docks every night. but on 75% of days. the…	26	2	207	213	2000	ENVIRONMENTAL MANAGEMENT
4	Aythya ferina	9	CHOUDHURY, S; BLACK, JM								TESTING THE BEHAVIORAL DOMINANCE AND DISPERSAL HYPOTHESIS IN POCHARD										Wintering flocks of diving ducks often show a great disparity in sex ratio with males predominating. The behavioural dominance and dispersal hypothesis explains this phenomenon by arguing that males dominate and exclude females from limited food sources, forcing them to migrate further south. Our study of a wild flock of Pochard Aythya ferina under manipulated feeding conditions, provides some su…	22	2	155	159	1991	ORNIS SCANDINAVICA
5	Aythya ferina	8	FOX, AD; SALMON, DG				Fox, Anthony/I-7465-2013				CHANGES IN NON-BREEDING DISTRIBUTION AND HABITAT OF POCHARD AYTHYA-FERINA IN BRITAIN											46	4	303	316	1988	BIOLOGICAL CONSERVATION
6	Aythya ferina	7	Fox, Anthony D.; King, Roy				Fox, Anthony/I-7465-2013				Body mass loss amongst moulting Pochard Aythya ferina and Tufted Duck A. fuligula at Abberton Reservoir, South East England										We assessed the contribution of endogenous fat stores to meeting energetic needs during the flightless moult period in Pochard and Tufted Duck by regressing mass on the progression of wing moult, as measured by primary length. Pochard lost between 22.1% (males) and 24.2% (females) of body mass and female Tufted Duck 12.2% during wing moult at Abberton Reservoir, Essex. Based on a 27-day flightles…	152	3	727	732	2011	JOURNAL OF ORNITHOLOGY
7	Aythya ferina	3	Marsden, SJ; Sullivan, MS								Intersexual differences in feeding ecology in a male-dominated wintering Pochard Aythya ferina population										Intersexual differences in feeding rates, aggression rates, and feeding site selection were investigated in a flock of up to 2700 Pochard Aythya ferina wintering at Salford docks, Greater Manchester (239 males per 100 females). As often found elsewhere, females were less aggressive than males, males attacked other males less, and females more, than expected. However, recorded levels of aggression…	27	2	126	138	2005	Sandgrouse
8	Aythya ferina	2	King, Roy; Fox, Anthony D.				Fox, Anthony/I-7465-2013				Moulting mass dynamics of female Gadwall Anas strepera and male Wigeon A. penelope at Abberton Reservoir, southeast England										Capsule Female Gadwall Anas strepera and male Wigeon A. penelope lost about 18% of body mass during flightless wing moult at Abberton Reservoir, southeast England - slightly greater than that recorded for other dabbling ducks but less than among Pochard Aythya ferina at the same site. Results, while consistent with the 'moult stress' hypothesis, also support the hypothesis that dabbling ducks dep…	88	1	1	7	2000	ARDEA
9	Aythya ferina	2	Kirby, J.S.; Bell, M.C.								Surveillance of non-breeding waterfowl populations methods to trigger conservation action.											13	2	493	512	1996	Gibier Faune Sauvage
10	Aythya ferina	2	Musgrove, Andrew J.; Austin, Graham E.; Hearn, Richard D.; Holt, Chas A.; Stroud, David A.; Wotton, Simon R.								Overwinter population estimates of British waterbirds.										In total, over 12.5 million waterbirds occur in Britain during the winter. Estimates of the numbers of non-breeding waterbirds visiting Britain are important for the birds' conservation, both for status assessments and for the identification and designation of nationally and internationally important sites. This paper collates data from a wide range of sources, principally for the period 2004/05 …	20	4	358	363	2001	Ringing & Migration
11	Aythya ferina	1	Marsden, SJ; Bellamy, GS								Microhabitat characteristics of feeding sites used by diving duck Aythya wintering on the grossly polluted Manchester Ship Canal, UK										Nationally important wintering populations of up to 2700 Pochard Aythya ferina and 2000 Tufted Duck A. fuligula feed around Salford Docks in the upper reaches of the Manchester Ship Canal. The system is grossly organically polluted and devoid of aquatic macrophytes, but holds high densities of oligochaetes and other pollution-tolerant invertebrates. The species fed together and differences in fee…	27	3	278	283	2000	ENVIRONMENTAL CONSERVATION
12	Aythya ferina	1	Stewart, Barry; Lauder, Alan								Gizzard contents of pochard, tufted duck and goldeneye from Loch Leven, Kinross, in winter 1994-95.										We examined the gizzard contents of 3 species of diving duck which fed on the benthos of Loch Leven during winter 1994-95. Tufted Ducks and Goldeneye appeared to be mainly carnivorous and Pochard mainly herbivorous. Chironomid larvae appear to be the most important food item overall. The results are discussed in relation to previous studies.	19	1	28	35	1997	Scottish Birds
13	Aythya ferina	0	Bloomfield, Andrew								Hatching season for Common Pochards.											105	8	479	479	2012	British Birds
14	Aythya ferina	0	Marsden, Stuart J.								The importance of Salford Docks for wintering waterbirds.											21		124	125	1997	Birds in Greater Manchester
15	Aythya ferina	0	Simmonds, Mark								Parasitic feeding by red-crested pochard.											89	4	175	175	1996	British Birds
1	Aythya fuligula	45	BEVAN, RM; SPEAKMAN, JR; BUTLER, PJ				John, Speakman/A-9494-2008				DAILY ENERGY-EXPENDITURE OF TUFTED DUCKS - A COMPARISON BETWEEN INDIRECT CALORIMETRY, DOUBLY LABELED WATER AND HEART-RATE										1. The doubly labelled water (DLW) technique has been used to estimate the rate of energy expenditure of many species of free-living birds including some that dive. The technique, however, has never been validated in an actively diving bird.2. DLW was used to estimate the metabolic rate of the diving tufted duck and the derived estimate was compared with the value obtained by direct respirometry.…	9	1	40	47	1995	FUNCTIONAL ECOLOGY
2	Aythya fuligula	36	Halsey, L; Woakes, A; Butler, P				Halsey, Lewis/B-8498-2011				Testing optimal foraging models for air-breathing divers					4					Models of diving optimality qualitatively predict diving behaviours of aquatic birds and mammals. However, none of them has been empirically tested. We examined the quantitative predictions of optimal diving models by combining cumulative oxygen uptake curves with estimates of power costs during the dives of six tufted ducks, Aythya fuligula. The effects of differing foraging costs on dive durati…	65		641	653	2003	ANIMAL BEHAVIOUR
3	Aythya fuligula	28	Parkes, R; Halsey, LG; Woakes, AJ; Holder, RL; Butler, PJ				Halsey, Lewis/B-8498-2011				Oxygen uptake during post dive recovery in a diving bird Aythya fuligula: implications for optimal foraging models										The rate of oxygen uptake at the surface between dives was measured for four tufted ducks, Aythya fuligula, during bouts of foraging dives to a depth of 1.8 m. The ducks surfaced into a respirometer box after each dive so that the rate of oxygen uptake ((V) over dot O-2) could be measured. (V) over dot O-2 decreased over time at the surface and there was a particularly rapid phase of oxygen uptak…	205	24	3945	3954	2002	JOURNAL OF EXPERIMENTAL BIOLOGY
4	Aythya fuligula	23	Butler, PJ								Energetic costs of surface swimming and diving of birds										The energetic costs of swimming at the surface (swimming) and swimming underwater (diving) are compared in tufted ducks (Aythya fuligula) and three species of penguins, the gentoo (Pygoscelis papua), the king (Aptenodytes patagonicus), and the emperor (Aythya forsteri). Ducks swim on the surface and use their webbed feet as paddles, whereas penguins tend to swim just below the surface and use the…	71	6	720	730	1998	PHYSIOLOGICAL ZOOLOGY
5	Aythya fuligula	22	HILL, DA; ELLIS, N								SURVIVAL AND AGE-RELATED-CHANGES IN THE FORAGING BEHAVIOR AND TIME BUDGET OF TUFTED DUCKLINGS AYTHYA-FULIGULA											126	4	544	550	1984	IBIS
6	Aythya fuligula	19	HILL, DA								LAYING DATE, CLUTCH SIZE AND EGG SIZE OF THE MALLARD ANAS-PLATYRHYNCHOS AND TUFTED DUCK AYTHYA-FULIGULA											126	4	484	495	1984	IBIS
7	Aythya fuligula	18	Green, J; Woakes, A; Boyd, I; Butler, P				Green, Jonathan/B-8799-2011	Green, Jonathan/0000-0001-8692-0163			Cardiovascular adjustments during locomotion in penguins										The high costs of airborne flapping flight are reflected in a difference between the oxygen pulse (OP; amount of oxygen consumed per heart beat) during flight and that during terrestrial locomotion, as well as a difference in the relationship between heart rate (f(H)) and rate of oxygen consumption ((V) over dot O-2). We tested and failed to accept the hypothesis that there would be similar diffe…	83	3	445	454	2005	CANADIAN JOURNAL OF ZOOLOGY-REVUE CANADIENNE DE ZOOLOGIE
8	Aythya fuligula	18	Halsey, Lewis G.; Fahlman, Andreas; Handrich, Yves; Schmidt, Alexander; Woakes, Anthony J.; Butler, Patrick J.				Fahlman, Andreas/A-2901-2011; Halsey, Lewis/B-8498-2011				How accurately can we estimate energetic costs in a marine top predator, the king penguin?										King penguins (Aptenodytes patagonicus) are one of the greatest consumers of marine resources. However, while their influence on the marine ecosystem is likely to be significant, only an accurate knowledge of their energy demands will indicate their true food requirements. Energy consumption has been estimated for many marine species using the heart rate-rate of oxygen consumption (f(H) - V over …	110	2	81	92	2007	ZOOLOGY
9	Aythya fuligula	13	Marsden, SJ								Impact of disturbance on waterfowl wintering in a UK dockland redevelopment area										One of the UK's largest flocks of pochard Aythya ferina and tufted duck A. fuligula winters in Manchester's busy dockland redevelopment area, I examined the effects of human disturbance on the population, and used this information to recommend minimal land-use restrictions that will help ensure the population's continued use of the site. Birds fed at the docks every night. but on 75% of days. the…	76	4	436	446	2003	PHYSIOLOGICAL AND BIOCHEMICAL ZOOLOGY
10	Aythya fuligula	12	Halsey, LG; Butler, PJ; Woakes, AJ				Halsey, Lewis/B-8498-2011				Breathing hypoxic gas affects the physiology as well as the diving behaviour of tufted ducks										We measured the effects of exposure to hypoxia (15% and 11% oxygen) and hypercapnia (up to 4.5% carbon dioxide) on rates of respiratory gas exchange both between and during dives in tufted ducks, Aythya fuligula, to investigate to what extent these may explain changes in diving behaviour. As found in previous studies, the ducks decreased dive duration (t(d)) and increased surface duration when di…	78	2	273	284	2005	PHYSIOLOGICAL AND BIOCHEMICAL ZOOLOGY
11	Aythya fuligula	4	Halsey, LG; Wallace, SE; Woakes, AJ; Winkler, H; Butler, PJ				Halsey, Lewis/B-8498-2011				Tufted ducks Aythya fuligula do not control buoyancy during diving										Work against buoyancy during submergence is a large component of the energy costs for shallow diving ducks. For penguins, buoyancy is less of a problem, however they still seem to trade-off levels of oxygen stores against the costs and benefits of buoyant force during descent and ascent. This trade-off is presumably achieved by increasing air sac volume and hence pre-dive buoyancy (B-pre) when di…	36	3	261	267	2005	JOURNAL OF AVIAN BIOLOGY
12	Aythya fuligula	1	Marsden, SJ; Bellamy, GS								Microhabitat characteristics of feeding sites used by diving duck Aythya wintering on the grossly polluted Manchester Ship Canal, UK										Nationally important wintering populations of up to 2700 Pochard Aythya ferina and 2000 Tufted Duck A. fuligula feed around Salford Docks in the upper reaches of the Manchester Ship Canal. The system is grossly organically polluted and devoid of aquatic macrophytes, but holds high densities of oligochaetes and other pollution-tolerant invertebrates. The species fed together and differences in fee…	27	3	278	283	2000	ENVIRONMENTAL CONSERVATION
13	Aythya fuligula	1	Stewart, Barry; Lauder, Alan								Gizzard contents of pochard, tufted duck and goldeneye from Loch Leven, Kinross, in winter 1994-95.										We examined the gizzard contents of 3 species of diving duck which fed on the benthos of Loch Leven during winter 1994-95. Tufted Ducks and Goldeneye appeared to be mainly carnivorous and Pochard mainly herbivorous. Chironomid larvae appear to be the most important food item overall. The results are discussed in relation to previous studies.	19	1	28	35	1997	Scottish Birds
14	Aythya fuligula	0	Bloomfield, Andrew								The killing of a young shelduck by a tufted duck.											99	3	153	153	2006	British Birds
15	Aythya fuligula	0	Gillham, Eric								White pelicans taking feral pigeons and ducks in St. James's Park.											97	1	47	47	2004	British Birds
16	Aythya fuligula	0	Kalejta-Summers, Bozena								Long-term changes in numbers and distribution of wintering ducks and swans in the Moray Firth, Scotland, 1985-2002.										Counts of ducks and swans in the Moray Firth between 1985 and 2002 were analysed to assess changes in their numbers and distributions. The average count for all ducks combined exceeded 20,000 in all winters. Wigeon Anas penelope was the most abundant,platyrhynchos and Teal A. crecca. The majority of species species, followed by Mallard A. peaked in December and January, except Wigeon, which peake…	56		94	112	2006	Wildfowl
17	Aythya fuligula	0	Kirby, J.S.; Smith, Philip H.								Comparison of winter foraging activity of pochard and tufted duck at Seaforth, Merseyside.											41335		7	16	1994	Lancashire Wildlife Journal
18	Aythya fuligula	0	Mitcham, Terry								Black-necked grebe associating with tufted ducks.											90	6	227	228	1997	British Birds
19	Aythya fuligula	0	Sutherland, Ian T.								Foraging behaviour of wild tufted duck Aythya fuligula in winter.										The Tufted Duck Aythya fuligula is invariably an underwater feeder which exploits the benthos. Field observations made in the early 20th century found that Tufted Duck foraging in the wild had a dive to surface time ratio of approximately 2 : 1. More recent studies of captive Tufted Duck found that the dive to surface time ratio was about 1 : 1. This study re-examined the feeding behaviour of wil…	59		53	61	2009	Wildfowl
1	Botaurus stellaris	46	GILBERT, G; MCGREGOR, PK; TYLER, G								VOCAL INDIVIDUALITY AS A CENSUS TOOL - PRACTICAL CONSIDERATIONS ILLUSTRATED BY A STUDY OF 2 RARE SPECIES										Vocalizations have the potential to allow the identification of individual birds. The practicalities of the technique were assessed for European Bitterns (Botaurus stellaris) and Black-throated Divers (Gavia arctica), two species that present different monitoring problems. The diurnal and seasonal pattern of booming behavior is predictable for bitterns; the less predictable pattern of Black-throa…	65	3	335	348	1994	JOURNAL OF FIELD ORNITHOLOGY
2	Botaurus stellaris	34	Tyler, GA; Smith, KW; Burges, DJ								Reedbed management and breeding bitterns Botaurus stellaris in the UK										A survey of habitats at 17 reedbed sites in the UK which currently hold or have recently held breeding bitterns Botaurus stellaris has shown significant differences between sites with decreasing and sites with increasing numbers of birds over the period 1979 to 1994. Those sites where bitterns have declined had significantly higher values for variables describing scrub encroachment and the presen…	86	2	257	266	1998	BIOLOGICAL CONSERVATION
3	Botaurus stellaris	28	Gilbert, G; Tyler, GA; Smith, KW				Piper, Walter/B-7908-2009				Local annual survival of booming male Great Bittern Botaurus stellaris in Britain, in the period 1990-1999										Male Great Bitterns Botaurus stellaris have individually distinctive boom vocalizations which have been used since 1990 to count the British population accurately. We used vocal individuality to identify birds between years and analyse the survival of the British booming population. We used six instances of Great Bitterns known to be the same birds (from radio tracking and re-sighting of darvic r…	144	1	51	61	2002	IBIS
4	Botaurus stellaris	22	Gilbert, G; Tyler, GA; Dunn, CJ; Smith, KW								Nesting habitat selection by bitterns Botaurus stellaris in Britain and the implications for wetland management										The rarity and decline of the bittern Botaurus stellaris in Britain has prompted large-scale wetland restoration and more recently, wetland creation projects. In order to guide such habitat management, we investigated whether any large or fine-scale features within British wetland sites best described the selection of female bittern nesting positions. Birds nested in continuous vegetation (usuall…	124	4	547	553	2005	BIOLOGICAL CONSERVATION
5	Botaurus stellaris	18	Gilbert, G; Tyler, G; Smith, KW								Behaviour, home-range size and habitat use by male Great Bittern Botaurus stellaris in Britain										This paper describes the first use of radiotracking to follow closely the secretive Great Bittern Botaurus stellaris, and to quantify its reedbed habitat preferences at a fine scale. Eight males were tracked at two sites in Britain, at which they were mainly resident through the winter. Their median home-range sizes were 14.6, 19.3 and 33.1 ha during the booming, moult and winter periods, respect…	147	3	533	543	2005	IBIS
6	Botaurus stellaris	17	Gilbert, G; Tyler, G; Smith, KW								Nestling diet and fish preference of Bitterns Botaurus stellaris in Britain.										The first assessment of both nestling diet composition and selection of fish prey by Bitterns Botaurus stellaris in Britain. We provide quantitative information on the diet of nestling Bitterns, examine the factors influencing diet composition and determine whether adult females are choosing particular species and size of prey. Sixty regurgitate samples from 44 broods were examined during visits …	91	1	35	44	2003	ARDEA
7	Botaurus stellaris	10	Gilbert, Gillian; Tyler, Glen A.; Dunn, Christopher J.; Ratcliffe, Norman; Smith, Ken W.								The influence of habitat management on the breeding success of the Great Bittern Botaurus stellaris in Britain										Great Bitterns Botaurus stellaris have experienced a population decline in the UK, such that in 1997 the total number of breeding males was just 11. This study aimed to identify factors affecting productivity, and how management could be used to manipulate this. An intensive study of Great Bittern breeding success was conducted between 1997 and 2001. The date that males established their booming …	149	1	53	66	2007	IBIS
8	Botaurus stellaris	9	Mallord, JW; Tyler, GA; Gilbert, G; Smith, KW								The first case of successful double brooding in the Great Bittern Botaurus stellaris											142	4	672	675	2000	IBIS
9	Botaurus stellaris	6	Noble, RAA; Harvey, JP; Cowx, IG				Cowx, Ian/A-5540-2009				Can management of freshwater fish populations be used to protect and enhance the conservation status of a rare, fish-eating bird, the bittern, Botaurus stellaris, in the UK?										The bittern, Botaurus stellaris (L.), is a Red Data list species in the UK with currently approximately 30 breeding males restricted to a few wet reedbeds, the majority of which are located in the East Anglian region of England. Although having a diverse diet, the bittern is mainly piscivorous, and eels, Anguilla anguilla (L.), and rudd, Scardinius erythrophthalmus (L.), are their main prey speci…	11	41367	291	302	2004	FISHERIES MANAGEMENT AND ECOLOGY
10	Botaurus stellaris	4	Gilbert, Gillian; Brown, Andrew F.; Wotton, Simon R.								Current dynamics and predicted vulnerability to sea-level rise of a threatened Bittern Botaurus stellaris population										The decline of the Bittern Botaurus stellaris has long been symbolic of wetland habitat loss and fragmentation across western Europe. Wetland restoration and creation activity, targeted at Bittern, has been ongoing in the UK for more than 10 years and the overall numbers of occupied sites has increased five-fold in that time. The strong recovery, whilst cause for celebration, disguises the contin…	56	3	143	149	2008	AUSTRALIAN JOURNAL OF ZOOLOGY
11	Botaurus stellaris	4	Noble, R.A.A.; Harvey, J.P.; Cowx, I.G.						Cowx, I.G.		Management of cyprinid fish populations as an important prey group for the endangered piscivorous bird, bittern, Botaurus stellaris.											54		54	60	2007	BIRD STUDY
12	Botaurus stellaris	3	Knights, Brian						Cowx, I.G.		Enhancing stocks of European eel, Anguilla anguilla, to benefit bittern, Botaurus stellaris.											104	11	636	641	2011	British Birds
13	Botaurus stellaris	3	Self, M								A review of management for fish and bitterns, Botaurus stellaris, in wetland reserves										The bittern, Botaurus stellaris L., is a cryptic, fish-eating, reedbed bird that was once widespread and common across the UK. It became extinct in 1886, only to return two decades later. After increasing to a peak of 80 booming males in 1954, the population declined to only 11 in 1997, and a second extinction in the UK seemed likely. In conjunction with partner organisations, the Royal Society f…			151	164	2003	Interactions between fish and birds: implications for management.
14	Botaurus stellaris	2	Dmitrenok, Marina; Puglisi, Luca; Demongin, Laurent; Gilbert, Gillian; Polak, Marcin; Bretagnolle, Vincent				Polak, Marcin/H-1614-2011				Geographical variation, sex and age in Great Bittern Botaurus stellaris using coloration and morphometrics										Biometrics, plumage and bare-part colour of 87 Great Bitterns Botaurus stellaris from the UK, France, Italy, Poland and Belarus, of known sex (sexed by behaviour, DNA or dissection), were analysed to provide reliable sexing and ageing criteria for this little-known species, and to investigate geographical variation in biometrics. Four parameters were analysed: bill length, tarsus, wing length and…	149	1	37	44	2007	IBIS
15	Botaurus stellaris	0	Alsbury, Sarah								Habitat loss and restoration - the story of the bog blutter.											51	3	130	134	2004	Biologist (London)
16	Botaurus stellaris	0	ap Rheinallt, Tristan; Stiubhart, Domhnall Uilleam								Early records of bitterns in the Outer Hebrides.											30	2	124	125	2010	Scottish Birds
17	Botaurus stellaris	0	Brown, Andy; Gilbert, Gillian; Wotton, Simon								Bitterns and Bittern Conservation in the UK.										Once widespread and even locally numerous across the lowlands of the UK, the Eurasian Bittern Botaurus stellaris had been extirpated by a combination of habitat loss and persecution by the late 1880s. After the species returned, at the start of the second decade of the twentieth century, numbers increased to a peak in the 1950s, before falling precipitously to a low point in 1997, when the popula…	150	4	856	858	2008	IBIS
18	Botaurus stellaris	0	Gurney, M.								Introduction of rudd Scardinius erythropthalmus as food for bitterns Botaurus stellaris at Titchwell Marsh RSPB reserve, Norfolk, England.										Rudd Scardinius erythropthalmus introduced to a wetland nature reserve as a potential food source for bitterns Botaurus stellaris, successfully became established within 3 years of release.	4		4	5	2007	Conservation Evidence
19	Botaurus stellaris	0	Harris, Alan								Roosting behaviour of wintering Eurasian bitterns in the Lee Valley.										In the Lee Valley, Eurasian Bitterns Botaurus stellaris leave their foraging sites and go to roost late in the day, usually after sunset. The distance travelled is often only a few metres (accomplished on foot) and for around two-thirds of the birds in the study area the roost site is in the same reedbed in which they forage. Consequently, travelling time and distance are minimal. They roost high…	99	4	174	182	2006	British Birds
20	Botaurus stellaris	0	McCanch, Norman								Common kingfisher mobbing great bittern.											96	1	44	44	2003	British Birds
21	Botaurus stellaris	0	Parry, James; Greenwood, Jeremy J.D.								A double century for Bitterns.										The year 2011 has been a double-century year for the Eurasian Bittern: not only did the number of booming males in England top 100, but it is exactly 100 years since the species was rediscovered breeding after a long absence from the country.	104	12	743	746	2011	British Birds
22	Botaurus stellaris	0	Smith, Peter								Spring migration of Eurasian bitterns.											102	9	510	511	2009	British Birds
23	Botaurus stellaris	0	Welch, Geoff								Digging for bitterns - reshaping Minsmere's scrape.											44		7	9	1996	Suffolk Birds
24	Botaurus stellaris	0	Werndly, M.; Davidson, E.								Bitterns on Rum and in Edinburgh.											32	3	280	280	2012	Scottish Birds
25	Botaurus stellaris	0	White, David								Copulation behaviour of Eurasian bittern.											100	10	624	624	2007	British Birds
26	Botaurus stellaris	0	Wotton, Simon; Grantham, Mark; Moran, Nick; Gilbert, Gillian								Eurasian Bittern distribution and abundance in the UK during the 2009/10 winter.										By collating records from a number of sources, primarily via Bird Guides, Bird Track and county bird recorders, it was found that there were a minimum of 600 wintering Eurasian Bitterns Botaurus steads in the UK during the 2009/10 winter.There were records from nearly 400 sites, the majority in England. It was estimated that the winter population included 208 resident UK Bitterns.	105	2	58	87	2012	British Birds
27	Botaurus stellaris	0	Wotton, Simon; Lodge, Chris								The bittern Botaurus stellaris population on the Suffolk coast and the potential vulnerability to sea level rise.											57		8	12	2008	Suffolk Birds
1	Branta canadensis	34	LESSELLS, CM								NATAL AND BREEDING DISPERSAL OF CANADA GEESE BRANTA-CANADENSIS											127	1	31	41	1985	IBIS
2	Branta canadensis	11	Allan, John R.; Kirby, Jeffrey S.; Feare, Christopher J.								The biology of canada geese Branta canadensis in relation to the management of feral populations										Allan, J.R., Kirby, J.S. & Feare, C.J. 1995: The biology of canada geese Branta canadensis in relation to the management of feral populations. - Wildl. Biol. I: 129-143. Feral populations of the canada goose Branta canadensis continue to grow at around 8% per year in the UK. The growing feral populations in Europe and non-migratory populations of 'urban' canada geese in North America are beginnin…	1	3	129	143	1995	WILDLIFE BIOLOGY
3	Branta canadensis	8	WRIGHT, R; GILES, N								BREEDING SUCCESS OF CANADA AND GREYLAG GEESE BRANTA-CANADENSIS AND ANSER-ANSER ON GRAVEL PITS					1						78	1	167	174	2009	ANIMAL BEHAVIOUR
4	Branta canadensis	7	Rehfisch, MM; Austin, GE; Holloway, SJ; Allan, JR; O'Connell, M								An approach to the assessment of change in the numbers of Canada Geese Branta canaidensis and Greylag Geese Anser anser in southern Britain					1					Capsule Population change in geese was assessed using an approach that requires a relatively small sampling effort.Aims During the 1999 breeding season a survey was carried out to determine if the numbers of introduced Canada and re-established Greylag Geese in southern Britain had changed since 1988-91 and whether any change had occurred in areas with previously high or low Canada Goose densitie…	50		77	99	1999	Wildfowl
5	Branta canadensis	5	Hughes, B.; Kirby, J.; Rowcliffe, J.M.								Waterbird conflicts in Britain and Ireland: ruddy ducks Oxyura jamaicensis, Canada geese Branta canadensis, and cormorants Phalacrocorax carbo.											54		343	352	2007	BIRD STUDY
6	Branta canadensis	4	Austin, Graham E.; Rehfisch, Mark M.; Allan, John R.; Holloway, Steve J.								Population size and differential population growth of introduced Greater Canada Geese Branta canadensis and re-established Greylag Geese Anser anser across habitats in Great Britain in the year 2000					3					Capsule Both populations are increasing at a similar rate.Aims During 2000, an extensive survey of introduced Greater Canada Geese and re-established Greylag Geese in Great Britain was undertaken in order to update population estimates lost made between 1988 and 1991.Methods A randomized stratified sample of 1329 of the 61 510 tetrads (2 km x 2 km unit) in Great Britain was surveyed. The habitat …	49		50	59	2002	BIRD STUDY
7	Branta canadensis	2	Baxter, Andrew T.; Robinson, Andrew P.								Monitoring and influencing feral Canada goose (Branta canadensis) behaviour to reduce birdstrike risks to aircraft										Canada Geese (Branta canadensis) were caught and ringed at 55 moult sites within 13 km of a UK airport between 1999 and 2004. More than 2500 visits were subsequently made to some 300 sites, resulting in over 10000 re-sightings of individual birds. The breeding, moulting and foraging ecology of individuals was used to assist in the development of a management plan to help reduce the birdstrike ris…	53	4	341	346	2007	INTERNATIONAL JOURNAL OF PEST MANAGEMENT
[truncated: 5,805 more rows]
